# Supplementary material for: Thrombolysis, time-to-treatment and in-hospital outcomes among young adults with ischaemic stroke in China: findings from a nationwide registry study in China
Source: PubMed Central journal article supplement — BMJ Open. 2022 Jun 23;12(6):e055055. doi: 10.1136/bmjopen-2021-055055 (PMC9234794; doi:10.1136/bmjopen-2021-055055), 2022-06-23
Supplement: bmjopen-2021-055055.draft_revisions.pdf [file bmjopen-2021-055055.draft_revisions.pdf]

# BMJ Open

BMJ Open is committed to open peer review. As part of this commitment we make the peer review history of every article we publish publicly available.

When an article is published we post the peer reviewers' comments and the authors' responses online. We also post the versions of the paper that were used during peer review. These are the versions that the peer review comments apply to.

The versions of the paper that follow are the versions that were submitted during the peer review process. They are not the versions of record or the final published versions. They should not be cited or distributed as the published version of this manuscript.

BMJ Open is an open access journal and the full, final, typeset and author-corrected version of record of the manuscript is available on our site with no access controls, subscription charges or pay-per-view fees (<http://bmjopen.bmj.com>).

If you have any questions on BMJ Open's open peer review process please email [info.bmjopen@bmj.com](mailto:info.bmjopen@bmj.com)

# BMJ Open

## Thrombolysis, Time-to-Treatment and In-Hospital Outcomes Among Young Adults with Ischemic Stroke in China

|                               |                                                                                                                                                                                                                                                                                                                                                                                                                                                                                                                                                                                                                                                                                                                                                                                                                                                                                                                                                                                                                                                                                                                                                                                                                                                                                                                                                                                                                                                                                                                                                                                                                                                                                                                                                                                                                                                                                                                                                                                                                                                                                                                                                                                                                                                                                                                                                                                                                                                                                                                                                                                                                         |
|-------------------------------|-------------------------------------------------------------------------------------------------------------------------------------------------------------------------------------------------------------------------------------------------------------------------------------------------------------------------------------------------------------------------------------------------------------------------------------------------------------------------------------------------------------------------------------------------------------------------------------------------------------------------------------------------------------------------------------------------------------------------------------------------------------------------------------------------------------------------------------------------------------------------------------------------------------------------------------------------------------------------------------------------------------------------------------------------------------------------------------------------------------------------------------------------------------------------------------------------------------------------------------------------------------------------------------------------------------------------------------------------------------------------------------------------------------------------------------------------------------------------------------------------------------------------------------------------------------------------------------------------------------------------------------------------------------------------------------------------------------------------------------------------------------------------------------------------------------------------------------------------------------------------------------------------------------------------------------------------------------------------------------------------------------------------------------------------------------------------------------------------------------------------------------------------------------------------------------------------------------------------------------------------------------------------------------------------------------------------------------------------------------------------------------------------------------------------------------------------------------------------------------------------------------------------------------------------------------------------------------------------------------------------|
| Journal:                      | <i>BMJ Open</i>                                                                                                                                                                                                                                                                                                                                                                                                                                                                                                                                                                                                                                                                                                                                                                                                                                                                                                                                                                                                                                                                                                                                                                                                                                                                                                                                                                                                                                                                                                                                                                                                                                                                                                                                                                                                                                                                                                                                                                                                                                                                                                                                                                                                                                                                                                                                                                                                                                                                                                                                                                                                         |
| Manuscript ID                 | bmjopen-2021-055055                                                                                                                                                                                                                                                                                                                                                                                                                                                                                                                                                                                                                                                                                                                                                                                                                                                                                                                                                                                                                                                                                                                                                                                                                                                                                                                                                                                                                                                                                                                                                                                                                                                                                                                                                                                                                                                                                                                                                                                                                                                                                                                                                                                                                                                                                                                                                                                                                                                                                                                                                                                                     |
| Article Type:                 | Original research                                                                                                                                                                                                                                                                                                                                                                                                                                                                                                                                                                                                                                                                                                                                                                                                                                                                                                                                                                                                                                                                                                                                                                                                                                                                                                                                                                                                                                                                                                                                                                                                                                                                                                                                                                                                                                                                                                                                                                                                                                                                                                                                                                                                                                                                                                                                                                                                                                                                                                                                                                                                       |
| Date Submitted by the Author: | 01-Jul-2021                                                                                                                                                                                                                                                                                                                                                                                                                                                                                                                                                                                                                                                                                                                                                                                                                                                                                                                                                                                                                                                                                                                                                                                                                                                                                                                                                                                                                                                                                                                                                                                                                                                                                                                                                                                                                                                                                                                                                                                                                                                                                                                                                                                                                                                                                                                                                                                                                                                                                                                                                                                                             |
| Complete List of Authors:     | <p>Wang, HaiYan; Capital Medical University Affiliated Beijing Shijitan Hospital, Department of Neurology</p> <p>Gu, Hongqiu; Beijing Tiantan Hospital, China National Clinical Research Center for Neurological Diseases; Beijing Tiantan Hospital, National Center for Healthcare Quality Management in Neurological Diseases</p> <p>Zhou, Qi; Beijing Tiantan Hospital, China National Clinical Research Center for Neurological Diseases; Beijing Tiantan Hospital, National Center for Healthcare Quality Management in Neurological Diseases</p> <p>Jiang, YingYu; Beijing Tiantan Hospital, China National Clinical Research Center for Neurological Diseases; Beijing Tiantan Hospital, National Center for Healthcare Quality Management in Neurological Diseases</p> <p>Yang, Xin; Beijing Tiantan Hospital, China National Clinical Research Center for Neurological Diseases; Beijing Tiantan Hospital, National Center for Healthcare Quality Management in Neurological Diseases</p> <p>Wang, Chunjuan; Beijing Tiantan Hospital, China National Clinical Research Center for Neurological Diseases; Beijing Tiantan Hospital, National Center for Healthcare Quality Management in Neurological Diseases</p> <p>Zhao, Xingquan; Beijing Tiantan Hospital, Vascular Neurology, Department of Neurology; Research Unit of Artificial Intelligence in Cerebrovascular Disease, Chinese Academy of Medical Sciences</p> <p>Wang, Yilong; Beijing Tiantan Hospital, China National Clinical Research Center for Neurological Diseases; Beijing Tiantan Hospital, Vascular Neurology, Department of Neurology</p> <p>Liu, Liping; Beijing Tiantan Hospital, Neuro-intensive Care Unit, Department of Neurology</p> <p>Meng, Xia; Beijing Tiantan Hospital, China National Clinical Research Center for Neurological Diseases</p> <p>Li, Hao; Beijing Tiantan Hospital, China National Clinical Research Center for Neurological Diseases</p> <p>Liu, Chelsea; Harvard University T H Chan School of Public Health, Department of Epidemiology</p> <p>Li, Zixiao; Beijing Tiantan Hospital, China National Clinical Research Center for Neurological Diseases; Beijing Tiantan Hospital, National Center for Healthcare Quality Management in Neurological Diseases</p> <p>Wang, Yongjun; Beijing Tiantan Hospital, China National Clinical Research Center for Neurological Diseases; Beijing Tiantan Hospital, National Center for Healthcare Quality Management in Neurological Diseases</p> <p>Jiang, Yong; Beijing Tiantan Hospital, China National Clinical Research Center for Neurological Diseases</p> |

1  
2  
3  
4  
5  
6  
7  
8  
9  
10  
11  
12  
13  
14  
15  
16  
17  
18  
19  
20  
21  
22  
23  
24  
25  
26  
27  
28  
29  
30  
31  
32  
33  
34  
35  
36  
37  
38  
39  
40  
41  
42  
43  
44  
45  
46  
47  
48  
49  
50  
51  
52  
53  
54  
55  
56  
57  
58  
59  
60

|           |                                                                    |
|-----------|--------------------------------------------------------------------|
| Keywords: | Adult neurology < NEUROLOGY, Stroke < NEUROLOGY, VASCULAR MEDICINE |
|           |                                                                    |

SCHOLARONE™  
Manuscripts

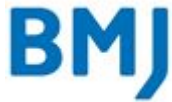

I, the Submitting Author has the right to grant and does grant on behalf of all authors of the Work (as defined in the below author licence), an exclusive licence and/or a non-exclusive licence for contributions from authors who are: i) UK Crown employees; ii) where BMJ has agreed a CC-BY licence shall apply, and/or iii) in accordance with the terms applicable for US Federal Government officers or employees acting as part of their official duties; on a worldwide, perpetual, irrevocable, royalty-free basis to BMJ Publishing Group Ltd ("BMJ") its licensees and where the relevant Journal is co-owned by BMJ to the co-owners of the Journal, to publish the Work in this journal and any other BMJ products and to exploit all rights, as set out in our [licence](#).

The Submitting Author accepts and understands that any supply made under these terms is made by BMJ to the Submitting Author unless you are acting as an employee on behalf of your employer or a postgraduate student of an affiliated institution which is paying any applicable article publishing charge ("APC") for Open Access articles. Where the Submitting Author wishes to make the Work available on an Open Access basis (and intends to pay the relevant APC), the terms of reuse of such Open Access shall be governed by a Creative Commons licence – details of these licences and which [Creative Commons](#) licence will apply to this Work are set out in our licence referred to above.

Other than as permitted in any relevant BMJ Author's Self Archiving Policies, I confirm this Work has not been accepted for publication elsewhere, is not being considered for publication elsewhere and does not duplicate material already published. I confirm all authors consent to publication of this Work and authorise the granting of this licence.

## Title Page

# Thrombolysis, Time-to-Treatment and In-Hospital Outcomes Among Young Adults with Ischemic Stroke in China

Hai-Yan Wang<sup>1</sup> \*; Hong-Qiu Gu<sup>2,3</sup> \*; Qi Zhou<sup>2,3</sup>; Ying-Yu Jiang<sup>2,3</sup>; Xin Yang<sup>2,3</sup>;  
Chun-Juan Wang<sup>2,3</sup>; Xing-Quan Zhao<sup>4,5</sup>; Yi-Long Wang<sup>2,4</sup>; Li-Ping Liu<sup>6</sup>; Xia Meng<sup>2</sup>;  
Hao Li<sup>2</sup>; Chelsea Liu<sup>7</sup>; Zi-Xiao Li<sup>2,3</sup>; Yong-Jun Wang<sup>2,3#</sup>; Yong Jiang<sup>2#</sup>;

<sup>1</sup>Department of Neurology, Beijing Shijitan Hospital, Capital Medical University, Beijing, China

<sup>2</sup>China National Clinical Research Center for Neurological Diseases, Beijing Tiantan Hospital, Capital Medical University, Beijing, China

<sup>3</sup>National Center for Healthcare Quality Management in Neurological Diseases, Beijing Tiantan Hospital, Capital Medical University, Beijing, China

<sup>4</sup>Vascular Neurology, Department of Neurology, Beijing Tiantan Hospital, Capital Medical University, Beijing, China

<sup>5</sup>Research Unit of Artificial Intelligence in Cerebrovascular Disease, Chinese Academy of Medical Sciences, Beijing, China

<sup>6</sup>Neuro-intensive Care Unit, Department of Neurology, Beijing Tiantan Hospital, Capital Medical University, Beijing, China

<sup>7</sup>Department of Epidemiology, Harvard T.H. Chan School of Public Health, Boston, MA, USA

<sup>8</sup>Beijing Key Laboratory of Translational Medicine for Cerebrovascular Disease, Beijing, China

<sup>9</sup>Center for Stroke, Beijing Institute for Brain Disorders, Beijing, China

\* Hai-Yan Wang and Hong-Qiu Gu contributed equally to this paper.

## #ADDRESS FOR CORRESPONDENCE

Yong-Jun Wang

China National Clinical Research Center for Neurological Diseases, Beijing Tiantan Hospital, Capital Medical University

No.119 West Road, Southern Fourth Ring Road, Fengtai District, Beijing, China,  
100070

Tel: 86-10-59975806

Email: [yongjunwang@nccrncd.org.cn](mailto:yongjunwang@nccrncd.org.cn)

1  
2  
3  
4 Yong Jiang

5 China National Clinical Research Center for Neurological Diseases, Beijing Tiantan Hospital, Capital  
6 Medical University

7  
8  
9 No.119 West Road, Southern Fourth RingRoad, Fengtai District, Beijing, China,  
10  
11 100070

12  
13 Tel: 86–10–59975806

14  
15 Email: [jiangyong@ncrcnd.org.cn](mailto:jiangyong@ncrcnd.org.cn)  
16  
17

18  
19  
20  
21 **Key words:** ischemic stroke, young stroke, thrombolysis, door-to-needle time  
22  
23

24  
25  
26 **Word Count:** 2758  
27  
28  
29  
30  
31  
32  
33  
34  
35  
36  
37  
38  
39  
40  
41  
42  
43  
44  
45  
46  
47  
48  
49  
50  
51  
52  
53  
54  
55  
56  
57  
58  
59  
60

1  
2  
3  
4  
5  
6  
7  
8  
9  
10  
11  
12  
13  
14  
15  
16  
17  
18  
19  
20  
21  
22  
23  
24  
25  
26  
27  
28  
29  
30  
31  
32  
33  
34  
35  
36  
37  
38  
39  
40  
41  
42  
43  
44  
45  
46  
47  
48  
49  
50  
51  
52  
53  
54  
55  
56  
57  
58  
59  
60

For peer review only

## ABSTRACT

**Background and purpose** We aimed to determine whether young adults (< 50 years) with acute ischemic stroke (AIS) are more likely to receive intravenous tissue plasminogen activator (IV tPA) and have shorter time to treatment than older stroke patients.

**Methods** We analyzed data from the Chinese Stroke Center Alliance (CSCA) registry for AIS patients hospitalized between August 2015 and July 2019. Patients were classified into two groups according to age: young adults (< 50 years of age) and older adults ( $\geq$  50 years of age).

**Results** Of 79 3175 patients with AIS admitted to 1471 hospitals, 9.1% (71 860) were young adults. Compared to older adults, a higher proportion of young adults received IV tPA among patients without contraindications (7.2% vs. 6.1%, adjusted odds ratio [aOR] 1.13, 95% confidence interval [CI] 1.10-1.17) and among patients without contraindications and with onset-to-door time  $\leq$ 3.5h (23.6 % vs. 19.3%, aOR 1.20, 95% CI 1.15-1.24). We did not observe differences in onset-to-needle time (median hours 2.7h) or door-to-needle time (DNT) (median minutes 60m) between young and older adults. The proportion of DNT $\leq$ 30 minutes, DNT $\leq$ 45 minutes, and DNT $\leq$ 60 minutes in young and older IV tPA treated patients were 16.9% vs 18.8%, 30.2% vs 32.8% and 50.2% vs 54.2%, respectively. Compared to older adults, young adults treated with IV tPA had lower odds of in-hospital mortality (0.5% vs 1.3%,



1  
2  
3  
4 aOR 0.54, 95% CI 0.35-0.82) and higher odds of independent ambulation at discharge  
5  
6 (61.0% vs 53.6%, aOR 1.15, 95% CI 1.08-1.22), and the associations may be partly  
7  
8 explained by stroke severity measured by NIHSS score.  
9  
10

11  
12 **Conclusion** Young adults with AIS were more likely to receive IV tPA than older  
13  
14 adults, though there was no difference between the two groups in time to treatment.  
15  
16 Compared with older adults, young adults may had better in-hospital outcomes.  
17  
18  
19  
20  
21  
22

23  
24 **Key words:** ischemic stroke, young stroke, thrombolysis, door-to-needle time  
25  
26  
27

### 28 **Strengths and limitations of this study**

- 29  
30  
31 1. We are one of the few authors to focus on the age difference in the status and  
32  
33 outcomes of intravenous thrombolysis;  
34  
35  
36 2. Our data come from the Chinese Stroke Center Alliance registry, which is a national,  
37  
38 hospital-based, multicenter, voluntary, multifaceted intervention and continuous  
39  
40 quality improvement initiative and have stronger evidence level;  
41  
42  
43 3. we believe that it is meaningful for further promotion of treatment for strokes,  
44  
45 especially for thrombolysis, because of providing a reference for the operator;  
46  
47  
48 4. Since hospital participation in the CSCA is voluntary, participating hospitals are  
49  
50 more likely to be larger, tertiary centers with a myriad of resources that smaller  
51  
52 hospitals do not have access to;  
53  
54  
55 5. We did not report data on intra-arterial (IA) therapies and puncture times.  
56  
57  
58  
59  
60

## ABBREVIATIONS

CSA: Chinese Stroke Association

CSCA: Chinese Stroke Center Alliance

QI: quality improvement

AIS: acute ischemic stroke

BMI: body mass index

mRS: modified Rankin Scale score

aOR: adjusted odds ratios

CI: confidence intervals

IV tPA: intravenous tissue plasminogen activator

IQR: interquartile range

NIHSS: National Institutes of Health Stroke Scale

DNT: door-to-needle time

sICH: symptomatic intracranial hemorrhage

## INTRODUCTION

Stroke incidence among adults under 50 years of age has risen in recent years. [1-5]

This creates a significant socioeconomic burden due to high healthcare costs and loss

of labor productivity.[5,6] According to the 2019 Chinese Stroke Statistics, 81.9% of

stroke patients had ischemic strokes,[7] of which young adults constituted 15–18%.[8]

Given this trend, researchers must carefully consider the clinical features and best

practices of treatment for strokes in young adults.[8]

Ischemic stroke is a common, preventable, and treatable disease that typically results

from thrombotic or thromboembolic blockage of a cerebral artery.[9]

Revascularization therapy plays a major role in the process of saving penumbral tissue

from infarction. [10] Tissue plasminogen activator (tPA) is the only intravenous drug

approved for the treatment of acute ischemic stroke.[11] Treatment of acute occlusive

stroke with IV tPA is considered the most regular and important method when given

within 4.5 hours of occlusion.[12,13] While epidemiological studies have been done

in other countries regarding IV tPA treatment in young AIS patients, there is limited

research on this topic in China.[13-17]

The purpose of this study was to compare the characteristics, IV tPA treatment rates,

onset-to-needle time, door-to-needle time (DNT) and in-hospital outcomes of young

(<50 years of age) and older ( $\geq$  50 years of age) AIS patients in the Chinese Stroke

Center Alliance (CSCA). We hypothesized that young AIS patients would be treated

more frequently with IV tPA, have shorter treatment time and better in-hospital

1  
2  
3  
4 outcomes compared to older adults.  
5  
6  
7  
8  
9

## 10 **METHODS**

### 11 **Data source**

12  
13  
14  
15  
16  
17 CSCA is a national, hospital-based, multicentre, voluntary, multifaceted intervention  
18  
19 and continuous quality improvement initiative. The data coordinating center of CSCA  
20  
21 resides at the China National Clinical Research Center for Neurological Diseases  
22  
23 (NCRCCND), Beijing Tiantan Hospital. [18] Trained personnel collected patient  
24  
25 demographics, medical history, medications, DNT, and in-hospital outcomes, then  
26  
27 entered this information into a database using a web-based Patient Management Tool  
28  
29 (Medicine Innovation Research Center, Beijing, China). The tool is characterized by  
30  
31 predefined logic features, range checks, and user alerts to identify a potentially invalid  
32  
33 format or value entries and to optimize data quality at the time of entry. Training in  
34  
35 the use of the tool was provided online and onsite for all users. However, data  
36  
37 collected by hospitals were not independently audited by external chart review. In  
38  
39 addition, The China National Clinical Research Center for Neurological Diseases  
40  
41 serves as the data analysis center and has an agreement to analyze the aggregate  
42  
43 deidentified data for care quality feedback and research purposes. We abstracted 838  
44  
45 229 cases and identified 793 175 patients admitted with ischemic strokes from 2015 to  
46  
47  
48  
49  
50  
51  
52  
53  
54  
55  
56  
57  
58 2019.  
59  
60

## Study population

In the first stage, our analyses included patients admitted with AIS within 7 days of the onset of symptoms between August 1, 2015 and July 31, 2019 from 1473 hospitals. We excluded patients who had in-hospital strokes (n=7941, 0.95%), were missing IV tPA information (n=17461, 2.08%), had imprecise or undocumented arrival times (n=12), transferred in from an acute care hospital (n=1777, 0.212%), or had contraindications to venous thrombolysis within the time window (n=17863, 2.13%). This yielded a population of patients with ischemic strokes with indications for thrombolysis (n=793175). To analyze DNT and in-hospital outcomes of ischemic stroke, we excluded patients treated with IV tPA more than 4.5 hours after stroke onset (n=1315, 0.17%) and patients who were not treated with IV tPA (n=743719, 93.76%). This yielded a subset of the study population that consisted of 48141 AIS patients from 1290 hospitals (Figure 1).

## Outcomes

The IV tPA treatment rate was assessed among two populations. First, IV tPA rate among patients without contraindications to thrombolytic therapy was calculated as the number of IV tPA cases divided by the total number of ischemic stroke cases without any contraindications to thrombolytic therapy. Then IV tPA rate among patients without contraindication to thrombolytic therapy and with onset-to-door time  $\leq 3.5$ h was calculated as the number of IV tPA cases divided by the total number of ischemic stroke cases without any contraindications to thrombolytic therapy and

1  
2  
3  
4 arrived at a hospital within 3.5 hours after stroke onset. The contraindications were  
5  
6 defined according to guidelines for the early management of patients with acute  
7  
8 ischemic stroke from the Heart Association/American Stroke Association and Chinese  
9  
10 Society of Neurology. DNT was defined as the time between arrival at the emergency  
11  
12 department (ED) and time of intravenous (IV) thrombolysis, and is an important  
13  
14 metric in AIS treatment.[19,20] We analyzed DNT as a binary outcome three times  
15  
16 with a different cut-off point each time ( $\leq 30$ ,  $\leq 45$ , or  $\leq 60$  minutes, respectively).  
17  
18  
19  
20  
21  
22  
23  
24  
25

26 In-hospital outcomes included symptomatic intracranial hemorrhage (sICH),  
27  
28 in-hospital mortality, and independent ambulation at discharge. sICH was defined as  
29  
30 intracranial hemorrhage (ICH) within 36 hours of admission, documented by CT or  
31  
32 MRI, with the treating physician's notes indicating clinical deterioration attributable  
33  
34 to hemorrhage. Patients who were able to walk  $< 48$  hours after hospital admission  
35  
36 were considered to have independent ambulation at discharge.  
37  
38  
39  
40  
41  
42

### 43 **Statistical analysis**

44  
45  
46 Continuous variables were expressed as medians and interquartile ranges (IQR) and  
47  
48 categorical variables as frequencies and percentages. Between-group differences for  
49  
50 young vs. older adults were analyzed using the chi-square test, two sample t-test, or  
51  
52 corresponding nonparametric tests in cases of skewed distributions that cannot be  
53  
54 normalized. For outcomes such as IV tPA treatment and in-hospital outcomes, logistic  
55  
56 regression models were performed to determine adjusted odds ratios (aORs) and 95%  
57  
58  
59  
60

1  
2  
3  
4 confidence intervals (CIs). Multivariate models were adjusted for gender, insurance  
5  
6 status, body mass index (BMI), medical history of prior stroke or transient ischemic  
7  
8 attack (TIA), coronary artery disease (CAD) or prior myocardial infarction (MI),  
9  
10 diabetes mellitus, hypertension, smoking status, atrial fibrillation/flutter, glycated  
11  
12 hemoglobin, diastolic blood pressure, systolic blood pressure, medication history  
13  
14 (hypoglycemic drugs, antihypertensive drugs, antiplatelet drugs, and lipid lowering  
15  
16 drugs), and hospital grade.  
17  
18  
19  
20  
21  
22  
23  
24

25  
26 There were few missing data for most variables, with the exceptions of the in-hospital  
27  
28 NIHSS score (missing 19.4%), DNT (6.3%), glycated hemoglobin (10.6%) and BMI  
29  
30 (1.6%). For continuous variables missing less than 15%, the median was used for  
31  
32 imputation. Since the NIHSS score is a widely used tool for assessing stroke  
33  
34 severity[21] and contributes important information to AIS prognosis,[22] sensitivity  
35  
36 analyses adjusting for the NIHSS score were conducted. Because of the large sample  
37  
38 size, some statistically significant differences may not be clinically meaningful. We  
39  
40 used absolute standardized differences (ASD) to compare differences in baseline  
41  
42 characteristics between young and older adults independent of sample size. An ASD  
43  
44 larger than 10 was considered statistically significant.[23]  
45  
46  
47  
48  
49  
50  
51  
52  
53  
54

55 All statistical analyses were performed using SAS Version 9.4 (SAS Institute, Cary,  
56  
57 NC, USA) and the %ggBaseline SAS macro.[24] Two-sided p-values of <0.05 were  
58  
59  
60

1  
2  
3  
4 considered statistically significant.  
5

## 6 **Patient and public involvement**

7  
8  
9 Patients or the public were not involved in the design, or conduct, or reporting, or  
10  
11  
12 dissemination plans of our research.  
13

## 14 **RESULTS**

15  
16  
17  
18 Of 838 229 patients with AIS in the CSCA, 793 175 patients enrolled from 1471  
19  
20  
21 hospitals were eligible for inclusion in this study. The median age was 67.0 years  
22  
23  
24 (range: 58.0-75.0) and 62.7% were men. A total of 261 760 (33.0%) patients had  
25  
26  
27 previous stroke/TIA, 69 810 (8.8%) had coronary artery disease or myocardial  
28  
29  
30 infarction (CAD/prior MI), 170 638 (21.5%) had diabetes, 510 928 (64.4%) had  
31  
32  
33 hypertension, 294 708 (37.2%) were smokers, and 40 231 (5.1%) had atrial  
34  
35  
36 fibrillation/flutter.  
37

### 38 **Clinical characteristics**

39  
40 A total of 71 860 (9.1%) patients were young adults (<50 years) and 721 315 (90.9%)  
41  
42  
43 were older adults ( $\geq$ 50 years). The median age among young adults was 45.0 (IQR  
44  
45  
46 42.0-48.0) years and 68.0 (61.0-76.0) years among older adults. A larger proportion of  
47  
48  
49 the young adults were men (76.3% vs 61.3%) and did not have health insurance  
50  
51  
52 coverage (12.9% vs 5.7%), compared to older adults. Young adults had a lower  
53  
54  
55 prevalence of cardiovascular risk factors compared to older adults, including history  
56  
57  
58 of stroke or TIA (22.5% vs 34.0%), CAD/prior MI (4.0% vs 9.3%), diabetes mellitus  
59  
60  
61 (15.3% vs 22.1%), hypertension (53.9% vs 65.5%), and atrial fibrillation (1.2% vs



5.5%). Young adults had a lower rate of medication use than older adults, including hypoglycemic drugs (10.9% vs 17.4%), antihypertensive drugs (33.5% vs 48%), antiplatelet drugs (14.6% vs 21.5%), and lipid lowering drugs (11.4% vs 15.3%). However, diastolic blood pressure in young adults was significantly higher than that of older adults (median 90.0, IQR 80.0-100.0 vs median 86.0, IQR 79.0-95.0), and young adults had a significantly higher mean BMI than older adults (median 24.2, IQR 22.6-26.4 vs median 23.7, IQR 21.7-25.4). The proportion of young adults who smoked was also higher than that of older adults (49.9% vs 35.9%) (Table 1).

**Table 1. Baseline characteristics of young and old ischemic stroke patients**

| Baseline characteristics       | Total<br>(N=793175 [100%]) | Young adults<br>(< 50 years)<br>(N=71860 [9.1%]) | Old adults<br>(≥50 years)<br>(N=721315 [90.9%]) | ASD*  |
|--------------------------------|----------------------------|--------------------------------------------------|-------------------------------------------------|-------|
| <b>Patient characteristics</b> |                            |                                                  |                                                 |       |
| Age, years                     |                            |                                                  |                                                 |       |
| Mean±SD                        | 66.1±12.0                  | 43.8±5.3                                         | 68.3±10.0                                       | 306.1 |
| Median (IQR)                   | 67.0 (58.0–75.0)           | 45.0 (42.0–48.0)                                 | 68.0 (61.0–76.0)                                |       |
| Male, n (%)                    | 496960 (62.7)              | 54850 (76.3)                                     | 442110 (61.3)                                   | 32.8  |
| Insurance status, n (%)        |                            |                                                  |                                                 |       |
| UEBMI                          | 225940 (28.5)              | 19160 (26.7)                                     | 206780 (28.7)                                   | 4.5   |
| URBMI                          | 149839 (18.9)              | 12393 (17.2)                                     | 137446 (19.1)                                   | 4.9   |
| NRCMS                          | 333979 (42.1)              | 27587 (38.4)                                     | 306392 (42.5)                                   | 8.4   |
| Self-pa                        | 50727 (6.4)                | 9263 (12.9)                                      | 41464 (5.7)                                     | 25.0  |
| Other                          | 32690 (4.1)                | 3457 (4.8)                                       | 29233 (4.1)                                     | 3.4   |
| Arrive mode, n (%)             |                            |                                                  |                                                 |       |
| Ambulance                      | 89484 (11.3)               | 7170 (10.0)                                      | 82314 (11.4)                                    | 4.5   |
| Private car                    | 372727 (47.0)              | 33340 (46.4)                                     | 339387 (47.1)                                   | 1.4   |
| Taxi                           | 68801 (8.7)                | 6743 (9.4)                                       | 62058 (8.6)                                     | 2.8   |
| Bicycle or tricycle            | 7237 (0.9)                 | 577 (0.8)                                        | 6660 (0.9)                                      | 1.1   |
| Helicopter                     | 338 (0.0)                  | 27 (0.0)                                         | 311 (0.0)                                       |       |

|    |                                               |                     |                     |                     |      |
|----|-----------------------------------------------|---------------------|---------------------|---------------------|------|
| 1  |                                               |                     |                     |                     |      |
| 2  |                                               |                     |                     |                     |      |
| 3  | Mobile stroke unit                            | 246 (0.0)           | 24 (0.0)            | 222 (0.0)           |      |
| 4  | Other                                         | 254342 (32.1)       | 23979 (33.4)        | 230363 (31.9)       | 3.2  |
| 5  |                                               |                     |                     |                     |      |
| 6  | Medical history, n (%)                        |                     |                     |                     |      |
| 7  | Previous stroke/TIA                           | 261760 (33.0)       | 16197 (22.5)        | 245563 (34.0)       | 25.8 |
| 8  | CAD/prior MI                                  | 69810 (8.8)         | 2906 (4.0)          | 66904 (9.3)         | 21.4 |
| 9  | Diabetes                                      | 170638 (21.5)       | 10985 (15.3)        | 159653 (22.1)       | 17.5 |
| 10 | Peripheral vascular disease                   | 13512 (1.7)         | 718 (1.0)           | 12794 (1.8)         | 6.8  |
| 11 | Hypertension                                  | 510928 (64.4)       | 38722 (53.9)        | 472206 (65.5)       | 23.8 |
| 12 | Smoking <sup>†</sup>                          | 294708 (37.2)       | 35848 (49.9)        | 258860 (35.9)       | 28.6 |
| 13 | Atrial fibrillation/flutter                   | 40231 (5.1)         | 886 (1.2)           | 39345 (5.5)         | 24.1 |
| 14 | Dyslipidemia                                  | 60605 (7.6)         | 5861 (8.2)          | 54744 (7.6)         | 2.2  |
| 15 | Carotid stenosis                              | 10161 (1.3)         | 509 (0.7)           | 9652 (1.3)          | 6.0  |
| 16 |                                               |                     |                     |                     |      |
| 17 | Medication history, n (%)                     |                     |                     |                     |      |
| 18 | Anticoagulants                                | 31326 (3.9)         | 2394 (3.3)          | 28932 (4.0)         | 3.7  |
| 19 | Hypoglycemic drugs                            | 133244 (16.8)       | 7802 (10.9)         | 125442 (17.4)       | 18.7 |
| 20 | Antihypertensive drugs                        | 370017 (46.7)       | 24065 (33.5)        | 345952 (48.0)       | 29.8 |
| 21 | Antiplatelet drugs                            | 165771 (20.9)       | 10482 (14.6)        | 155289 (21.5)       | 18.0 |
| 22 | Lipid lowering drugs                          | 118827 (15.0)       | 8171 (11.4)         | 110656 (15.3)       | 11.5 |
| 23 |                                               |                     |                     |                     |      |
| 24 | NIHSS score in hospital <sup>‡</sup>          |                     |                     |                     |      |
| 25 | Mean±SD                                       | 4.8±5.2             | 4.0±4.5             | 4.9±5.3             | 18.3 |
| 26 | Median (IQR)                                  | 3.0 (2.0–6.0)       | 3.0 (1.0–5.0)       | 3.0 (2.0–6.0)       |      |
| 27 |                                               |                     |                     |                     |      |
| 28 | Biochemical Indicators                        |                     |                     |                     |      |
| 29 | Glycated hemoglobin <sup>§</sup> , %          |                     |                     |                     |      |
| 30 | Mean±SD                                       | 6.2±1.7             | 6.1±1.8             | 6.3±1.7             | 11.4 |
| 31 | Median (IQR)                                  | 5.8 (5.3–6.5)       | 5.7 (5.2–6.1)       | 5.8 (5.3–6.5)       |      |
| 32 |                                               |                     |                     |                     |      |
| 33 | BMI <sup>  </sup>                             |                     |                     |                     |      |
| 34 | Mean±SD                                       | 24.0±4.3            | 24.9±4.8            | 23.9±4.2            | 22.2 |
| 35 | Median (IQR)                                  | 23.7 (21.9–25.5)    | 24.2 (22.6–26.4)    | 23.7 (21.7–25.4)    |      |
| 36 |                                               |                     |                     |                     |      |
| 37 | Homocysteine <sup>#</sup> , µmol/L            |                     |                     |                     |      |
| 38 | Mean±SD                                       | 17.2±13.5           | 17.5±14.9           | 17.2±13.4           | 2.1  |
| 39 | Median (IQR)                                  | 13.9 (10.4–19.1)    | 13.4 (10.0–19.0)    | 13.9 (10.5–19.1)    |      |
| 40 |                                               |                     |                     |                     |      |
| 41 | Systolic blood pressure <sup>* *</sup> , mmHg |                     |                     |                     |      |
| 42 | Mean±SD                                       | 150.0±23.0          | 147.9±24.4          | 150.2±22.8          | 9.7  |
| 43 | Median (IQR)                                  | 150.0 (134.0–164.0) | 145.0 (130.0–161.0) | 150.0 (135.0–164.0) |      |
| 44 |                                               |                     |                     |                     |      |
| 45 | Diastolic blood pressure <sup>††</sup> , mmHg |                     |                     |                     |      |
| 46 | Mean±SD                                       | 87.0±13.9           | 92.3±16.1           | 86.5±13.5           | 39.0 |
| 47 | Median (IQR)                                  | 86.0 (79.0–96.0)    | 90.0 (80.0–100.0)   | 86.0 (79.0–95.0)    |      |
| 48 |                                               |                     |                     |                     |      |
| 49 | Hospital characteristics, n (%)               |                     |                     |                     |      |
| 50 | Hospital level                                |                     |                     |                     |      |
| 51 |                                               |                     |                     |                     |      |
| 52 |                                               |                     |                     |                     |      |
| 53 |                                               |                     |                     |                     |      |
| 54 |                                               |                     |                     |                     |      |
| 55 |                                               |                     |                     |                     |      |
| 56 |                                               |                     |                     |                     |      |
| 57 |                                               |                     |                     |                     |      |
| 58 |                                               |                     |                     |                     |      |
| 59 |                                               |                     |                     |                     |      |
| 60 |                                               |                     |                     |                     |      |

|                    |               |              |               |      |
|--------------------|---------------|--------------|---------------|------|
| Secondary hospital | 303790 (38.3) | 23993 (33.4) | 279797 (38.8) | 11.3 |
| Tertiary hospital  | 489385 (61.7) | 47867 (66.6) | 441518 (61.2) | 11.3 |
| Hospital region    |               |              |               |      |
| Eastern China      | 365579 (46.1) | 32744 (45.6) | 332835 (46.1) | 1.0  |
| Central China      | 262618 (33.1) | 24477 (34.1) | 238141 (33.0) | 2.3  |
| Western China      | 164978 (20.8) | 14639 (20.4) | 150339 (20.8) | 1.0  |

Abbreviations: UEBMI, urban employee basic medical insurance; URBMI, urban resident basic medical insurance; NRCMS, new rural cooperative medical scheme; TIA,transient ischemic attack; CAD, coronary artery disease; MI, myocardial infarction; SD: standard deviation; IQR, interquartile range; NIHSS, National Institutes of Health Stroke Scale; ASD, absolute standardized difference.

\*: An absolute standardized difference >10 indicates significant differences between 2 groups.

†: Smoking: having smoking experience or behaviors.

‡: Information was missing for N=154052 patients (19.4%).

§: Information was missing for N=84393 patients (10.6%); median was used for imputation.

||: Information was missing for N=12698 patients (1.6%); median was used for imputation..

#: Information was missing for N= 35781 patients (4.5%).

\*\* : Information was missing for N=245 patients (≈0.0%); median was used for imputation.

††: Information was missing for N=251 patients (≈0.0%); median was used for imputation.

## IV tPA treatment rates

Young adults were treated more frequently with IV tPA than older adults among patients without contraindications to thrombolysis (7.2% vs 6.1%, aOR 1.13, 95% CI 1.10-1.17) and among patients without contraindication and with onset-to-door time  $\leq$  3.5h (23.6 % vs. 19.3%, aOR 1.20, 95% CI 1.15-1.24) . The adjusted OR of treatment with IV tPA was 1.20 (95% CI 1.16-1.24) or 1.24 (95% CI 1.20-1.29) in sensitivity analyses adjusting for NIHSS (Table 2).

**Table 2. Multivariable analysis of IV tPA treatment by age group**

| Treatment                                          | Total<br>(N=793175<br>[100%]) | Young adults<br>(< 50 years)<br>(N=71860<br>[9.1%]) | Old adults<br>(≥50 years)<br>(N=721315<br>[90.9%])(REF) | Model | OR (95% CI)      | P value |
|----------------------------------------------------|-------------------------------|-----------------------------------------------------|---------------------------------------------------------|-------|------------------|---------|
| IV tPA among patients<br>without contraindications | 49456 (6.2)                   | 5181 (7.2)                                          | 44275 (6.1)                                             | 1     | 1.19 (1.15-1.22) | <0.0001 |
|                                                    |                               |                                                     |                                                         | 2     | 1.13 (1.10-1.17) | <0.0001 |

|                                                                                           |              |             |              |   |                  |         |
|-------------------------------------------------------------------------------------------|--------------|-------------|--------------|---|------------------|---------|
|                                                                                           |              |             |              | 3 | 1.20 (1.16-1.24) | <0.0001 |
| IV tPA among patients<br>without contraindication<br>and with onset-to-door<br>time ≤3.5h | 45842 (19.7) | 4768 (23.6) | 41074 (19.3) | 1 | 1.29 (1.25-1.34) | <0.0001 |
|                                                                                           |              |             |              | 2 | 1.20 (1.15-1.24) | <0.0001 |
|                                                                                           |              |             |              | 3 | 1.24 (1.20-1.29) | <0.0001 |

Abbreviations: CI, confidence interval; IV tPA, intravenous recombinant tissue plasminogen activator; OR, odds ratio.

Model 1: Logistic regression model without adjustment.

Model 2: adjusted for gender, insurance, BMI, previous stroke/TIA, previous CAD/prior MI, diabetes, hypertension, have smoking experience or behavior, atrial fibrillation/flutter, glycated, hemoglobin, diastolic blood pressure, hypoglycemic drugs, antihypertensive drugs, antiplatelet drugs, lipid-lowering drugs, and hospital level.

Model 3: adjusted for were in-hospital NIHSS score, gender, insurance, BMI, previous stroke/TIA, previous CAD/prior MI, diabetes, hypertension, have smoking experience or behavior, atrial fibrillation/flutter, glycated hemoglobin, diastolic blood pressure, hypoglycemic drugs, antihypertensive drugs, antiplatelet drugs, lipid-lowering drugs, and hospital level. Patients (N= 154052) with missing values on NIHSS score were not included in this analysis.

## Treatment time

While young adults were more likely to receive IV tPA, there was no significant difference in onset-to-needle time (median 2.7 hours, IQR 2.0–3.5 for both groups) and DNT (median 60.0 minutes, IQR 42.0-90.0 vs median 60.0 minutes, IQR 36.0-84.0) among young and older adults. DNT was also analyzed as a binary outcome at three levels: DNT ≤30, DNT ≤45, and DNT ≤60 minutes. There were no significant differences between the two groups on any DNT level (16.9% vs 18.8%; 30.2% vs 32.8%; 50.2% vs 54.2%) (Table 3).

**Table 3. Treatment time in young and old ischemic stroke patients treated with IV tPA**

| Measures | Total<br>(N=48141 [100%]) | Young adults<br>(< 50 years)<br>(N=5044 [10.5%]) | Old adults<br>(≥50 years)<br>(N=43097 [89.5%]) | ASD* |
|----------|---------------------------|--------------------------------------------------|------------------------------------------------|------|
|----------|---------------------------|--------------------------------------------------|------------------------------------------------|------|

|                                      |                  |                  |                  |     |
|--------------------------------------|------------------|------------------|------------------|-----|
| Onset-to-needle time <sup>†</sup> ,h |                  |                  |                  |     |
| Median (IQR)                         | 2.7 (2.0–3.5)    | 2.7 (2.0–3.5)    | 2.7 (2.0–3.5)    |     |
| DNT <sup>‡</sup> ,min                |                  |                  |                  |     |
| Mean±SD                              | 66.8±44.1        | 70.8±46.8        | 66.4±43.8        | 9.7 |
| Median (IQR)                         | 60.0 (36.0–84.0) | 60.0 (42.0–90.0) | 60.0 (36.0–84.0) |     |
| Treatment time                       |                  |                  |                  |     |
| DNT≤30 minutes                       | 8938 (18.6)      | 850 (16.9)       | 8088 (18.8)      | 5.0 |
| DNT≤45 minutes                       | 15637 (32.5)     | 1521 (30.2)      | 14116 (32.8)     | 5.6 |
| DNT≤60 minutes                       | 25884 (53.8)     | 2531 (50.2)      | 23353 (54.2)     | 8.0 |

Abbreviations: CI=confidence interval; IV tPA, intravenous recombinant tissue plasminogen activator; DNT, door-to-needle time ; ASD, absolute standardized difference.

\*:An absolute standardized difference >10 indicates significant differences between 2 groups.

<sup>†</sup>: Onset-to-needle time was missing for 3818(7.9%) patients, with 431(8.5%) in age <50 and 3387(7.9%) in ≥ 50 groups.

<sup>‡</sup>DNT was missing for 3027(6.3%) patients, with 342 (6.8%) in age <50 and 2685(6.2%) in ≥ 50 groups.

## In-hospital outcomes

In-hospital outcomes including sICH, in-hospital mortality, and independent ambulation at discharge were summarized in Table 4. Multiple logistic regression with adjustments of unbalanced covariates (ASD>10% in Supplemental Table I) showed that young adults had non-significantly lower rates of sICH (0.5% vs 0.9%, aOR=0.74, 95%CI 0.49-1.11) than older adults. However, young adults had significantly lower rates of in-hospital mortality (0.5% vs 1.3%, aOR=0.54, 95%CI 0.35-0.82) and were more likely to be independently ambulating at discharge (61.0% vs 53.6%, aOR=1.15, 95%CI 1.08-1.22).

In sensitivity analyses adjusted for NIHSS scores, young adults had non-significantly lower odds of sICH (aOR=0.77, 95%CI 0.5-1.18), in-hospital mortality (aOR=0.70, 95%CI 0.46-1.09), and non-significantly higher odds of independent ambulation at

1  
2  
3  
4 discharge (aOR=1.00, 95%CI 0.93-1.08). Sensitivity analysis using different age  
5  
6 cut-off point(<35 years and  $\geq$  35 years) showed consistent results with primary  
7  
8 analysis (supplemental material table II ). But when we used another age cut of point  
9  
10 (<45 years and  $\geq$ 45 years ), we had a lower sICH rate (aOR=0.44, 95%CI 0.19-0.99)  
11  
12  
13  
14  
15 in the young group (supplemental material table III).  
16  
17  
18  
19  
20  
21  
22  
23  
24  
25  
26  
27  
28  
29  
30  
31  
32  
33  
34  
35  
36  
37  
38  
39  
40  
41  
42  
43  
44  
45  
46  
47  
48  
49  
50  
51  
52  
53  
54  
55  
56  
57  
58  
59  
60

For peer review only

**Table 4. In-hospital outcomes in young and old ischemic stroke patients treated with IV tPA**

| Outcome                             | Total<br>(N=48141 [100%]) | Young adults (< 50 years )<br>(N=5044 [10.5%]) | Old adults (≥50 years)<br>(N=43097 [89.5%])(REF) | Model | OR (95% CI)      | P value |
|-------------------------------------|---------------------------|------------------------------------------------|--------------------------------------------------|-------|------------------|---------|
| sICH                                | 414 (0.9)                 | 26 (0.5)                                       | 388 (0.9)                                        | 1     | 0.57 (0.38-0.85) | 0.0057  |
|                                     |                           |                                                |                                                  | 2     | 0.74 (0.49-1.11) | 0.1446  |
|                                     |                           |                                                |                                                  | 3     | 0.77 (0.5-1.18)  | 0.2277  |
| In-hospital mortality               | 579 (1.2)                 | 24 (0.5)                                       | 555 (1.3)                                        | 1     | 0.37 (0.24-0.55) | <0.0001 |
|                                     |                           |                                                |                                                  | 2     | 0.54 (0.35-0.82) | 0.0037  |
|                                     |                           |                                                |                                                  | 3     | 0.70 (0.46-1.09) | 0.1140  |
| Independent ambulation at discharge | 26175 (54.4)              | 3079 (61.0)                                    | 23096 (53.6)                                     | 1     | 1.36 (1.28-1.44) | <0.0001 |
|                                     |                           |                                                |                                                  | 2     | 1.15 (1.08-1.22) | <0.0001 |
|                                     |                           |                                                |                                                  | 3     | 1.00 (0.93-1.08) | 0.9490  |

Abbreviations: CI, confidence interval; IV tPA, intravenous recombinant tissue plasminogen activator ; OR, odds ratio.

Model 1: Logistic regression model without adjustment.

Model 2: Adjusted for gender, insurance, BMI, previous stroke/TIA, previous CAD/prior MI, diabetes, hypertension, have smoking experience or behavior, atrial fibrillation/flutter, glycated hemoglobin, diastolic blood pressure, systolic blood pressure, hypoglycemic drugs, antihypertensive drugs, antiplatelet drugs, and lipid-lowering drugs.

Model 3: Adjusted for in-hospital NIHSS score, gender, insurance, BMI, previous stroke/TIA, previous CAD/prior MI, diabetes, hypertension, have smoking experience or behavior, atrial fibrillation/flutter, glycated hemoglobin, diastolic blood pressure, blood pressure, hypoglycemic drugs, antihypertensive drugs, antiplatelet drugs, and lipid-lowering drugs. Patients (N= 2503) with missing values on NIHSS score were not included in this analysis.

## DISCUSSION

In this hospital-based observational study of 793 175 AIS patients, we found that young adults (<50 years of age) were more likely to be treated with IV tPA than older adults (7.2% vs 6.1%), which was consistent with our hypothesis. Our study demonstrated that young stroke patients had fewer comorbidities (previous stroke/TIA, previous CAD/prior MI, diabetes, hypertension, and atrial fibrillation/flutter) at baseline, which may compel providers to feel more secure in administering IV tPA to this group of patients. Even though we did not observe a difference in DNT between age groups, we found that young adults had more favorable in-hospital outcomes than older adults, including lower odds of sICH, in-hospital mortality and higher odds of independent ambulation at discharge, but adjusted for NIHSS scores, the results were not significant, so the associations may be explained by stroke severity measured by NIHSS score.

IV tPA thrombolytic therapy is considered to be the standard therapy in patients with acute ischemic stroke. However, its use has been studied primarily in adults over age 50.[16] Given increasing evidence in the literature that thrombolytic therapy rarely causes hemorrhages in patients with stroke-mimicking conditions, providers may also feel more comfortable administering IV tPA to young adults when it is uncertain whether a stroke or a stroke mimic had occurred.[25] Our research also supports this conclusion. Young adults had similar time to treatment and were more likely to be



1  
2  
3  
4 treated than older adults, which may reflect increased awareness among patients and  
5  
6  
7 clinicians that stroke is a potentially fatal disease affecting people of all ages.

8  
9 The relationship between time to treatment and mortality was first recognized in  
10  
11  
12 clinical studies.[26,27] The importance of this metric was reemphasized in the 2004  
13  
14  
15 American College of Cardiology/American Heart Association practice guidelines,  
16  
17  
18 which stated that DNT targets “should not be perceived as an average performance  
19  
20  
21 standard but as a goal that an early treatment system in every hospital should seek for  
22  
23  
24 every appropriate patient”. [28] Consistent with a prior analysis of SITS-ISTR  
25  
26  
27 showing no difference in median door-to-needle times between patients 18 to 50  
28  
29  
30 and >50 years of age, there was also not an obvious differentiation in treatment  
31  
32  
33 among young or older adults in our study.[15] However, a prior study by Dodds and  
34  
35  
36 colleagues found that young adults (18-40 years) with AIS were more likely to  
37  
38  
39 experience a delay in evaluation and treatment.[12] Our definition of young adults  
40  
41  
42 (age <50 years) differs from theirs (age 18–40 years) and is more applicable in China,  
43  
44  
45 which may also explain why we did not find differences in treatment times between  
46  
47  
48 the two groups.[29] Another explanation for the lack of differences in treatment times  
49  
50  
51 between the two groups may be that DNT mainly depends on hospital level and  
52  
53  
54 treatment process rather than age.

55  
56  
57 In our study, we observed a higher rate of sICH and in-hospital mortality among older  
58  
59  
60 adults treated with IV tPA, though the difference was not significant adjusted for  
NIHSS scores. We cannot entirely separate young age from lower NIHSS score, as

1  
2  
3  
4 young patients are highly correlated with lower NIHSS scores in clinical practise  
5  
6 (4.0±4.5 vs. 4.9±5.3, the Rank Biserial correlation coefficient in this study is 0.10,  
7  
8 p<0.001). Therefore, the associations may be partly explained by stroke severity  
9  
10 measured by NIHSS score. A Canadian study found that the sICH proportion among  
11  
12 younger patients did not differ from those over 50 (3% vs 4.7%, p=0.62).[16] Our  
13  
14 finding is consistent with the results of this study. But in two other studies, however,  
15  
16 younger patients treated with tPA had a lower sICH rate.[13,15] Although we do not  
17  
18 find significant differences between these two groups, we do see a trend towards  
19  
20 better outcomes in young people. One possible explanation is that younger stroke  
21  
22 patients have fewer comorbidities in their medical history, such as previous stroke or  
23  
24 TIA, CAD/MI, diabetes mellitus, hypertension, and atrial fibrillation, as well as  
25  
26 milder strokes, all of which are associated with better outcomes.[30] Other factors  
27  
28 favoring recovery in young stroke patients include greater brain plasticity and more  
29  
30 robust family and social support.[31] There could be several reasons why we didn't  
31  
32 reach the same conclusion as the two studies. Firstly, the GWTG-Stroke study had a  
33  
34 much larger sample size and used age<40 to define young adults, while the  
35  
36 SITS-ISTR study had a much higher NIHSS score and a different definition for sICH.  
37  
38 [13,15] When we used different age cut of point (<45 years and ≥45 years ), we had  
39  
40 a lower sICH rate (aOR=0.44, 95%CI 0.19-0.99) in the young group (supplemental  
41  
42 material table III). Secondly, this may also reflect, in part, that physicians in China  
43  
44 are more conservative in selecting patients for intravenous thrombolysis because of  
45  
46  
47  
48  
49  
50  
51  
52  
53  
54  
55  
56  
57  
58  
59  
60

1  
2  
3  
4 possible complications. There are several limitations in our study. Since hospital  
5  
6 participation in the CSCA is voluntary, participating hospitals are more likely to be  
7  
8 larger, tertiary centers with a myriad of resources that smaller hospitals do not have  
9  
10 access to. We recognize that findings from CSCA may not be generalizable to AIS  
11  
12 patients admitted to hospitals outside of the CSCA. Second, we did not report data on  
13  
14 intra-arterial (IA) therapies and puncture times because only a very small number of  
15  
16 patients in our study received thrombectomy. We also did not have door-to-imaging  
17  
18 data to support the study and there was a relatively high proportion of missing DNT  
19  
20 values (6.3% overall, 6.8% in young and 6.2% in older patients). However, we did not  
21  
22 observe a significant difference in DNTs between young and older AIS patients.  
23  
24 Lastly, we cannot entirely separate young age from lower NIHSS score, as younger  
25  
26 age is inherently correlated with a lower NIHSS score. Therefore, better prognosis can  
27  
28 not be fully attributed to NIHSS score nor age. But this is a real world study, which  
29  
30 represent the current situation of thrombolysis in China. It is based on these data that  
31  
32 we are constantly improving the process and quality of thrombolysis.  
33  
34  
35  
36  
37  
38  
39  
40  
41  
42  
43  
44

## 45 CONCLUSION

46  
47  
48 In summary, young adults with AIS are more likely to receive IV tPA than older  
49  
50 adults, but there is no difference between the two groups in time to treatment. Young  
51  
52 adults may have better in-hospital outcomes compared with older adults, suggesting  
53  
54 favorable effects of treatment with IV tPA.  
55  
56  
57  
58  
59  
60

## ACKNOWLEDGEMENTS

We thank the staff and participants of the CSCA (Chinese Stroke Center Alliance) studies for their contribution.

## CONTRIBUTORS

Conceived and led the project: XZ, YW, ZL, YW and YJ. Conception and design:

HW, HG, YW and YJ. Data collection and analysis: HW, XY, CW, HG and QZ.

Interpret the data: LL, XM and HL. Drafting the article and revising the content: HW,

HG, CL, JY and ZL. All authors approved the final version of the manuscript.

## FUNDING

The Chinese Stroke Center Alliance program was supported by grants from the Ministry of Science and Technology and the Ministry of Health of the People's Republic of China (National Key R&D Program of China, Code: 2016YFC0901001, 2017YFC1310901, 2016YFC0901002, 2017YFC1307905, 2015BAI12B00), Beijing Talents Project (2018A13, 2018000021223ZK03), CAMS Innovation Fund for Medical Sciences (2019-I2M-5-029), Beijing Municipal Committee of Science and Technology (Z201100005620010), Beijing Natural Science Foundation (Z200016).

## COMPETING INTERESTS

1  
2  
3 None declared.  
4  
5  
6  
7

## 8 **PATIENT CONSENT FOR PUBLICATION**

9

10 Not required.  
11  
12  
13  
14

## 15 **ETHICS APPROVAL**

16

17  
18 This study received approval from the Institutional Review Board/Ethics Committee  
19 of Beijing Tiantan Hospital, Capital Medical University with approval number KY  
20  
21 2018-061-02. Participating hospitals received research approval to collect data in  
22  
23 CSCA without requiring individual patient informed consent under the common rule  
24  
25 or a waiver of authorisation and exemption from their Institutional Review Board.  
26  
27  
28  
29  
30  
31  
32  
33  
34

## 35 **REFERENCES**

36  
37  
38

- 39 1. Béjot Y, Bailly H, Durier J, et al. Epidemiology of stroke in Europe and trends for  
40 the 21st century. *Presse Med* 2016;45:e391-8. doi: 10.1016/j.lpm.2016.10.003  
41  
42 [published Online First: 2016/11/07]  
43  
44  
45  
46 2. Hathidara MY, Saini V, Malik AM. Stroke in the young: A global update. *Current*  
47  
48 *neurology and neuroscience reports* 2019;19:91. doi: 10.1007/s11910-019-1004-1  
49  
50 [published Online First: 2019/11/27]  
51  
52  
53  
54 3. Rutten-Jacobs LC, Maaijwee NA, Arntz RM, et al. Risk factors and prognosis of  
55  
56 young stroke. The FUTURE study: a prospective cohort study. Study rationale and  
57  
58  
59  
60

1  
2  
3  
4 protocol. *BMC Neurol* 2011;11:109. doi: 10.1186/1471-2377-11-109 [published  
5  
6  
7 Online First: 2011/09/22]

8  
9 4. George MG. Risk Factors for Ischemic Stroke in Younger Adults: A Focused  
10  
11  
12 Update. *Stroke* 2020;51:729-35. doi: 10.1161/strokeaha.119.024156 [published  
13  
14  
15 Online First: 2020/02/23]

16  
17 5. Maaijwee NA, Rutten-Jacobs LC, Schaapsmeeders P, et al. Ischaemic stroke in  
18  
19  
20 young adults: risk factors and long-term consequences. *Nat Rev Neurol*  
21  
22  
23 2014;10:315-25. doi: 10.1038/nrneurol.2014.72 [published Online First: 2014/04/30]

24  
25 6. Feigin VL, Roth GA, Naghavi M, et al. Global burden of stroke and risk factors in  
26  
27  
28 188 countries, during 1990–2013: a systematic analysis for the Global Burden of  
29  
30  
31 Disease Study 2013. *The Lancet Neurology* 2016;15:913-24. doi:  
32  
33  
34 10.1016/s1474-4422(16)30073-4

35  
36 7. Wang Y-J, Li Z-X, Gu H-Q, et al. China Stroke Statistics 2019: A Report From the  
37  
38  
39 National Center for Healthcare Quality Management in Neurological Diseases, China  
40  
41  
42 National Clinical Research Center for Neurological Diseases, the Chinese Stroke  
43  
44  
45 Association, National Center for Chronic and Non-communicable Disease Control  
46  
47  
48 and Prevention, Chinese Center for Disease Control and Prevention and Institute for  
49  
50  
51 Global Neuroscience and Stroke Collaborations. *Stroke and Vascular Neurology*  
52  
53  
54 2020;5:211-39. doi: 10.1136/svn-2020-000457

55  
56 8. Singhal AB, Biller J, Elkind MS, et al. Recognition and management of stroke in  
57  
58  
59 young adults and adolescents. *Neurology* 2013;81:1089-97. doi:  
60

- 1  
2  
3  
4 10.1212/WNL.0b013e3182a4a451 [published Online First: 2013/08/16]  
5  
6  
7 9. Peña-Martínez C, Durán-Laforet V, García-Culebras A, et al. Pharmacological  
8  
9 Modulation of Neutrophil Extracellular Traps Reverses Thrombotic Stroke tPA  
10  
11 (Tissue-Type Plasminogen Activator) Resistance. *Stroke* 2019;50:3228-37. doi:  
12  
13 10.1161/strokeaha.119.026848 [published Online First: 2019/09/19]  
14  
15 10.1161/strokeaha.119.026848 [published Online First: 2019/09/19]  
16  
17 10. Martínez-Sánchez P, Díez-Tejedor E, Fuentes B, et al. Systemic Reperfusion  
18  
19 Therapy in Acute Ischemic Stroke. *Cerebrovascular Diseases* 2007;24:143-52. doi:  
20  
21 10.1159/000107390  
22  
23 10.1159/000107390  
24  
25 11. Tomsick TA. Intravenous thrombolysis for acute ischemic stroke. *J Vasc Interv*  
26  
27 *Radiol* 2004;15:S67-76. doi: 10.1097/01.rvi.0000109203.06450.e3 [published Online  
28  
29 First: 2004/04/27]  
30  
31  
32  
33 12. Kim JT, Fonarow GC, Smith EE, et al. Treatment With Tissue Plasminogen  
34  
35 Activator in the Golden Hour and the Shape of the 4.5-Hour Time-Benefit Curve in  
36  
37 the National United States Get With The Guidelines-Stroke Population. *Circulation*  
38  
39 2017;135:128-39. doi: 10.1161/circulationaha.116.023336 [published Online First:  
40  
41 2016/11/07]  
42  
43  
44  
45 13. Dodds JA, Xian Y, Sheng S, et al. Thrombolysis in young adults with stroke:  
46  
47 Findings from Get With The Guidelines-Stroke. *Neurology* 2019;92:e2784-92. doi:  
48  
49 10.1212/wnl.00000000000007653 [published Online First: 2019/05/17]  
50  
51  
52  
53 14. Papavasileiou V, Goldstein LB. Thrombolysis in young adults with acute ischemic  
54  
55 stroke. *Neurology* 2019;92:1129-30. doi: 10.1212/wnl.00000000000007651  
56  
57  
58  
59  
60

- 1  
2  
3  
4 15. Toni D, Ahmed N, Anzini A, et al. Intravenous thrombolysis in young stroke  
5  
6 patients: results from the SITS-ISTR. *Neurology* 2012;78:880-7. doi:  
7  
8 10.1212/WNL.0b013e31824d966b [published Online First: 2012/03/10]  
9  
10  
11  
12 16. Poppe AY, Buchan AM, Hill MD. Intravenous thrombolysis for acute ischaemic  
13  
14 stroke in young adult patients. *Can J Neurol Sci* 2009;36:161-7. doi:  
15  
16 10.1017/s031716710012027x [published Online First: 2009/04/22]  
17  
18  
19  
20 17. Shi J, Cao Y, You S, et al. Young Stroke Patients Treated with Intravenous  
21  
22 Thrombolysis have a More Favorable Outcome and Mortality Compared with Older  
23  
24 Patients. *Curr Neurovasc Res* 2017;14:141-48. doi:  
25  
26 10.2174/1567202614666170328095431 [published Online First: 2017/03/31]  
27  
28  
29  
30 18. Wang Y, Li Z, Wang Y, et al. Chinese Stroke Center Alliance: a national effort to  
31  
32 improve healthcare quality for acute stroke and transient ischaemic attack: rationale,  
33  
34 design and preliminary findings. *Stroke Vasc Neurol* 2018;3:256-62. doi:  
35  
36 10.1136/svn-2018-000154 [published Online First: 2019/01/15]  
37  
38  
39  
40 19. Hsieh CY, Chen WF, Chen CH, et al. Efforts to reduce the door-to-needle time of  
41  
42 thrombolysis in acute ischemic stroke: video-assisted therapeutic risk communication.  
43  
44 *J Formos Med Assoc* 2014;113:929-33. doi: 10.1016/j.jfma.2013.11.012 [published  
45  
46 Online First: 2014/01/15]  
47  
48  
49  
50 20. van Tuijn CF, Luitse JS, van der Valk M, et al. Reduction of the door-to-needle  
51  
52 time for administration of antibiotics in patients with a severe infection: a tailored  
53  
54 intervention project. *Neth J Med* 2010;68:123-7.  
55  
56  
57  
58  
59  
60



- 1  
2  
3  
4 21. Habib M, Karim ASMR, Hossain MM, et al. Assessment of Initial Stroke Severity  
5  
6 by National Institute Health Stroke Scale (NIHSS) Score at Admission. *Journal of*  
7  
8 *Dhaka Medical College* 2018;26:90-93. doi: 10.3329/jdmc.v26i2.38765  
9  
10  
11  
12 22. Chen X, Zhan X, Chen M, et al. The prognostic value of combined NT-pro-BNP  
13  
14 levels and NIHSS scores in patients with acute ischemic stroke. *Intern Med*  
15  
16 2012;51:2887-92. doi: 10.2169/internalmedicine.51.8027 [published Online First:  
17  
18 2012/10/16]  
19  
20  
21  
22  
23 23. Austin PC. Balance diagnostics for comparing the distribution of baseline  
24  
25 covariates between treatment groups in propensity-score matched samples. *Stat Med*  
26  
27 2009;28:3083-107. doi: 10.1002/sim.3697 [published Online First: 2009/09/17]  
28  
29  
30  
31 24. Gu HQ, Li DJ, Liu C, et al. %ggBaseline: a SAS macro for analyzing and  
32  
33 reporting baseline characteristics automatically in medical research. *Ann Transl Med*  
34  
35 2018;6:326. doi: 10.21037/atm.2018.08.13 [published Online First: 2018/10/27]  
36  
37  
38  
39 25. Zinkstok SM, Engelter ST, Gensicke H, et al. Safety of thrombolysis in stroke  
40  
41 mimics: results from a multicenter cohort study. *Stroke* 2013;44:1080-4. doi:  
42  
43 10.1161/STROKEAHA.111.000126  
44  
45  
46  
47 26. Cannon CP, Gibson CM, Lambrew CT, et al. Relationship of  
48  
49 symptom-onset-to-balloon time and door-to-balloon time with mortality in patients  
50  
51 undergoing angioplasty for acute myocardial infarction. *Jama* 2000;283:2941-7. doi:  
52  
53 10.1001/jama.283.22.2941 [published Online First: 2000/06/24]  
54  
55  
56  
57  
58 27. Schull MJ, Vermeulen M, Donovan L, et al. Can the wrong statistic be bad for  
59  
60

1  
2  
3  
4 health? Improving the reporting of door-to-needle time performance in acute  
5  
6 myocardial infarction. *Am Heart J* 2005;150:583-7. doi: 10.1016/j.ahj.2005.03.061

7  
8  
9 [published Online First: 2005/09/20]

10  
11  
12 28. Antman EM, Anbe DT, Armstrong PW, et al. ACC/AHA guidelines for the  
13  
14 management of patients with ST-elevation myocardial infarction--executive summary:  
15  
16 a report of the American College of Cardiology/American Heart Association Task  
17  
18 Force on Practice Guidelines (Writing Committee to Revise the 1999 Guidelines for  
19  
20 the Management of Patients With Acute Myocardial Infarction). *Circulation*  
21  
22 2004;110:588-636. doi: 10.1161/01.Cir.0000134791.68010.Fa [published Online First:  
23  
24 2004/08/04]

25  
26 29. Xiaobing Z SH, Li'an H. Clinical investigation of stroke in young and  
27  
28 middle-aged adults. *Cerebrovascular Diseases Foreign Medical Sciences*  
29  
30 2004;012:354-7.

31  
32 30. Arnold M, Halpern M, Meier N, et al. Age-dependent differences in demographics,  
33  
34 risk factors, co-morbidity, etiology, management, and clinical outcome of acute  
35  
36 ischemic stroke. *Journal of Neurology* 2008;255:1503-07. doi:  
37  
38 10.1007/s00415-008-0949-9

39  
40 31. Popa-Wagner A, Carmichael ST, Kokaia Z, et al. The response of the aged brain  
41  
42 to stroke: too much, too soon? *Curr Neurovasc Res* 2007;4:216-27. doi:  
43  
44 10.2174/156720207781387213 [published Online First: 2007/08/19]

45  
46  
47  
48  
49  
50  
51  
52  
53  
54  
55  
56  
57  
58  
59 **Figure legend**  
60

1  
2  
3  
4  
5  
6  
7  
8  
9  
10  
11  
12  
13  
14  
15  
16  
17  
18  
19  
20  
21  
22  
23  
24  
25  
26  
27  
28  
29  
30  
31  
32  
33  
34  
35  
36  
37  
38  
39  
40  
41  
42  
43  
44  
45  
46  
47  
48  
49  
50  
51  
52  
53  
54  
55  
56  
57  
58  
59  
60

Figure 1. Study flowchart for patients identification.

Abbreviations: IV tPA, intravenous tissue plasminogen activator.

For peer review only

**Source population**

Admission (N=838229)  
Hospital (N=1473)  
August 1, 2015 to July 31, 2019

Excluded (n=45054)

- In-hospital stroke (7941)
- Missing IV tPA information (17461)
- Missing arrival time (12)
- Transferred in from acute care hospital (1777)
- Contraindications to venous thrombolysis within a time window (17863)

**Analysis of outcomes in all ischemic stroke**

Admission (N=793175)  
Hospital (N=1471)

Excluding (n=745034)

- Treated with tPA but >4.5h (1315) Not
- treated with tPA (743719)

**Analysis of treatment times, and outcomes in patients treated with tPA within 4.5 hours**

Admission (N=48141)  
Hospital (N=1290)

## Supplemental Material

1

2

3 Table I . Baseline characteristics of young and old ischemic stroke patients with IV tPA treatment

4

| 5 Baseline characteristics     | Total<br>(N=48141 [100%]) | Young adults<br>(< 50 years)<br>(N=5044 [10.5%]) | Old adults (≥50 years)<br>(N=43097 [89.5%]) | ASD*  |
|--------------------------------|---------------------------|--------------------------------------------------|---------------------------------------------|-------|
| 8 Patient characteristics      |                           |                                                  |                                             |       |
| 9 Age, years                   |                           |                                                  |                                             |       |
| 10 Mean±SD                     | 65.2±12.1                 | 43.4±5.6                                         | 67.8±9.8                                    | 305.7 |
| 11 Median (IQR)                | 66.0 (57.0–74.0)          | 45.0 (41.0–48.0)                                 | 68.0 (60.0–75.0)                            |       |
| 12 Male, n (%)                 | 31456 (65.3)              | 3961 (78.5)                                      | 27495 (63.8)                                | 32.9  |
| 13 Insurance status, n (%)     |                           |                                                  |                                             |       |
| 14 UEBMI                       | 15948 (33.1)              | 1609 (31.9)                                      | 14339 (33.3)                                | 3.0   |
| 15 URBMI                       | 9813 (20.4)               | 913 (18.1)                                       | 8900 (20.7)                                 | 6.6   |
| 16 NRCMS                       | 16442 (34.2)              | 1495 (29.6)                                      | 14947 (34.7)                                | 10.9  |
| 17 Self-pa                     | 4083 (8.5)                | 813 (16.1)                                       | 3270 (7.6)                                  | 26.5  |
| 18 Other                       | 1855 (3.9)                | 214 (4.2)                                        | 1641 (3.8)                                  | 2.0   |
| 19 Arrive mode, n (%)          |                           |                                                  |                                             |       |
| 20 Ambulance                   | 14364 (29.8)              | 1352 (26.8)                                      | 13012 (30.2)                                | 7.5   |
| 21 Private car                 | 21213 (44.1)              | 2240 (44.4)                                      | 18973 (44.0)                                | 0.8   |
| 22 Taxi                        | 2539 (5.3)                | 357 (7.1)                                        | 2182 (5.1)                                  | 8.4   |
| 23 Bicycle or tricycle         | 118 (0.2)                 | 7 (0.1)                                          | 111 (0.3)                                   | 4.5   |
| 24 Helicopter                  | 14 (0.0)                  | 1 (0.0)                                          | 13 (0.0)                                    |       |
| 25 Mobile stroke unit          | 31 (0.1)                  | 4 (0.1)                                          | 27 (0.1)                                    | 0.0   |
| 26 Other                       | 9862 (20.5)               | 1083 (21.5)                                      | 8779 (20.4)                                 | 2.7   |
| 27 Medical history, n (%)      |                           |                                                  |                                             |       |
| 28 Previous stroke/TIA         | 12339 (25.6)              | 830 (16.5)                                       | 11509 (26.7)                                | 25.0  |
| 29 CAD/prior MI                | 4737 (9.8)                | 240 (4.8)                                        | 4497 (10.4)                                 | 21.3  |
| 30 Diabetes                    | 8477 (17.6)               | 516 (10.2)                                       | 7961 (18.5)                                 | 23.8  |
| 31 Peripheral vascular disease | 628 (1.3)                 | 31 (0.6)                                         | 597 (1.4)                                   | 8.0   |
| 32 Hypertension                | 28815 (59.9)              | 2283 (45.3)                                      | 26532 (61.6)                                | 33.1  |
| 33 Smoking†                    | 18835 (39.1)              | 2567 (50.9)                                      | 16268 (37.7)                                | 26.8  |
| 34 Atrial fibrillation/flutter | 5692 (11.8)               | 138 (2.7)                                        | 5554 (12.9)                                 | 38.7  |
| 35 Dyslipidemia                | 3195 (6.6)                | 351 (7.0)                                        | 2844 (6.6)                                  | 1.6   |
| 36 Carotid stenosis            | 454 (0.9)                 | 22 (0.4)                                         | 432 (1.0)                                   | 7.2   |
| 37 Medication history, n (%)   |                           |                                                  |                                             |       |
| 38 Anticoagulants              | 1779 (3.7)                | 150 (3.0)                                        | 1629 (3.8)                                  | 4.4   |
| 39 Hypoglycemic drugs          | 6404 (13.3)               | 330 (6.5)                                        | 6074 (14.1)                                 | 25.2  |
| 40 Antihypertensive drugs      | 20099 (41.8)              | 1302 (25.8)                                      | 18797 (43.6)                                | 38.1  |
| 41 Antiplatelet drugs          | 7882 (16.4)               | 467 (9.3)                                        | 7415 (17.2)                                 | 23.5  |
| 42 Lipid lowering drugs        | 5614 (11.7)               | 382 (7.6)                                        | 5232 (12.1)                                 | 15.1  |
| 43 NIHSS score in hospital‡    |                           |                                                  |                                             |       |
| 44 Mean±SD                     | 7.9±6.5                   | 6.4±5.3                                          | 8.0±6.6                                     | 26.7  |
| 45 Median (IQR)                | 6.0 (3.0–11.0)            | 5.0 (3.0–9.0)                                    | 6.0 (3.0–12.0)                              |       |

60

(Continued)

Table I . Baseline characteristics of young and old ischemic stroke patients with IV tPA treatment

| Baseline characteristics                      | Total<br>(N=48141 [100%]) | Young adults<br>(< 50 years)<br>(N=5044 [10.5%]) | Old adults (≥50 years)<br>(N=43097 [89.5%]) | ASD* |
|-----------------------------------------------|---------------------------|--------------------------------------------------|---------------------------------------------|------|
| <b>Biochemical Indicators</b>                 |                           |                                                  |                                             |      |
| Glycated hemoglobins,%                        |                           |                                                  |                                             |      |
| Mean±SD                                       | 6.2±1.6                   | 5.9±1.5                                          | 6.2±1.6                                     | 19.3 |
| Median (IQR)                                  | 5.8 (5.3–6.4)             | 5.6 (5.1–6.0)                                    | 5.8 (5.3–6.5)                               |      |
| BMI <sup>  </sup>                             |                           |                                                  |                                             |      |
| Mean±SD                                       | 23.6±4.2                  | 24.9±5.5                                         | 23.4±4.0                                    | 31.2 |
| Median (IQR)                                  | 23.4 (21.1–25.5)          | 24.4 (22.3–26.8)                                 | 23.2 (21.0–25.4)                            |      |
| Homocysteine <sup>#</sup> , μmol/L            |                           |                                                  |                                             |      |
| Mean±SD                                       | 16.7±13.1                 | 17.4±14.8                                        | 16.6±12.9                                   | 5.8  |
| Median (IQR)                                  | 13.3 (10.0–18.5)          | 12.7 (9.6–18.9)                                  | 13.3 (10.1–18.5)                            |      |
| Systolic blood pressure** , mmHg              |                           |                                                  |                                             |      |
| Mean±SD                                       | 152.5±23.8                | 148.3±24.6                                       | 153.0±23.7                                  | 19.5 |
| Median (IQR)                                  | 150.0 (136.0–168.0)       | 145.0 (130.0–163.0)                              | 151.0 (137.0–168.0)                         |      |
| Diastolic blood pressure <sup>††</sup> , mmHg |                           |                                                  |                                             |      |
| Mean±SD                                       | 87.6±14.5                 | 92.1±16.1                                        | 87.1±14.2                                   | 32.9 |
| Median (IQR)                                  | 87.0 (79.0–97.0)          | 90.0 (80.0–101.0)                                | 86.0 (78.0–96.0)                            |      |
| <b>Hospital characteristics, n (%)</b>        |                           |                                                  |                                             |      |
| Hospital level                                |                           |                                                  |                                             |      |
| Secondary hospital                            | 16479 (34.2)              | 1735 (34.4)                                      | 14744 (34.2)                                | 0.4  |
| Tertiary hospital                             | 31662 (65.8)              | 3309 (65.6)                                      | 28353 (65.8)                                | 0.4  |
| Hospital region                               |                           |                                                  |                                             |      |
| Eastern China                                 | 26410 (54.9)              | 2792 (55.4)                                      | 23618 (54.8)                                | 1.2  |
| Central China                                 | 15024 (31.2)              | 1630 (32.3)                                      | 13394 (31.1)                                | 2.6  |
| Western China                                 | 6707 (13.9)               | 622 (12.3)                                       | 6085 (14.1)                                 | 5.3  |

Abbreviations: IV tPA, intravenous recombinant tissue plasminogen activator; UEBMI, urban employee basic medical insurance; URBMI, urban resident basic medical insurance; NRCMS, new rural cooperative medical scheme; TIA, transient ischemic attack; CAD, coronary artery disease; MI, myocardial infarction; SD: standard deviation; IQR, interquartile range; NIHSS, National Institutes of Health Stroke Scale; ASD, absolute standardized difference.

\*: An absolute standardized difference >10 indicates significant differences between 2 groups.

†: Smoking: having smoking experience or behaviors.

†: Information was missing for N = 2503 patients (5.2%).

§: Information was missing for N =4749 patients (9.9%), using the median for imputation.

||: Information was missing for N =743 patients (1.5%), using the median for imputation.

#: Information was missing for N = 2682 patients (5.6%).

\*\* : Information was missing for N =28 patients (0.1 %), using the median for imputation.

††: Information was missing for N =28 patients (0.1%), using the median for imputation.

Table II . In-hospital outcomes in young(< 35 years ) and old (≥35 years) ischemic stroke patients treated with IV tPA

| Outcome                                | Total<br>(N=48141 [100%]) | young adults<br>(< 35 years )<br>(N=456 [0.9%]) | old adults (≥35 years)<br>(N=47685[99.1%])(REF) | Model | OR (95% CI)      | P value |
|----------------------------------------|---------------------------|-------------------------------------------------|-------------------------------------------------|-------|------------------|---------|
| sICH                                   | 414 (0.9)                 | 4 (0.9)                                         | 410 (0.9)                                       | 1     | 1.02 (0.38-2.74) | 0.9678  |
|                                        |                           |                                                 |                                                 | 2     | 1.45 (0.54-3.94) | 0.4612  |
|                                        |                           |                                                 |                                                 | 3     | 1.52 (0.56-4.13) | 0.4136  |
| In-hospital mortality                  | 579 (1.2)                 | 1 (0.2)                                         | 578 (1.2)                                       | 1     | 0.18 (0.03-1.28) | 0.0861  |
|                                        |                           |                                                 |                                                 | 2     | 0.28 (0.04-2.01) | 0.2066  |
|                                        |                           |                                                 |                                                 | 3     | 0.27 (0.04-1.97) | 0.1953  |
| Independent ambulation<br>at discharge | 26175 (54.4)              | 279 (61.2)                                      | 25896 (54.3)                                    | 1     | 1.33 (1.10-1.60) | 0.0034  |
|                                        |                           |                                                 |                                                 | 2     | 1.09 (0.90-1.32) | 0.384   |
|                                        |                           |                                                 |                                                 | 3     | 1.15 (0.92-1.42) | 0.2173  |

Abbreviations: CI, confidence interval; IV tPA, intravenous recombinant tissue plasminogen activator ; OR, odds ratio.

Model 1: Logistic regression model without adjustment.

Model 2: Adjusted for gender, insurance, BMI, previous stroke/TIA, previous CAD/prior MI, diabetes, hypertension, have smoking experience or behavior, atrial fibrillation/flutter, glyated hemoglobin, diastolic blood pressure, systolic blood pressure, hypoglycemic drugs, antihypertensive drugs, antiplatelet drugs,and lipid-lowering drugs.

Model 3: Adjusted for in-hospital NIHSS score, gender, insurance, BMI, previous stroke/TIA, previous CAD/prior MI, diabetes, hypertension, have smoking experience or behavior, atrial fibrillation/flutter, glyated hemoglobin, diastolic blood pressure, blood pressure, hypoglycemic drugs, antihypertensive drugs, antiplatelet drugs, and lipid-lowering drugs. Patients (N= 2503) with missing values on NIHSS score were not included in this analysis.

Table III. In-hospital outcomes in young (&lt; 45 years ) and old (≥45 years) ischemic stroke patients treated with IV tPA

| Outcome                                | Total<br>(N=48141 [100%]) | young adults<br>(< 45 years )<br>(N=2244 [4.7%]) | old adults (≥45 years)<br>(N=45897[95.3%])(REF) | Model | OR (95% CI)      | P value |
|----------------------------------------|---------------------------|--------------------------------------------------|-------------------------------------------------|-------|------------------|---------|
| sICH                                   | 414 (0.9)                 | 8 (0.4)                                          | 406 (0.9)                                       | 1     | 0.40 (0.20-0.81) | 0.0106  |
|                                        |                           |                                                  |                                                 | 2     | 0.54 (0.26-1.10) | 0.0877  |
|                                        |                           |                                                  |                                                 | 3     | 0.44 (0.19-0.99) | 0.048   |
| In-hospital mortality                  | 579 (1.2)                 | 8 (0.4)                                          | 571 (1.2)                                       | 1     | 0.28 (0.14-0.57) | 0.0004  |
|                                        |                           |                                                  |                                                 | 2     | 0.43 (0.21-0.87) | 0.0197  |
|                                        |                           |                                                  |                                                 | 3     | 0.52 (0.26-1.07) | 0.077   |
| Independent ambulation<br>at discharge | 26175 (54.4)              | 1356 (60.4)                                      | 24819 (54.1)                                    | 1     | 1.30 (1.19-1.41) | <0.0001 |
|                                        |                           |                                                  |                                                 | 2     | 1.08 (0.98-1.18) | 0.1082  |
|                                        |                           |                                                  |                                                 | 3     | 0.97 (0.88-1.08) | 0.6096  |

Abbreviations: CI, confidence interval; IV tPA, intravenous recombinant tissue plasminogen activator ; OR, odds ratio.

Model 1: Logistic regression model without adjustment.

Model 2: Adjusted for gender, insurance, BMI, previous stroke/TIA, previous CAD/prior MI, diabetes, hypertension, have smoking experience or behavior, atrial fibrillation/flutter, glyated hemoglobin, diastolic blood pressure, systolic blood pressure, hypoglycemic drugs, antihypertensive drugs, antiplatelet drugs, and lipid-lowering drugs.

Model 3: Adjusted for in-hospital NIHSS score, gender, insurance, BMI, previous stroke/TIA, previous CAD/prior MI, diabetes, hypertension, have smoking experience or behavior, atrial fibrillation/flutter, glyated hemoglobin, diastolic blood pressure, blood pressure, hypoglycemic drugs, antihypertensive drugs, antiplatelet drugs, and lipid-lowering drugs. Patients (N= 2503) with missing values on NIHSS score were not included in this analysis.



# BMJ Open

## Thrombolysis, Time-to-Treatment and In-Hospital Outcomes Among Young Adults with Ischemic Stroke in China: Findings from a Nationwide Registry Study in China

|                               |                                                                                                                                                                                                                                                                                                                                                                                                                                                                                                                                                                                                                                                                                                                                                                                                                                                                                                                                                                                                                                                                                                                                                                                                                                                                                                                                                                                                                                                                                                                                                                                                                                                                                                                                                                                                                                                                                                                                                                                                                                                                                                                                                                                                                                                                                                                                                                                                                                                                                                         |
|-------------------------------|---------------------------------------------------------------------------------------------------------------------------------------------------------------------------------------------------------------------------------------------------------------------------------------------------------------------------------------------------------------------------------------------------------------------------------------------------------------------------------------------------------------------------------------------------------------------------------------------------------------------------------------------------------------------------------------------------------------------------------------------------------------------------------------------------------------------------------------------------------------------------------------------------------------------------------------------------------------------------------------------------------------------------------------------------------------------------------------------------------------------------------------------------------------------------------------------------------------------------------------------------------------------------------------------------------------------------------------------------------------------------------------------------------------------------------------------------------------------------------------------------------------------------------------------------------------------------------------------------------------------------------------------------------------------------------------------------------------------------------------------------------------------------------------------------------------------------------------------------------------------------------------------------------------------------------------------------------------------------------------------------------------------------------------------------------------------------------------------------------------------------------------------------------------------------------------------------------------------------------------------------------------------------------------------------------------------------------------------------------------------------------------------------------------------------------------------------------------------------------------------------------|
| Journal:                      | <i>BMJ Open</i>                                                                                                                                                                                                                                                                                                                                                                                                                                                                                                                                                                                                                                                                                                                                                                                                                                                                                                                                                                                                                                                                                                                                                                                                                                                                                                                                                                                                                                                                                                                                                                                                                                                                                                                                                                                                                                                                                                                                                                                                                                                                                                                                                                                                                                                                                                                                                                                                                                                                                         |
| Manuscript ID                 | bmjopen-2021-055055.R1                                                                                                                                                                                                                                                                                                                                                                                                                                                                                                                                                                                                                                                                                                                                                                                                                                                                                                                                                                                                                                                                                                                                                                                                                                                                                                                                                                                                                                                                                                                                                                                                                                                                                                                                                                                                                                                                                                                                                                                                                                                                                                                                                                                                                                                                                                                                                                                                                                                                                  |
| Article Type:                 | Original research                                                                                                                                                                                                                                                                                                                                                                                                                                                                                                                                                                                                                                                                                                                                                                                                                                                                                                                                                                                                                                                                                                                                                                                                                                                                                                                                                                                                                                                                                                                                                                                                                                                                                                                                                                                                                                                                                                                                                                                                                                                                                                                                                                                                                                                                                                                                                                                                                                                                                       |
| Date Submitted by the Author: | 20-Jan-2022                                                                                                                                                                                                                                                                                                                                                                                                                                                                                                                                                                                                                                                                                                                                                                                                                                                                                                                                                                                                                                                                                                                                                                                                                                                                                                                                                                                                                                                                                                                                                                                                                                                                                                                                                                                                                                                                                                                                                                                                                                                                                                                                                                                                                                                                                                                                                                                                                                                                                             |
| Complete List of Authors:     | <p>Wang, HaiYan; Capital Medical University Affiliated Beijing Shijitan Hospital, Department of Neurology</p> <p>Gu, Hongqiu; Beijing Tiantan Hospital, China National Clinical Research Center for Neurological Diseases; Beijing Tiantan Hospital, National Center for Healthcare Quality Management in Neurological Diseases</p> <p>Zhou, Qi; Beijing Tiantan Hospital, China National Clinical Research Center for Neurological Diseases; Beijing Tiantan Hospital, National Center for Healthcare Quality Management in Neurological Diseases</p> <p>Jiang, YingYu; Beijing Tiantan Hospital, China National Clinical Research Center for Neurological Diseases; Beijing Tiantan Hospital, National Center for Healthcare Quality Management in Neurological Diseases</p> <p>Yang, Xin; Beijing Tiantan Hospital, China National Clinical Research Center for Neurological Diseases; Beijing Tiantan Hospital, National Center for Healthcare Quality Management in Neurological Diseases</p> <p>Wang, Chunjuan; Beijing Tiantan Hospital, China National Clinical Research Center for Neurological Diseases; Beijing Tiantan Hospital, National Center for Healthcare Quality Management in Neurological Diseases</p> <p>Zhao, Xingquan; Beijing Tiantan Hospital, Vascular Neurology, Department of Neurology; Research Unit of Artificial Intelligence in Cerebrovascular Disease, Chinese Academy of Medical Sciences</p> <p>Wang, Yilong; Beijing Tiantan Hospital, China National Clinical Research Center for Neurological Diseases; Beijing Tiantan Hospital, Vascular Neurology, Department of Neurology</p> <p>Liu, Liping; Beijing Tiantan Hospital, Neuro-intensive Care Unit, Department of Neurology</p> <p>Meng, Xia; Beijing Tiantan Hospital, China National Clinical Research Center for Neurological Diseases</p> <p>Li, Hao; Beijing Tiantan Hospital, China National Clinical Research Center for Neurological Diseases</p> <p>Liu, Chelsea; Harvard University T H Chan School of Public Health, Department of Epidemiology</p> <p>Li, Zixiao; Beijing Tiantan Hospital, China National Clinical Research Center for Neurological Diseases; Beijing Tiantan Hospital, National Center for Healthcare Quality Management in Neurological Diseases</p> <p>Wang, Yongjun; Beijing Tiantan Hospital, China National Clinical Research Center for Neurological Diseases; Beijing Tiantan Hospital, National Center for Healthcare Quality Management in Neurological Diseases</p> |

1  
2  
3  
4  
5  
6  
7  
8  
9  
10  
11  
12  
13  
14  
15  
16  
17  
18  
19  
20  
21  
22  
23  
24  
25  
26  
27  
28  
29  
30  
31  
32  
33  
34  
35  
36  
37  
38  
39  
40  
41  
42  
43  
44  
45  
46  
47  
48  
49  
50  
51  
52  
53  
54  
55  
56  
57  
58  
59  
60

|                                  |                                                                                                          |
|----------------------------------|----------------------------------------------------------------------------------------------------------|
|                                  | Jiang, Yong; Beijing Tiantan Hospital, China National Clinical Research Center for Neurological Diseases |
| <b>Primary Subject Heading</b> : | Neurology                                                                                                |
| Secondary Subject Heading:       | Public health                                                                                            |
| Keywords:                        | Adult neurology < NEUROLOGY, Stroke < NEUROLOGY, VASCULAR MEDICINE                                       |
|                                  |                                                                                                          |

SCHOLARONE™  
Manuscripts

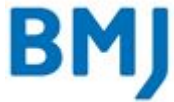

I, the Submitting Author has the right to grant and does grant on behalf of all authors of the Work (as defined in the below author licence), an exclusive licence and/or a non-exclusive licence for contributions from authors who are: i) UK Crown employees; ii) where BMJ has agreed a CC-BY licence shall apply, and/or iii) in accordance with the terms applicable for US Federal Government officers or employees acting as part of their official duties; on a worldwide, perpetual, irrevocable, royalty-free basis to BMJ Publishing Group Ltd ("BMJ") its licensees and where the relevant Journal is co-owned by BMJ to the co-owners of the Journal, to publish the Work in this journal and any other BMJ products and to exploit all rights, as set out in our [licence](#).

The Submitting Author accepts and understands that any supply made under these terms is made by BMJ to the Submitting Author unless you are acting as an employee on behalf of your employer or a postgraduate student of an affiliated institution which is paying any applicable article publishing charge ("APC") for Open Access articles. Where the Submitting Author wishes to make the Work available on an Open Access basis (and intends to pay the relevant APC), the terms of reuse of such Open Access shall be governed by a Creative Commons licence – details of these licences and which [Creative Commons](#) licence will apply to this Work are set out in our licence referred to above.

Other than as permitted in any relevant BMJ Author's Self Archiving Policies, I confirm this Work has not been accepted for publication elsewhere, is not being considered for publication elsewhere and does not duplicate material already published. I confirm all authors consent to publication of this Work and authorise the granting of this licence.

## Title Page

# Thrombolysis, Time-to-Treatment and In-Hospital Outcomes Among Young Adults with Ischemic Stroke in China: Findings from a Nationwide Registry Study in China

Hai-Yan Wang <sup>1</sup> \*; Hong-Qiu Gu <sup>2,3</sup> \*; Qi Zhou <sup>2,3</sup>; Ying-Yu Jiang <sup>2,3</sup>; Xin Yang <sup>2,3</sup>; Chun-Juan Wang <sup>2,3</sup>; Xing-Quan Zhao <sup>4,5</sup>; Yi-Long Wang <sup>2,4</sup>; Li-Ping Liu <sup>6</sup>; Xia Meng <sup>2</sup>; Hao Li <sup>2</sup>; Chelsea Liu <sup>7</sup>; Zi-Xiao Li <sup>2,3</sup>; Yong-Jun Wang <sup>2,3</sup>; Yong Jiang <sup>2</sup> #;

<sup>1</sup>Department of Neurology, Beijing Shijitan Hospital, Capital Medical University, Beijing, China

<sup>2</sup>China National Clinical Research Center for Neurological Diseases, Beijing Tiantan Hospital, Capital Medical University, Beijing, China

<sup>3</sup>National Center for Healthcare Quality Management in Neurological Diseases, Beijing Tiantan Hospital, Capital Medical University, Beijing, China

<sup>4</sup>Vascular Neurology, Department of Neurology, Beijing Tiantan Hospital, Capital Medical University, Beijing, China

<sup>5</sup>Research Unit of Artificial Intelligence in Cerebrovascular Disease, Chinese Academy of Medical Sciences, Beijing, China

<sup>6</sup>Neuro-intensive Care Unit, Department of Neurology, Beijing Tiantan Hospital, Capital Medical University, Beijing, China

<sup>7</sup>Department of Epidemiology, Harvard T.H. Chan School of Public Health, Boston, MA, USA

<sup>8</sup>Beijing Key Laboratory of Translational Medicine for Cerebrovascular Disease, Beijing, China

<sup>9</sup>Center for Stroke, Beijing Institute for Brain Disorders, Beijing, China

\* Hai-Yan Wang and Hong-Qiu Gu contributed equally to this paper.

## #ADDRESS FOR CORRESPONDENCE

Yong Jiang

China National Clinical Research Center for Neurological Diseases, Beijing Tiantan Hospital, Capital Medical University

No.119 West Road, Southern Fourth Ring Road, Fengtai District, Beijing, China, 100070

1  
2  
3  
4 Tel: 86-10-59975806

5  
6 Email: [jiangyong@ncrcnd.org.cn](mailto:jiangyong@ncrcnd.org.cn)  
7  
8  
9

10  
11 **Key words:** ischemic stroke, young stroke, thrombolysis, door-to-needle time  
12  
13  
14  
15

16  
17 **Word Count:** 2612  
18  
19  
20  
21  
22  
23  
24  
25  
26  
27  
28  
29  
30  
31  
32  
33  
34  
35  
36  
37  
38  
39  
40  
41  
42  
43  
44  
45  
46  
47  
48  
49  
50  
51  
52  
53  
54  
55  
56  
57  
58  
59  
60

For peer review only

## ABSTRACT

**Background and purpose** We aimed to determine whether young adults (< 50 years) with acute ischemic stroke (AIS) are more likely to receive intravenous tissue plasminogen activator (IV tPA) and have shorter time to treatment than older stroke patients.

**Methods** We analyzed data from the Chinese Stroke Center Alliance (CSCA) registry for AIS patients hospitalized between August 2015 and July 2019. Patients were classified into two groups according to age: young adults (< 50 years of age) and older adults ( $\geq$  50 years of age).

**Results** Of 793 175 patients with AIS admitted to 1471 hospitals, 9.1% (71 860) were young adults. Compared to older adults, a higher proportion of young adults received IV tPA among patients without contraindications (7.2% vs. 6.1%, adjusted odds ratio [aOR] 1.13, 95% confidence interval [CI] 1.10-1.17) and among patients without contraindications and with onset-to-door time  $\leq$ 3.5h (23.6 % vs. 19.3%, aOR 1.20, 95% CI 1.15-1.24). We did not observe differences in onset-to-needle time (median hours 2.7h) or door-to-needle time (DNT) (median minutes 60m) between young and older adults. The proportion of DNT $\leq$ 30 minutes, DNT $\leq$ 45 minutes, and DNT $\leq$ 60 minutes in young and older IV tPA treated patients were 16.9% vs 18.8%, 30.2% vs 32.8% and 50.2% vs 54.2%, respectively. Compared to older adults, young adults treated with IV tPA had lower odds of in-hospital mortality (0.5% vs 1.3%,

1  
2  
3  
4 aOR 0.54, 95% CI 0.35-0.82) and higher odds of independent ambulation at discharge  
5  
6  
7 (61.0% vs 53.6%, aOR 1.15, 95% CI 1.08-1.22), and the associations may be partly  
8  
9 explained by stroke severity measured by NIHSS score.  
10  
11

12 **Conclusion** Young adults with AIS were more likely to receive IV tPA than older  
13  
14 adults, though there was no difference between the two groups in time to treatment.  
15  
16 Compared with older adults, young adults may had better in-hospital outcomes.  
17  
18  
19  
20  
21  
22  
23

24 **Key words:** ischemic stroke, young stroke, thrombolysis, door-to-needle time  
25  
26  
27  
28  
29  
30  
31  
32  
33  
34  
35  
36  
37  
38  
39  
40  
41  
42  
43  
44  
45  
46  
47  
48  
49  
50  
51  
52  
53  
54  
55  
56  
57  
58  
59  
60

## Strengths and limitations of this study

- We used data from a large-scale, nationwide, hospital-based, multicenter quality improvement initiative.
- Multiple regression models adjusted for different levels of covariates were used to check the robustness of the results ;
- Data on intra-arterial therapies, puncture times, door-to-imaging, and follow-up outcomes after discharge were not collected and reported.



## ABBREVIATIONS

CSA: Chinese Stroke Association

CSCA: Chinese Stroke Center Alliance

QI: quality improvement

AIS: acute ischemic stroke

BMI: body mass index

mRS: modified Rankin Scale score

aOR: adjusted odds ratios

CI: confidence intervals

IV tPA: intravenous tissue plasminogen activator

IQR: interquartile range

NIHSS: National Institutes of Health Stroke Scale

DNT: door-to-needle time

sICH: symptomatic intracranial hemorrhage

## INTRODUCTION

Stroke incidence among adults under 50 years of age has risen in recent years.<sup>1-5</sup> This creates a significant socioeconomic burden due to high healthcare costs and loss of labor productivity.<sup>5,6</sup> According to the 2019 Chinese Stroke Statistics, 81.9% of stroke patients had ischemic strokes,<sup>7</sup> of which young adults constituted 15–18%.<sup>8</sup> Given this trend, researchers must carefully consider the clinical features and best practices of treatment for strokes in young adults.<sup>8</sup>

Ischemic stroke is a common, preventable, and treatable disease that typically results from thrombotic or thromboembolic blockage of a cerebral artery.<sup>9</sup> Revascularization therapy plays a major role in the process of saving penumbral tissue from infarction.<sup>10</sup> Tissue plasminogen activator (tPA) is the main intravenous drug approved for the treatment of acute ischemic stroke.<sup>11</sup> Treatment of acute occlusive stroke with IV tPA is considered the most regular and important method when given within 4.5 hours of occlusion.<sup>12,13</sup> While epidemiological studies have been done in other countries regarding IV tPA treatment in young AIS patients, there is limited research on this topic in China.<sup>13-17</sup>

The purpose of this study was to compare the characteristics, IV tPA treatment rates, onset-to-needle time, door-to-needle time (DNT) and in-hospital outcomes of young (<50 years of age) and older ( $\geq 50$  years of age) AIS patients in the Chinese Stroke

1  
2  
3  
4 Center Alliance (CSCA). We hypothesized that young AIS patients would be treated  
5  
6 more frequently with IV tPA, have shorter treatment time and better in-hospital  
7  
8 outcomes compared to older adults.  
9  
10

## 11 12 13 14 15 **METHODS**

### 16 17 18 **Data source**

19  
20  
21  
22 CSCA is a national, hospital-based, multicentre, voluntary, multifaceted intervention  
23  
24 and continuous quality improvement initiative. The data coordinating center of CSCA  
25  
26 resides at the China National Clinical Research Center for Neurological Diseases  
27  
28 (NCRCND), Beijing Tiantan Hospital.<sup>18</sup> Trained personnel collected patient  
29  
30 demographics, medical history, medications, DNT, and in-hospital outcomes, then  
31  
32 entered this information into a database using a web-based Patient Management Tool  
33  
34 (Medicine Innovation Research Center, Beijing, China). The tool is characterized by  
35  
36 predefined logic features, range checks, and user alerts to identify a potentially invalid  
37  
38 format or value entries and to optimize data quality at the time of entry. Training in  
39  
40 the use of the tool was provided online and onsite for all users. However, data  
41  
42 collected by hospitals were not independently audited by external chart review. In  
43  
44 addition, The China National Clinical Research Center for Neurological Diseases  
45  
46 serves as the data analysis center and has an agreement to analyze the aggregate  
47  
48 deidentified data for care quality feedback and research purposes. We abstracted 838  
49  
50  
51  
52  
53  
54  
55  
56  
57  
58  
59  
60

1  
2  
3  
4 229 cases and identified 793 175 patients admitted with ischemic strokes from 2015 to  
5  
6  
7 2019.

## 10 **Study population**

13 In the first stage, our analyses included patients admitted with AIS within 7 days of  
14  
15 the onset of symptoms between August 1, 2015 and July 31, 2019 from 1473 hospitals.  
16  
17 (supplemental material table I )We excluded patients who had in-hospital strokes  
18  
19 (n=7941, 0.95%), were missing IV tPA information (n=17461, 2.08%), had imprecise  
20  
21 or undocumented arrival times (n=12), transferred in from an acute care hospital  
22  
23 (n=1777, 0.212%), or had contraindications to venous thrombolysis within the time  
24  
25 window (n=17863, 2.13%). This yielded a population of patients with ischemic  
26  
27 strokes with indications for thrombolysis (n=793175). To analyze DNT and  
28  
29 in-hospital outcomes of ischemic stroke, we excluded patients treated with IV tPA  
30  
31 more than 4.5 hours after stroke onset (n=1315, 0.17%) and patients who were not  
32  
33 treated with IV tPA (n=743719, 93.76%). This yielded a subset of the study  
34  
35 population that consisted of 48141 AIS patients from 1290 hospitals (Figure 1).  
36  
37  
38  
39  
40  
41  
42  
43  
44  
45  
46

## 47 **Outcomes**

48  
49  
50 The IV tPA treatment rate was assessed among two populations. First, IV tPA rate  
51  
52 among patients without contraindications to thrombolytic therapy was calculated as  
53  
54 the number of IV tPA cases divided by the total number of ischemic stroke cases  
55  
56 without any contraindications to thrombolytic therapy. Then IV tPA rate among  
57  
58  
59  
60

1  
2  
3  
4 patients without contraindication to thrombolytic therapy and with onset-to-door time  
5  
6  $\leq 3.5$ h was calculated as the number of IV tPA cases divided by the total number of  
7  
8 ischemic stroke cases without any contraindications to thrombolytic therapy and  
9  
10 arrived at a hospital within 3.5 hours after stroke onset. The contraindications were  
11  
12 defined according to guidelines for the early management of patients with acute  
13  
14 ischemic stroke from the Heart Association/American Stroke Association and Chinese  
15  
16 Society of Neurology. DNT was defined as the time between arrival at the emergency  
17  
18 department (ED) and time of intravenous (IV) thrombolysis, and is an important  
19  
20 metric in AIS treatment.<sup>19,20</sup> We analyzed DNT as a binary outcome three times with a  
21  
22 different cut-off point each time ( $\leq 30$ ,  $\leq 45$ , or  $\leq 60$  minutes, respectively).  
23  
24  
25  
26  
27  
28  
29  
30  
31  
32  
33

34 In-hospital outcomes included symptomatic intracranial hemorrhage (sICH),  
35  
36 in-hospital mortality, and independent ambulation at discharge. sICH was defined as  
37  
38 intracranial hemorrhage (ICH) within 36 hours of admission, documented by CT or  
39  
40 MRI, with the treating physician's notes indicating clinical deterioration attributable  
41  
42 to hemorrhage. Patients who were able to walk < 48 hours after hospital admission  
43  
44 were considered to have independent ambulation at discharge.  
45  
46  
47  
48  
49

## 50 **Statistical analysis**

51  
52 Continuous variables with normal distribution were expressed as mean and SD, and  
53  
54 those with skewed/non-normal distribution as medians and interquartile ranges (IQR).  
55  
56  
57  
58  
59  
60 Categorical variables were summarised as frequencies and percentages. Because of

1  
2  
3  
4 the large sample size, some statistically significant differences may not be clinically  
5  
6 meaningful. We used absolute standardized differences (ASD) or Hodges–Lehmann  
7  
8 estimator to compare differences in baseline characteristics between young and older  
9  
10 adults independent of sample size. An ASD larger than 10% was considered  
11  
12  
13  
14  
15 meaningful imbalance.<sup>21</sup>

16  
17 For outcomes such as IV tPA treatment and in-hospital outcomes, logistic regression  
18  
19 models were performed to determine adjusted odds ratios (aORs) and 95% confidence  
20  
21 intervals (CIs). Multivariable models with different level of adjustment were used to  
22  
23 check the robustness of the results. Covariates in multivariable models including  
24  
25 gender, insurance status, body mass index (BMI), medical history of prior stroke or  
26  
27 transient ischemic attack (TIA), coronary artery disease (CAD) or prior myocardial  
28  
29 infarction (MI), diabetes mellitus, hypertension, smoking status, atrial  
30  
31 fibrillation/flutter, glycated hemoglobin, diastolic blood pressure, systolic blood  
32  
33 pressure, medication history (hypoglycemic drugs, antihypertensive drugs, antiplatelet  
34  
35 drugs, and lipid lowering drugs), and hospital grade.

36  
37  
38  
39  
40  
41  
42  
43  
44  
45  
46  
47 There were few missing data for most variables, with the exceptions of the in-hospital  
48  
49 NIHSS score (missing 19.4%), DNT (6.3%), glycated hemoglobin (10.6%) and BMI  
50  
51 (1.6%). For continuous variables missing less than 15%, the median was used for  
52  
53 imputation. Since the NIHSS score is a widely used tool for assessing stroke  
54  
55 severity<sup>22</sup> and contributes important information to AIS prognosis,<sup>23</sup> sensitivity  
56  
57  
58  
59  
60

1  
2  
3  
4 analyses adjusting for the NIHSS score were conducted. In addition, results from  
5  
6 multiple imputation were also provided.  
7  
8  
9

10  
11 All statistical analyses were performed using SAS Version 9.4 (SAS Institute, Cary,  
12  
13 NC, USA) and the %ggBaseline SAS macro.<sup>24</sup> Two-sided p-values of <0.05 were  
14  
15 considered statistically significant.  
16  
17  
18

## 19 20 **Patient and public involvement**

21  
22 Patients or the public were not involved in the design, or conduct, or reporting, or  
23  
24 dissemination plans of our research.  
25  
26  
27

## 28 29 **RESULTS**

30  
31 Of 838 229 patients with AIS in the CSCA, 793 175 patients enrolled from 1471  
32  
33 hospitals were eligible for inclusion in this study. The median age was 67.0 years  
34  
35 (range: 58.0-75.0) and 62.7% were men. A total of 261 760 (33.0%) patients had  
36  
37 previous stroke/TIA, 69 810 (8.8%) had coronary artery disease or myocardial  
38  
39 infarction (CAD/prior MI), 170 638 (21.5%) had diabetes, 510 928 (64.4%) had  
40  
41 hypertension, 294 708 (37.2%) were smokers, and 40 231 (5.1%) had atrial  
42  
43 fibrillation/flutter.  
44  
45  
46  
47  
48  
49

## 50 51 **Clinical characteristics**

52  
53 A total of 71 860 (9.1%) patients were young adults (<50 years) and 721 315 (90.9%)  
54  
55 were older adults (≥50 years). The mean age among young adults was 43.8±5.3 years  
56  
57  
58  
59  
60

and 68.3±10.0 years among older adults. A larger proportion of the young adults were men (76.3% vs 61.3%) and did not have health insurance coverage (12.9% vs 5.7%), compared to older adults. Young adults had a lower prevalence of cardiovascular risk factors compared to older adults, including history of stroke or TIA (22.5% vs 34.0%), CAD/prior MI (4.0% vs 9.3%), diabetes mellitus (15.3% vs 22.1%), hypertension (53.9% vs 65.5%), and atrial fibrillation (1.2% vs 5.5%). Young adults had a lower rate of medication use than older adults, including hypoglycemic drugs (10.9% vs 17.4%), antihypertensive drugs (33.5% vs 48%), antiplatelet drugs (14.6% vs 21.5%), and lipid lowering drugs (11.4% vs 15.3%). However, diastolic blood pressure in young adults was significantly higher than that of older adults ( mean±SD 92.3±16.1 vs mean±SD 86.5±13.5), and young adults had a statistically higher mean BMI than older adults (mean±SD 24.9±4.8 vs mean±SD 23.9±4.2). The proportion of young adults who smoked was also higher than that of older adults (49.9% vs 35.9%) (Table 1).

**Table 1. Baseline characteristics of young and old ischemic stroke patients**

| Baseline characteristics       | Total<br>(N=793175 [100%]) | Young adults<br>(< 50 years)<br>(N=71860 [9.1%]) | Old adults<br>(≥50 years)<br>(N=721315 [90.9%]) | ASD (%) / H-L<br>Estimator* |
|--------------------------------|----------------------------|--------------------------------------------------|-------------------------------------------------|-----------------------------|
| <b>Patient characteristics</b> |                            |                                                  |                                                 |                             |
| Age, years                     | 66.1±12.0                  | 43.8±5.3                                         | 68.3±10.0                                       | 306.1                       |
| Male, n (%)                    | 496960 (62.7)              | 54850 (76.3)                                     | 442110 (61.3)                                   | 32.8                        |
| Insurance status, n (%)        |                            |                                                  |                                                 |                             |
| UEBMI                          | 225940 (28.5)              | 19160 (26.7)                                     | 206780 (28.7)                                   | 4.5                         |
| URBMI                          | 149839 (18.9)              | 12393 (17.2)                                     | 137446 (19.1)                                   | 4.9                         |
| NRCMS                          | 333979 (42.1)              | 27587 (38.4)                                     | 306392 (42.5)                                   | 8.4                         |
| Self-pa                        | 50727 (6.4)                | 9263 (12.9)                                      | 41464 (5.7)                                     | 25.0                        |



|    |                                               |                  |                  |                  |      |
|----|-----------------------------------------------|------------------|------------------|------------------|------|
| 1  |                                               |                  |                  |                  |      |
| 2  |                                               |                  |                  |                  |      |
| 3  | Other                                         | 32690 (4.1)      | 3457 (4.8)       | 29233 (4.1)      | 3.4  |
| 4  | Arrive mode, n (%)                            |                  |                  |                  |      |
| 5  |                                               |                  |                  |                  |      |
| 6  | Ambulance                                     | 89484 (11.3)     | 7170 (10.0)      | 82314 (11.4)     | 4.5  |
| 7  | Private car                                   | 372727 (47.0)    | 33340 (46.4)     | 339387 (47.1)    | 1.4  |
| 8  | Taxi                                          | 68801 (8.7)      | 6743 (9.4)       | 62058 (8.6)      | 2.8  |
| 9  | Bicycle or tricycle                           | 7237 (0.9)       | 577 (0.8)        | 6660 (0.9)       | 1.1  |
| 10 | Helicopter                                    | 338 (0.0)        | 27 (0.0)         | 311 (0.0)        |      |
| 11 | Mobile stroke unit                            | 246 (0.0)        | 24 (0.0)         | 222 (0.0)        |      |
| 12 | Other                                         | 254342 (32.1)    | 23979 (33.4)     | 230363 (31.9)    | 3.2  |
| 13 | Medical history, n (%)                        |                  |                  |                  |      |
| 14 |                                               |                  |                  |                  |      |
| 15 | Previous stroke/TIA                           | 261760 (33.0)    | 16197 (22.5)     | 245563 (34.0)    | 25.8 |
| 16 | CAD/prior MI                                  | 69810 (8.8)      | 2906 (4.0)       | 66904 (9.3)      | 21.4 |
| 17 | Diabetes                                      | 170638 (21.5)    | 10985 (15.3)     | 159653 (22.1)    | 17.5 |
| 18 | Peripheral vascular disease                   | 13512 (1.7)      | 718 (1.0)        | 12794 (1.8)      | 6.8  |
| 19 | Hypertension                                  | 510928 (64.4)    | 38722 (53.9)     | 472206 (65.5)    | 23.8 |
| 20 | Smoking <sup>†</sup>                          | 294708 (37.2)    | 35848 (49.9)     | 258860 (35.9)    | 28.6 |
| 21 | Atrial fibrillation/flutter                   | 40231 (5.1)      | 886 (1.2)        | 39345 (5.5)      | 24.1 |
| 22 | Dyslipidemia                                  | 60605 (7.6)      | 5861 (8.2)       | 54744 (7.6)      | 2.2  |
| 23 | Carotid stenosis                              | 10161 (1.3)      | 509 (0.7)        | 9652 (1.3)       | 6.0  |
| 24 | Medication history, n (%)                     |                  |                  |                  |      |
| 25 |                                               |                  |                  |                  |      |
| 26 | Anticoagulants                                | 31326 (3.9)      | 2394 (3.3)       | 28932 (4.0)      | 3.7  |
| 27 | Hypoglycemic drugs                            | 133244 (16.8)    | 7802 (10.9)      | 125442 (17.4)    | 18.7 |
| 28 | Antihypertensive drugs                        | 370017 (46.7)    | 24065 (33.5)     | 345952 (48.0)    | 29.8 |
| 29 | Antiplatelet drugs                            | 165771 (20.9)    | 10482 (14.6)     | 155289 (21.5)    | 18.0 |
| 30 | Lipid lowering drugs                          | 118827 (15.0)    | 8171 (11.4)      | 110656 (15.3)    | 11.5 |
| 31 | NIHSS score in hospital <sup>‡</sup>          |                  |                  |                  |      |
| 32 |                                               |                  |                  |                  |      |
| 33 | Mean±SD                                       | 4.8±5.2          | 4.0±4.5          | 4.9±5.3          | 18.3 |
| 34 | Biochemical Indicators                        |                  |                  |                  |      |
| 35 |                                               |                  |                  |                  |      |
| 36 | Glycated hemoglobin <sup>§</sup> , %          |                  |                  |                  |      |
| 37 | Median (IQR)                                  | 5.8 (5.3–6.5)    | 5.7 (5.2–6.1)    | 5.8 (5.3–6.5)    | 11.4 |
| 38 | BMI <sup>  </sup>                             |                  |                  |                  |      |
| 39 | Mean±SD                                       | 24.0±4.3         | 24.9±4.8         | 23.9±4.2         | 22.2 |
| 40 | Homocysteine <sup>#</sup> , µmol/L            |                  |                  |                  |      |
| 41 | Median (IQR)                                  | 13.9 (10.4–19.1) | 13.4 (10.0–19.0) | 13.9 (10.5–19.1) | 2.1  |
| 42 | Systolic blood pressure <sup>* *</sup> , mmHg |                  |                  |                  |      |
| 43 | Mean±SD                                       | 150.0±23.0       | 147.9±24.4       | 150.2±22.8       | 9.7  |
| 44 | Diastolic blood pressure <sup>††</sup> , mmHg |                  |                  |                  |      |
| 45 | Mean±SD                                       | 87.0±13.9        | 92.3±16.1        | 86.5±13.5        | 39.0 |
| 46 | Hospital characteristics, n (%)               |                  |                  |                  |      |
| 47 |                                               |                  |                  |                  |      |
| 48 | Hospital level                                |                  |                  |                  |      |
| 49 |                                               |                  |                  |                  |      |
| 50 |                                               |                  |                  |                  |      |
| 51 |                                               |                  |                  |                  |      |
| 52 |                                               |                  |                  |                  |      |
| 53 |                                               |                  |                  |                  |      |
| 54 |                                               |                  |                  |                  |      |
| 55 |                                               |                  |                  |                  |      |
| 56 |                                               |                  |                  |                  |      |
| 57 |                                               |                  |                  |                  |      |
| 58 |                                               |                  |                  |                  |      |
| 59 |                                               |                  |                  |                  |      |
| 60 |                                               |                  |                  |                  |      |

|                    |               |              |               |      |
|--------------------|---------------|--------------|---------------|------|
| Secondary hospital | 303790 (38.3) | 23993 (33.4) | 279797 (38.8) | 11.3 |
| Tertiary hospital  | 489385 (61.7) | 47867 (66.6) | 441518 (61.2) | 11.3 |
| Hospital region    |               |              |               |      |
| Eastern China      | 365579 (46.1) | 32744 (45.6) | 332835 (46.1) | 1.0  |
| Central China      | 262618 (33.1) | 24477 (34.1) | 238141 (33.0) | 2.3  |
| Western China      | 164978 (20.8) | 14639 (20.4) | 150339 (20.8) | 1.0  |

Abbreviations: UEBMI, urban employee basic medical insurance; URBMI, urban resident basic medical insurance; NRCMS, new rural cooperative medical scheme; TIA, transient ischemic attack; CAD, coronary artery disease; MI, myocardial infarction; SD: standard deviation; IQR, interquartile range; NIHSS, National Institutes of Health Stroke Scale; ASD, absolute standardized difference.

\*HL estimator, Hodges–Lehmann estimator; an absolute standardized difference (%) >10% indicates meaningful imbalance between 2 groups.

†Smoking: having smoking experience or behaviors.

‡Information was missing for N=154052 patients (19.4%).

§Information was missing for N=84393 patients (10.6%); median was used for imputation.

|| Information was missing for N=12698 patients (1.6%); median was used for imputation.

#Information was missing for N= 35781 patients (4.5%).

\*\* Information was missing for N=245 patients (≈0.0%); median was used for imputation.

††Information was missing for N=251 patients (≈0.0%); median was used for imputation.

## IV tPA treatment rates

Young adults were treated more frequently with IV tPA than older adults among patients without contraindications to thrombolysis (7.2% vs 6.1%, aOR 1.13, 95% CI 1.10-1.17) and among patients without contraindication and with onset-to-door time ≤ 3.5h (23.6 % vs. 19.3%, aOR 1.20, 95% CI 1.15-1.24). Data from sensitivity analyses showed consistent results.(Table 2)

**Table 2. Multivariable analysis of IV tPA treatment by age group**

| Treatment                                       | Rate of IV-tPA     | aOR (95% CI)<br>from model 1 | aOR (95% CI)<br>from model 2 | aOR (95% CI)<br>from model 3 | aOR (95% CI)<br>from model 4 |
|-------------------------------------------------|--------------------|------------------------------|------------------------------|------------------------------|------------------------------|
| IV tPA among patients without contraindications | 49456/793175 (6.2) |                              |                              |                              |                              |
| Young adults                                    | 5181/71860 (7.2)   | 1.19 (1.15-1.22)             | 1.13 (1.10-1.17)             | 1.20 (1.16-1.24)             | 1.19(1.15-1.22)              |
| Old adults                                      | 44275/721315 (6.1) | 1.00                         | 1.00                         | 1.00                         | 1.00                         |
| IV tPA among patients                           | 45842/232905(19.7) |                              |                              |                              |                              |

without contraindication  
and with onset-to-door  
time  $\leq 3.5$ h

|              |                     |                  |                  |                  |                 |
|--------------|---------------------|------------------|------------------|------------------|-----------------|
| Young adults | 4768/20191 (23.6)   | 1.29 (1.25-1.34) | 1.20 (1.15-1.24) | 1.24 (1.20-1.29) | 1.23(1.19-1.28) |
| Old adults   | 41074/212714 (19.3) | 1.00             | 1.00             | 1.00             | 1.00            |

Abbreviations: CI, confidence interval; IV tPA, intravenous recombinant tissue plasminogen activator; OR, odds ratio.

Model 1: Logistic regression model without adjustment.

Model 2: adjusted for gender, insurance, BMI, previous stroke/TIA, previous CAD/prior MI, diabetes, hypertension, have smoking experience or behavior, atrial fibrillation/flutter, glyated, hemoglobin, diastolic blood pressure, hypoglycemic drugs, antihypertensive drugs, antiplatelet drugs, lipid-lowering drugs, and hospital level.

Model 3: adjusted for were in-hospital NIHSS score, gender, insurance, BMI, previous stroke/TIA, previous CAD/prior MI, diabetes, hypertension, have smoking experience or behavior, atrial fibrillation/flutter, glyated hemoglobin, diastolic blood pressure, hypoglycemic drugs, antihypertensive drugs, antiplatelet drugs, lipid-lowering drugs, and hospital level. Patients (N= 154052) with missing values on NIHSS score were not included in this analysis.

model 4: results from multiple imputation.

## Treatment time

While young adults were more likely to receive IV tPA, there was no significant difference in onset-to-needle time (median 2.7 hours, IQR 2.0–3.5 for both groups) and DNT (median 60.0 minutes, IQR 42.0-90.0 vs median 60.0 minutes, IQR 36.0-84.0) among young and older adults. DNT was also analyzed as a binary outcome at three levels: DNT  $\leq 30$ , DNT  $\leq 45$ , and DNT  $\leq 60$  minutes. There were no significant differences between the two groups on any DNT level (16.9% vs 18.8%; 30.2% vs 32.8%; 50.2% vs 54.2%) (Table 3).

**Table 3. Treatment time in young and old ischemic stroke patients treated with IV tPA**

| Measures                             | Total<br>(N=48141 [100%]) | Young adults<br>( $< 50$ years)<br>(N=5044 [10.5%]) | Old adults<br>( $\geq 50$ years)<br>(N=43097 [89.5%]) | ASD<br>(%)/H-L<br>Estimator<br>* |
|--------------------------------------|---------------------------|-----------------------------------------------------|-------------------------------------------------------|----------------------------------|
| Onset-to-needle time <sup>†</sup> ,h |                           |                                                     |                                                       |                                  |
| Median (IQR)                         | 2.7 (2.0–3.5)             | 2.7 (2.0–3.5)                                       | 2.7 (2.0–3.5)                                         |                                  |
| DNT <sup>‡</sup> ,min                |                           |                                                     |                                                       |                                  |
| Median (IQR)                         | 60.0 (36.0–84.0)          | 60.0 (42.0–90.0)                                    | 60.0 (36.0–84.0)                                      | 9.7                              |
| Treatment time                       |                           |                                                     |                                                       |                                  |
| DNT $\leq 30$ minutes                | 8938 (18.6)               | 850 (16.9)                                          | 8088 (18.8)                                           | 5.0                              |
| DNT $\leq 45$ minutes                | 15637 (32.5)              | 1521 (30.2)                                         | 14116 (32.8)                                          | 5.6                              |
| DNT $\leq 60$ minutes                | 25884 (53.8)              | 2531 (50.2)                                         | 23353 (54.2)                                          | 8.0                              |

Abbreviations: CI=confidence interval; IV tPA, intravenous recombinant tissue plasminogen activator; DNT, door-to-needle time; ASD, absolute standardized difference.

\*HL estimator, Hodges–Lehmann estimator; an absolute standardized difference (%)  $>10\%$  indicates meaningful imbalance between 2 groups.

<sup>†</sup>Onset-to-needle time was missing for 3818 (7.9%) patients, with 431(8.5%) in age  $<50$  and 3387(7.9%) in  $\geq 50$  groups.

<sup>‡</sup>DNT was missing for 3027(6.3%) patients, with 342 (6.8%) in age  $<50$  and 2685(6.2%) in  $\geq 50$  groups.

## In-hospital outcomes

In-hospital outcomes including sICH, in-hospital mortality, and independent ambulation at discharge were summarized in Table 4. Multiple logistic regression with adjustments of unbalanced covariates (ASD%  $>10\%$  in Supplemental Table II) showed that young adults had non-significantly lower rates of sICH (0.5% vs 0.9%, aOR=0.74, 95% CI 0.49-1.11) than older adults. However, young adults had significantly lower rates of in-hospital mortality (0.5% vs 1.3%, aOR=0.54, 95% CI 0.35-0.82) and were more likely to be independently ambulating at discharge (61.0% vs 53.6%, aOR=1.15, 95% CI 1.08-1.22).

1  
2  
3  
4 In sensitivity analyses adjusted for NIHSS scores, young adults had non-significantly  
5  
6 lower odds of sICH (aOR=0.77, 95%CI 0.5-1.18), in-hospital mortality (aOR=0.70,  
7  
8 95%CI 0.46-1.09), and a neutral association with independent ambulation at discharge  
9  
10 (aOR=1.00, 95% CI 0.93-1.08). Sensitivity analysis using different age cut-off point  
11  
12 (<35 years and  $\geq$  35 years) showed consistent results with primary analysis  
13  
14 (supplemental material table III). But when we used another age cut of point (<45  
15  
16 years and  $\geq$ 45 years ), we had a lower sICH rate (aOR=0.44, 95% CI 0.19-0.99) in  
17  
18 the young group (supplemental material table IV).  
19  
20  
21  
22  
23  
24  
25  
26  
27  
28  
29  
30  
31  
32  
33  
34  
35  
36  
37  
38  
39  
40  
41  
42  
43  
44  
45  
46  
47  
48  
49  
50  
51  
52  
53  
54  
55  
56  
57  
58  
59  
60

**Table 4. In-hospital outcomes in young and old ischemic stroke patients treated with IV tPA**

| Outcome                             | Rate of outcomes   | aOR (95% CI) from model 1 | aOR (95% CI) from model 2 | aOR (95% CI) from model 3 | aOR (95% CI) from model 4 |
|-------------------------------------|--------------------|---------------------------|---------------------------|---------------------------|---------------------------|
| sICH                                | 414/48141 (0.9)    |                           |                           |                           |                           |
| Young adults                        | 26/5044(0.5)       | 0.57 (0.38-0.85)          | 0.74 (0.49-1.11)          | 0.77 (0.5-1.18)           | 0.79(0.52-1.20)           |
| Old adults                          | 388/43097(0.9)     | 1.00                      | 1.00                      | 1.00                      | 1.00                      |
| In-hospital mortality               | 579/48141 (1.2)    |                           |                           |                           |                           |
| Young adults                        | 24/5044(0.5)       | 0.37 (0.24-0.55)          | 0.54 (0.35-0.82)          | 0.70 (0.46-1.09)          | 0.65(0.43-1.00)           |
| Old adults                          | 555/43097(1.3)     | 1.00                      | 1.00                      | 1.00                      | 1.00                      |
| Independent ambulation at discharge | 26175/48141 (54.4) |                           |                           |                           |                           |
| Young adults                        | 3079/5044(61.0)    | 1.36 (1.28-1.44)          | 1.15 (1.08-1.22)          | 1.00 (0.93-1.08)          | 1.02(0.96-1.10)           |
| Old adults                          | 23096/43097(53.6)  | 1.00                      | 1.00                      | 1.00                      | 1.00                      |

Abbreviations: CI, confidence interval; IV tPA, intravenous recombinant tissue plasminogen activator; OR, odds ratio.

Model 1: Logistic regression model without adjustment.

Model 2: Adjusted for gender, insurance, BMI, previous stroke/TIA, previous CAD/prior MI, diabetes, hypertension, have smoking experience or behavior, atrial fibrillation/flutter, glycated hemoglobin, diastolic blood pressure, systolic blood pressure, hypoglycemic drugs, antihypertensive drugs, antiplatelet drugs, and lipid-lowering drugs.

Model 3: Adjusted for in-hospital NIHSS score, gender, insurance, BMI, previous stroke/TIA, previous CAD/prior MI, diabetes, hypertension, have smoking experience or behavior, atrial fibrillation/flutter, glycated hemoglobin, diastolic blood pressure, blood pressure, hypoglycemic drugs, antihypertensive drugs, antiplatelet drugs, and lipid-lowering drugs. Patients (N= 2503) with missing values on NIHSS score were not included in this analysis.

model 4: results from multiple imputation.

## DISCUSSION

In this hospital-based observational study of 793 175 AIS patients, we found that young adults (<50 years of age) were more likely to be treated with IV tPA than older adults (7.2% vs 6.1%), which was consistent with our hypothesis. Our study demonstrated that young stroke patients had fewer comorbidities (previous stroke/TIA, previous CAD/prior MI, diabetes, hypertension, and atrial fibrillation/flutter) at baseline, which may compel providers to feel more secure in administering IV tPA to this group of patients. Even though we did not observe a difference in DNT between age groups, we found that young adults had more favorable in-hospital outcomes than older adults, including lower odds of sICH, in-hospital mortality and higher odds of independent ambulation at discharge. However, after adjusting for NIHSS scores, the differences were not significant. Therefore, the benefit among young adults may be explained by stroke severity measured by NIHSS score.

We chose 50 as the cut-off age because several important international studies on thrombolytic therapy in young people also set the cut-off age at 50.<sup>15,16</sup> Using the same cut-off age value would benefit the comparison with other studies and also have advantages for potential systematic review and meta-analysis.

IV tPA thrombolytic therapy is considered to be the standard therapy in patients with acute ischemic stroke. However, its use has been studied primarily in adults over age

1  
2  
3  
4 50.<sup>16</sup> Given increasing evidence in the literature that thrombolytic therapy rarely  
5  
6 causes hemorrhages in patients with stroke-mimicking conditions, providers may also  
7  
8 feel more comfortable administering IV tPA to young adults when it is uncertain  
9  
10 whether a stroke or a stroke mimic had occurred.<sup>25</sup> Our research also supports this  
11  
12 conclusion. Young adults had similar time to treatment and were more likely to be  
13  
14 treated than older adults, which may reflect increased awareness among patients and  
15  
16 clinicians that stroke is a potentially fatal disease affecting people of all ages.  
17  
18  
19  
20  
21  
22  
23  
24  
25

26 The relationship between time to treatment and mortality was first recognized in  
27  
28 clinical studies.<sup>26,27</sup> The importance of this metric was reemphasized in the 2004  
29  
30 American College of Cardiology/American Heart Association practice guidelines,  
31  
32 which stated that DNT targets “should not be perceived as an average performance  
33  
34 standard but as a goal that an early treatment system in every hospital should seek for  
35  
36 every appropriate patient”.<sup>28</sup> Consistent with a prior analysis of SITS-ISTR showing  
37  
38 no difference in median door-to-needle times between patients 18 to 50 and >50 years  
39  
40 of age, there was also not an obvious differentiation in treatment among young or  
41  
42 older adults in our study.<sup>15</sup> However, a prior study by Dodds and colleagues found  
43  
44 that young adults (18-40 years) with AIS were more likely to experience a delay in  
45  
46 evaluation and treatment.<sup>13</sup> Our definition of young adults (age <50 years) differs  
47  
48 from theirs (age 18–40 years) and is more applicable in China, which may also  
49  
50 explain why we did not find differences in treatment times between the two groups.<sup>29</sup>  
51  
52  
53  
54  
55  
56  
57  
58  
59  
60



1  
2  
3  
4 Another explanation for the lack of differences in treatment times between the two  
5  
6 groups may be that DNT mainly depends on hospital level and treatment process  
7  
8 rather than age.  
9  
10

11  
12  
13  
14  
15 In our study, we observed a higher rate of sICH and in-hospital mortality among older  
16  
17 adults treated with IV tPA, though the difference was not significant adjusted for  
18  
19 NIHSS scores. We cannot entirely separate young age from lower NIHSS score, as  
20  
21 young patients are highly correlated with lower NIHSS scores in clinical practise  
22  
23 (4.0±4.5 vs. 4.9±5.3, the Rank Biserial correlation coefficient in this study is 0.10,  
24  
25 p<0.001). Therefore, the associations may be partly explained by stroke severity  
26  
27 measured by NIHSS score. Although we do not find significant differences between  
28  
29 these two groups, we do see a trend towards better outcomes in young people. One  
30  
31 possible explanation is that younger stroke patients have fewer comorbidities in their  
32  
33 medical history, such as previous stroke or TIA, CAD/MI, diabetes mellitus,  
34  
35 hypertension, and atrial fibrillation, as well as milder strokes, all of which are  
36  
37 associated with better outcomes.<sup>30</sup> Other factors favoring recovery in young stroke  
38  
39 patients include greater brain plasticity and more robust family and social support.<sup>31</sup>  
40  
41  
42  
43  
44  
45  
46  
47  
48  
49  
50

51  
52  
53 There are several limitations in our study. Since hospital participation in the CSCA is  
54  
55 voluntary, participating hospitals are more likely to be larger, tertiary centers with a  
56  
57 myriad of resources that smaller hospitals do not have access to. We recognize that  
58  
59  
60

1  
2  
3  
4 findings from CSCA may not be generalizable to AIS patients admitted to hospitals  
5  
6 outside of the CSCA. Second, we did not report data on intra-arterial (IA) therapies  
7  
8 and puncture times because only a very small number of patients in our study received  
9  
10 thrombectomy. We also did not have door-to-imaging data to support the study and  
11  
12 there was a relatively high proportion of missing DNT values (6.3% overall, 6.8% in  
13  
14 young and 6.2% in older patients). However, we did not observe a significant  
15  
16 difference in DNTs between young and older AIS patients. Lastly, although we  
17  
18 provided some possible explanation for the differences between young and old adults  
19  
20 group, further researches are needed to explore the detailed mechanism.  
21  
22  
23  
24  
25  
26  
27  
28  
29  
30

## 31 **CONCLUSION**

32  
33  
34  
35 In summary, young adults with AIS are more likely to receive IV tPA than older  
36  
37 adults, but there is no difference between the two groups in time to treatment. Young  
38  
39 adults may have better in-hospital outcomes compared with older adults, suggesting  
40  
41 favorable effects of treatment with IV tPA.  
42  
43  
44  
45  
46  
47  
48

## 49 **ACKNOWLEDGEMENTS**

50  
51  
52 We thank the staff and participants of the CSCA (Chinese Stroke Center Alliance)  
53  
54 studies for their contribution.  
55  
56  
57  
58  
59  
60

## CONTRIBUTORS

Conceived and led the project: XZ, YW, ZL, YW and YJ. Conception and design:

HW, HG, YW and YJ. Data collection and analysis: HW, XY, CW, HG and QZ.

Interpret the data: LL, XM and HL. Drafting the article and revising the content: HW,

HG, CL, JY and ZL. All authors approved the final version of the manuscript.

## FUNDING

The Chinese Stroke Center Alliance program was supported by grants from the

Ministry of Science and Technology and the Ministry of Health of the People's

Republic of China (National Key R&D Program of China, Code: 2016YFC0901001,

2017YFC1310901, 2016YFC0901002, 2017YFC1307905, 2015BAI12B00), Beijing

Talents Project (2018A13, 2018000021223ZK03), CAMS Innovation Fund for

Medical Sciences (2019-I2M-5-029), Beijing Municipal Committee of Science and

Technology (Z201100005620010), Beijing Natural Science Foundation (Z200016).

## COMPETING INTERESTS

None declared.

## PATIENT CONSENT FOR PUBLICATION

Not required.

## ETHICS APPROVAL

This study received approval from the Institutional Review Board/Ethics Committee of Beijing Tiantan Hospital, Capital Medical University with approval number KY 2018-061-02. Participating hospitals received research approval to collect data in CSCA without requiring individual patient informed consent under the common rule or a waiver of authorisation and exemption from their Institutional Review Board.

## DATA AVAILABILITY STATEMENT

Data are available upon reasonable request. The data that support the findings of this study are available from the corresponding author upon reasonable request and after clearance by the local ethics committee.

## REFERENCES

1. Béjot Y, Bailly H, Durier J, et al. Epidemiology of stroke in Europe and trends for the 21st century. *Presse Med* 2016;45:e391-8. doi: 10.1016/j.lpm.2016.10.003 [published Online First: 2016/11/07]
2. Hathidara MY, Saini V, Malik AM. Stroke in the young: A global update. *Current neurology and neuroscience reports* 2019;19:91. doi: 10.1007/s11910-019-1004-1 [published Online First: 2019/11/27]
3. Rutten-Jacobs LC, Maaijwee NA, Arntz RM, et al. Risk factors and prognosis of

1  
2  
3  
4 young stroke. The FUTURE study: a prospective cohort study. Study rationale and  
5  
6 protocol. *BMC Neurol* 2011;11:109. doi: 10.1186/1471-2377-11-109 [published  
7  
8 Online First: 2011/09/22]  
9

10  
11  
12 4. George MG. Risk Factors for Ischemic Stroke in Younger Adults: A Focused  
13  
14 Update. *Stroke* 2020;51:729-35. doi: 10.1161/strokeaha.119.024156 [published  
15  
16 Online First: 2020/02/23]  
17

18  
19  
20 5. Maaijwee NA, Rutten-Jacobs LC, Schaapsmeeders P, et al. Ischaemic stroke in  
21  
22 young adults: risk factors and long-term consequences. *Nat Rev Neurol*  
23  
24 2014;10:315-25. doi: 10.1038/nrneurol.2014.72 [published Online First: 2014/04/30]  
25  
26

27  
28 6. Feigin VL, Roth GA, Naghavi M, et al. Global burden of stroke and risk factors in  
29  
30 188 countries, during 1990–2013: a systematic analysis for the Global Burden of  
31  
32 Disease Study 2013. *The Lancet Neurology* 2016;15:913-24. doi:  
33  
34 10.1016/s1474-4422(16)30073-4  
35  
36

37  
38  
39 7. Wang Y-J, Li Z-X, Gu H-Q, et al. China Stroke Statistics 2019: A Report From the  
40  
41 National Center for Healthcare Quality Management in Neurological Diseases, China  
42  
43 National Clinical Research Center for Neurological Diseases, the Chinese Stroke  
44  
45 Association, National Center for Chronic and Non-communicable Disease Control  
46  
47 and Prevention, Chinese Center for Disease Control and Prevention and Institute for  
48  
49 Global Neuroscience and Stroke Collaborations. *Stroke and Vascular Neurology*  
50  
51 2020;5:211-39. doi: 10.1136/svn-2020-000457  
52  
53  
54  
55

56  
57  
58 8. Singhal AB, Biller J, Elkind MS, et al. Recognition and management of stroke in  
59  
60

- 1  
2  
3  
4 young adults and adolescents. *Neurology* 2013;81:1089-97. doi:  
5  
6 10.1212/WNL.0b013e3182a4a451 [published Online First: 2013/08/16]  
7  
8  
9 9. Peña-Martínez C, Durán-Laforet V, García-Culebras A, et al. Pharmacological  
10  
11 Modulation of Neutrophil Extracellular Traps Reverses Thrombotic Stroke tPA  
12  
13 (Tissue-Type Plasminogen Activator) Resistance. *Stroke* 2019;50:3228-37. doi:  
14  
15 10.1161/strokeaha.119.026848 [published Online First: 2019/09/19]  
16  
17  
18 10. Martínez-Sánchez P, Díez-Tejedor E, Fuentes B, et al. Systemic Reperfusion  
19  
20  
21  
22  
23  
24  
25  
26  
27  
28  
29  
30  
31  
32  
33  
34  
35  
36  
37  
38  
39  
40  
41  
42  
43  
44  
45  
46  
47  
48  
49  
50  
51  
52  
53  
54  
55  
56  
57  
58  
59  
60
10. Martínez-Sánchez P, Díez-Tejedor E, Fuentes B, et al. Systemic Reperfusion Therapy in Acute Ischemic Stroke. *Cerebrovascular Diseases* 2007;24:143-52. doi: 10.1159/000107390
11. Powers WJ, Rabinstein AA, Ackerson T, et al. Guidelines for the Early Management of Patients With Acute Ischemic Stroke: 2019 Update to the 2018 Guidelines for the Early Management of Acute Ischemic Stroke: A Guideline for Healthcare Professionals From the American Heart Association/American Stroke Association. *Stroke* 2019;50:e344-e418. doi:10.1161/STR.0000000000000211
12. Berge E, Whiteley W, Audebert H, et al. European Stroke Organisation (ESO) guidelines on intravenous thrombolysis for acute ischaemic stroke. *Eur Stroke J* 2021;6:I-LXII. doi: 10.1177/2396987321989865
13. Dodds JA, Xian Y, Sheng S, et al. Thrombolysis in young adults with stroke: Findings from Get With The Guidelines-Stroke. *Neurology* 2019;92:e2784-92. doi: 10.1212/wnl.00000000000007653 [published Online First: 2019/05/17]
14. Papavasileiou V, Goldstein LB. Thrombolysis in young adults with acute ischemic

1  
2  
3  
4 stroke. *Neurology* 2019;92:1129-30. doi: 10.1212/wnl.00000000000007651  
5

6  
7 15. Toni D, Ahmed N, Anzini A, et al. Intravenous thrombolysis in young stroke  
8  
9 patients: results from the SITS-ISTR. *Neurology* 2012;78:880-7. doi:  
10  
11 10.1212/WNL.0b013e31824d966b [published Online First: 2012/03/10]  
12  
13

14  
15 16. Poppe AY, Buchan AM, Hill MD. Intravenous thrombolysis for acute ischaemic  
16  
17 stroke in young adult patients. *Can J Neurol Sci* 2009;36:161-7. doi:  
18  
19 10.1017/s031716710012027x [published Online First: 2009/04/22]  
20  
21  
22

23  
24 17. Shi J, Cao Y, You S, et al. Young Stroke Patients Treated with Intravenous  
25  
26 Thrombolysis have a More Favorable Outcome and Mortality Compared with Older  
27  
28 Patients. *Curr Neurovasc Res* 2017;14:141-48. doi:  
29  
30 10.2174/1567202614666170328095431 [published Online First: 2017/03/31]  
31  
32  
33

34  
35 18. Wang Y, Li Z, Wang Y, et al. Chinese Stroke Center Alliance: a national effort to  
36  
37 improve healthcare quality for acute stroke and transient ischaemic attack: rationale,  
38  
39 design and preliminary findings. *Stroke Vasc Neurol* 2018;3:256-62. doi:  
40  
41 10.1136/svn-2018-000154 [published Online First: 2019/01/15]  
42  
43  
44

45  
46 19. Hsieh CY, Chen WF, Chen CH, et al. Efforts to reduce the door-to-needle time of  
47  
48 thrombolysis in acute ischemic stroke: video-assisted therapeutic risk communication.  
49  
50 *J Formos Med Assoc* 2014;113:929-33. doi: 10.1016/j.jfma.2013.11.012 [published  
51  
52 Online First: 2014/01/15]  
53  
54

55  
56 20. van Tuijn CF, Luitse JS, van der Valk M, et al. Reduction of the door-to-needle  
57  
58 time for administration of antibiotics in patients with a severe infection: a tailored  
59  
60

1  
2  
3  
4 intervention project. *Neth J Med* 2010;68:123-7.  
5

6  
7 21. Austin PC. Balance diagnostics for comparing the distribution of baseline  
8  
9 covariates between treatment groups in propensity-score matched samples. *Stat Med*  
10  
11 2009;28:3083-107. doi: 10.1002/sim.3697 [published Online First: 2009/09/17]  
12  
13

14  
15 22. Habib M, Karim ASMR, Hossain MM, et al. Assessment of Initial Stroke Severity  
16  
17 by National Institute Health Stroke Scale (NIHSS) Score at Admission. *Journal of*  
18  
19 *Dhaka Medical College* 2018;26:90-93. doi: 10.3329/jdmc.v26i2.38765  
20  
21

22  
23 23. Chen X, Zhan X, Chen M, et al. The prognostic value of combined NT-pro-BNP  
24  
25 levels and NIHSS scores in patients with acute ischemic stroke. *Intern Med*  
26  
27 2012;51:2887-92. doi: 10.2169/internalmedicine.51.8027 [published Online First:  
28  
29 2012/10/16]  
30  
31

32  
33 24. Gu HQ, Li DJ, Liu C, et al. %ggBaseline: a SAS macro for analyzing and  
34  
35 reporting baseline characteristics automatically in medical research. *Ann Transl Med*  
36  
37 2018;6:326. doi: 10.21037/atm.2018.08.13 [published Online First: 2018/10/27]  
38  
39

40  
41 25. Zinkstok SM, Engelter ST, Gensicke H, et al. Safety of thrombolysis in stroke  
42  
43 mimics: results from a multicenter cohort study. *Stroke* 2013;44:1080-4. doi:  
44  
45 10.1161/STROKEAHA.111.000126  
46  
47

48  
49 26. Cannon CP, Gibson CM, Lambrew CT, et al. Relationship of  
50  
51 symptom-onset-to-balloon time and door-to-balloon time with mortality in patients  
52  
53 undergoing angioplasty for acute myocardial infarction. *Jama* 2000;283:2941-7. doi:  
54  
55 10.1001/jama.283.22.2941 [published Online First: 2000/06/24]  
56  
57  
58  
59  
60



- 1  
2  
3  
4 27. Schull MJ, Vermeulen M, Donovan L, et al. Can the wrong statistic be bad for  
5  
6 health? Improving the reporting of door-to-needle time performance in acute  
7  
8 myocardial infarction. *Am Heart J* 2005;150:583-7. doi: 10.1016/j.ahj.2005.03.061  
9  
10 [published Online First: 2005/09/20]  
11  
12  
13  
14 28. Antman EM, Anbe DT, Armstrong PW, et al. ACC/AHA guidelines for the  
15  
16 management of patients with ST-elevation myocardial infarction--executive summary:  
17  
18 a report of the American College of Cardiology/American Heart Association Task  
19  
20 Force on Practice Guidelines (Writing Committee to Revise the 1999 Guidelines for  
21  
22 the Management of Patients With Acute Myocardial Infarction). *Circulation*  
23  
24 2004;110:588-636. doi: 10.1161/01.Cir.0000134791.68010.Fa [published Online First:  
25  
26 2004/08/04]  
27  
28  
29  
30  
31  
32  
33 29. Xiaobing Z SH, Li'an H. Clinical investigation of stroke in young and  
34  
35 middle-aged adults. *Cerebrovascular Diseases Foreign Medical Sciences*  
36  
37 2004;012:354-7.  
38  
39  
40  
41 30. Arnold M, Halpern M, Meier N, et al. Age-dependent differences in demographics,  
42  
43 risk factors, co-morbidity, etiology, management, and clinical outcome of acute  
44  
45 ischemic stroke. *Journal of Neurology* 2008;255:1503-07. doi:  
46  
47 10.1007/s00415-008-0949-9  
48  
49  
50  
51  
52 31. Popa-Wagner A, Carmichael ST, Kokaia Z, et al. The response of the aged brain  
53  
54 to stroke: too much, too soon? *Curr Neurovasc Res* 2007;4:216-27. doi:  
55  
56 10.2174/156720207781387213 [published Online First: 2007/08/19]  
57  
58  
59  
60

1  
2  
3  
4  
5 **Figure legend**  
6

7 Figure 1. Study flowchart for patients identification.

8 Abbreviations: IV tPA, intravenous tissue plasminogen activator.  
9  
10  
11  
12  
13  
14  
15  
16  
17  
18  
19  
20  
21  
22  
23  
24  
25  
26  
27  
28  
29  
30  
31  
32  
33  
34  
35  
36  
37  
38  
39  
40  
41  
42  
43  
44  
45  
46  
47  
48  
49  
50  
51  
52  
53  
54  
55  
56  
57  
58  
59  
60

For peer review only

**Source population**

Admission (N=838229)  
Hospital (N=1473)  
August 1, 2015 to July 31, 2019

Excluded (n=45054)

- In-hospital stroke (7941)
- Missing IV tPA information (17461)
- Missing arrival time (12)
- Transferred in from acute care hospital (1777)
- Contraindications to venous thrombolysis within a time window (17863)

**Analysis of outcomes in all ischemic stroke**

Admission (N=793175)  
Hospital (N=1471)

Excluding (n=745034)

- Treated with tPA but >4.5h (1315) Not
- treated with tPA (743719)

**Analysis of treatment times, and outcomes in patients treated with tPA within 4.5 hours**

Admission (N=48141)  
Hospital (N=1290)

## Supplemental Material

1

2 Table I . Distribution of hospitals in our study

3

| Hospital region | Province or Municipality | Number of hospitals (N=676) | Hospital region | Province or Municipality | Number of hospitals (N=401) | Hospital region | Province or Municipality | Number of hospitals (N=394) |
|-----------------|--------------------------|-----------------------------|-----------------|--------------------------|-----------------------------|-----------------|--------------------------|-----------------------------|
| Eastern China   | Beijing                  | 16                          | Central China   | Jilin                    | 32                          | Western China   | Inner Mongolia           | 23                          |
|                 | Tianjin                  | 13                          |                 | Heilongjiang             | 41                          |                 | Guangxi                  | 49                          |
|                 | Hebei                    | 143                         |                 | Shanxi                   | 44                          |                 | Chongqing                | 16                          |
|                 | Liaoning                 | 53                          |                 | Anhui                    | 29                          |                 | Sichuan                  | 125                         |
|                 | Shanghai                 | 16                          |                 | Jiangxi                  | 25                          |                 | Guizhou                  | 23                          |
|                 | Jiangsu                  | 93                          |                 | Henan                    | 157                         |                 | Yunnan                   | 52                          |
|                 | Zhejiang                 | 86                          |                 | Hubei                    | 39                          |                 | Tibet                    | 1                           |
|                 | Fujian                   | 52                          |                 | Hunan                    | 34                          |                 | Shaanxi                  | 41                          |
|                 | Shandong                 | 81                          |                 |                          |                             |                 | Gansu                    | 33                          |
|                 | Guangdong                | 113                         |                 |                          |                             |                 | Qinghai                  | 9                           |
|                 | Hainan                   | 10                          |                 |                          |                             |                 | Ningxia                  | 5                           |
|                 |                          |                             |                 |                          |                             |                 | Xinjiang                 | 17                          |

24

25

26

27

28

29

30

31

32

33

34

35

36

37

38

39

40

41

42

43

44

45

46

47

48

49

50

51

52

53

54

55

56

57

58

59

60

Table 2. Baseline characteristics of young and old ischemic stroke patients with IV tPA treatment

| Baseline characteristics             | Total<br>(N=48141 [100%]) | Young adults<br>(< 50 years)<br>(N=5044 [10.5%]) | Old adults (≥50 years)<br>(N=43097 [89.5%]) | ASD*  |
|--------------------------------------|---------------------------|--------------------------------------------------|---------------------------------------------|-------|
| Patient characteristics              |                           |                                                  |                                             |       |
| Age, years                           |                           |                                                  |                                             |       |
| Mean±SD                              | 65.2±12.1                 | 43.4±5.6                                         | 67.8±9.8                                    | 305.7 |
| Male, n (%)                          | 31456 (65.3)              | 3961 (78.5)                                      | 27495 (63.8)                                | 32.9  |
| Insurance status, n (%)              |                           |                                                  |                                             |       |
| UEBMI                                | 15948 (33.1)              | 1609 (31.9)                                      | 14339 (33.3)                                | 3.0   |
| URBMI                                | 9813 (20.4)               | 913 (18.1)                                       | 8900 (20.7)                                 | 6.6   |
| NRCMS                                | 16442 (34.2)              | 1495 (29.6)                                      | 14947 (34.7)                                | 10.9  |
| Self-pa                              | 4083 (8.5)                | 813 (16.1)                                       | 3270 (7.6)                                  | 26.5  |
| Other                                | 1855 (3.9)                | 214 (4.2)                                        | 1641 (3.8)                                  | 2.0   |
| Arrive mode, n (%)                   |                           |                                                  |                                             |       |
| Ambulance                            | 14364 (29.8)              | 1352 (26.8)                                      | 13012 (30.2)                                | 7.5   |
| Private car                          | 21213 (44.1)              | 2240 (44.4)                                      | 18973 (44.0)                                | 0.8   |
| Taxi                                 | 2539 (5.3)                | 357 (7.1)                                        | 2182 (5.1)                                  | 8.4   |
| Bicycle or tricycle                  | 118 (0.2)                 | 7 (0.1)                                          | 111 (0.3)                                   | 4.5   |
| Helicopter                           | 14 (0.0)                  | 1 (0.0)                                          | 13 (0.0)                                    |       |
| Mobile stroke unit                   | 31 (0.1)                  | 4 (0.1)                                          | 27 (0.1)                                    | 0.0   |
| Other                                | 9862 (20.5)               | 1083 (21.5)                                      | 8779 (20.4)                                 | 2.7   |
| Medical history, n (%)               |                           |                                                  |                                             |       |
| Previous stroke/TIA                  | 12339 (25.6)              | 830 (16.5)                                       | 11509 (26.7)                                | 25.0  |
| CAD/prior MI                         | 4737 (9.8)                | 240 (4.8)                                        | 4497 (10.4)                                 | 21.3  |
| Diabetes                             | 8477 (17.6)               | 516 (10.2)                                       | 7961 (18.5)                                 | 23.8  |
| Peripheral vascular disease          | 628 (1.3)                 | 31 (0.6)                                         | 597 (1.4)                                   | 8.0   |
| Hypertension                         | 28815 (59.9)              | 2283 (45.3)                                      | 26532 (61.6)                                | 33.1  |
| Smoking <sup>†</sup>                 | 18835 (39.1)              | 2567 (50.9)                                      | 16268 (37.7)                                | 26.8  |
| Atrial fibrillation/flutter          | 5692 (11.8)               | 138 (2.7)                                        | 5554 (12.9)                                 | 38.7  |
| Dyslipidemia                         | 3195 (6.6)                | 351 (7.0)                                        | 2844 (6.6)                                  | 1.6   |
| Carotid stenosis                     | 454 (0.9)                 | 22 (0.4)                                         | 432 (1.0)                                   | 7.2   |
| Medication history, n (%)            |                           |                                                  |                                             |       |
| Anticoagulants                       | 1779 (3.7)                | 150 (3.0)                                        | 1629 (3.8)                                  | 4.4   |
| Hypoglycemic drugs                   | 6404 (13.3)               | 330 (6.5)                                        | 6074 (14.1)                                 | 25.2  |
| Antihypertensive drugs               | 20099 (41.8)              | 1302 (25.8)                                      | 18797 (43.6)                                | 38.1  |
| Antiplatelet drugs                   | 7882 (16.4)               | 467 (9.3)                                        | 7415 (17.2)                                 | 23.5  |
| Lipid lowering drugs                 | 5614 (11.7)               | 382 (7.6)                                        | 5232 (12.1)                                 | 15.1  |
| NIHSS score in hospital <sup>‡</sup> |                           |                                                  |                                             |       |
| Mean±SD                              | 7.9±6.5                   | 6.4±5.3                                          | 8.0±6.6                                     | 26.7  |

(Continued)

56  
57  
58  
59  
60

Table II. Baseline characteristics of young and old ischemic stroke patients with IV tPA treatment

| Baseline characteristics                      | Total<br>(N=48141 [100%]) | Young adults<br>(< 50 years)<br>(N=5044 [10.5%]) | Old adults (≥50 years)<br>(N=43097 [89.5%]) | ASD* |
|-----------------------------------------------|---------------------------|--------------------------------------------------|---------------------------------------------|------|
| <b>Biochemical Indicators</b>                 |                           |                                                  |                                             |      |
| Glycated hemoglobin <sup>s</sup> , %          |                           |                                                  |                                             |      |
| Median (IQR)                                  | 5.8 (5.3–6.4)             | 5.6 (5.1–6.0)                                    | 5.8 (5.3–6.5)                               |      |
| BMI <sup>l</sup>                              |                           |                                                  |                                             |      |
| Mean±SD                                       | 23.6±4.2                  | 24.9±5.5                                         | 23.4±4.0                                    | 31.2 |
| Homocysteine <sup>#</sup> , μmol/L            |                           |                                                  |                                             |      |
| Median (IQR)                                  | 13.3 (10.0–18.5)          | 12.7 (9.6–18.9)                                  | 13.3 (10.1–18.5)                            |      |
| Systolic blood pressure* *, mmHg              |                           |                                                  |                                             |      |
| Mean±SD                                       | 152.5±23.8                | 148.3±24.6                                       | 153.0±23.7                                  | 19.5 |
| Diastolic blood pressure <sup>++</sup> , mmHg |                           |                                                  |                                             |      |
| Mean±SD                                       | 87.6±14.5                 | 92.1±16.1                                        | 87.1±14.2                                   | 32.9 |
| <b>Hospital characteristics, n (%)</b>        |                           |                                                  |                                             |      |
| <b>Hospital level</b>                         |                           |                                                  |                                             |      |
| Secondary hospital                            | 16479 (34.2)              | 1735 (34.4)                                      | 14744 (34.2)                                | 0.4  |
| Tertiary hospital                             | 31662 (65.8)              | 3309 (65.6)                                      | 28353 (65.8)                                | 0.4  |
| <b>Hospital region</b>                        |                           |                                                  |                                             |      |
| Eastern China                                 | 26410 (54.9)              | 2792 (55.4)                                      | 23618 (54.8)                                | 1.2  |
| Central China                                 | 15024 (31.2)              | 1630 (32.3)                                      | 13394 (31.1)                                | 2.6  |
| Western China                                 | 6707 (13.9)               | 622 (12.3)                                       | 6085 (14.1)                                 | 5.3  |

Abbreviations: IV tPA, intravenous recombinant tissue plasminogen activator; UEBMI, urban employee basic medical insurance; URBMI, urban resident basic medical insurance; NRCMS, new rural cooperative medical scheme; TIA, transient ischemic attack; CAD, coronary artery disease; MI, myocardial infarction; SD: standard deviation; IQR, interquartile range; NIHSS, National Institutes of Health Stroke Scale; ASD, absolute standardized difference.

\*: An absolute standardized difference% >10% indicates meaningful imbalance between 2 groups.

<sup>†</sup>: Smoking: having smoking experience or behaviors.

<sup>‡</sup>: Information was missing for N = 2503 patients (5.2%).

<sup>§</sup>: Information was missing for N = 4749 patients (9.9%), using the median for imputation.

<sup>||</sup>: Information was missing for N = 743 patients (1.5%), using the median for imputation.

<sup>#</sup>: Information was missing for N = 2682 patients (5.6%).

\* \*: Information was missing for N = 28 patients (0.1 %), using the median for imputation.

<sup>++</sup>: Information was missing for N = 28 patients (0.1%), using the median for imputation.

Table III. In-hospital outcomes in young (< 35 years) and old ( $\geq 35$  years) ischemic stroke patients treated with IV tPA

| Outcome                                | Total<br>(N=48141 [100%]) | young adults<br>(< 35 years )<br>(N=456 [0.9%]) | old adults ( $\geq 35$ years)<br>(N=47685[99.1%])(REF) | Model | OR (95% CI)      | P value |
|----------------------------------------|---------------------------|-------------------------------------------------|--------------------------------------------------------|-------|------------------|---------|
| sICH                                   | 414 (0.9)                 | 4 (0.9)                                         | 410 (0.9)                                              | 1     | 1.02 (0.38-2.74) | 0.9678  |
|                                        |                           |                                                 |                                                        | 2     | 1.45 (0.54-3.94) | 0.4612  |
|                                        |                           |                                                 |                                                        | 3     | 1.52 (0.56-4.13) | 0.4136  |
| In-hospital mortality                  | 579 (1.2)                 | 1 (0.2)                                         | 578 (1.2)                                              | 1     | 0.18 (0.03-1.28) | 0.0861  |
|                                        |                           |                                                 |                                                        | 2     | 0.28 (0.04-2.01) | 0.2066  |
|                                        |                           |                                                 |                                                        | 3     | 0.27 (0.04-1.97) | 0.1953  |
| Independent ambulation<br>at discharge | 26175 (54.4)              | 279 (61.2)                                      | 25896 (54.3)                                           | 1     | 1.33 (1.10-1.60) | 0.0034  |
|                                        |                           |                                                 |                                                        | 2     | 1.09 (0.90-1.32) | 0.384   |
|                                        |                           |                                                 |                                                        | 3     | 1.15 (0.92-1.42) | 0.2173  |

Abbreviations: CI, confidence interval; IV tPA, intravenous recombinant tissue plasminogen activator ; OR, odds ratio.

Model 1: Logistic regression model without adjustment.

Model 2: Adjusted for gender, insurance, BMI, previous stroke/TIA, previous CAD/prior MI, diabetes, hypertension, have smoking experience or behavior, atrial fibrillation/flutter, glyated hemoglobin, diastolic blood pressure, systolic blood pressure, hypoglycemic drugs, antihypertensive drugs, antiplatelet drugs, and lipid-lowering drugs.

Model 3: Adjusted for in-hospital NIHSS score, gender, insurance, BMI, previous stroke/TIA, previous CAD/prior MI, diabetes, hypertension, have smoking experience or behavior, atrial fibrillation/flutter, glyated hemoglobin, diastolic blood pressure, blood pressure, hypoglycemic drugs, antihypertensive drugs, antiplatelet drugs, and lipid-lowering drugs. Patients (N= 2503) with missing values on NIHSS score were not included in this analysis.

Table IV. In-hospital outcomes in young (< 45 years ) and old (≥45 years) ischemic stroke patients treated with IV tPA

| Outcome                                | Total<br>(N=48141 [100%]) | young adults<br>(< 45 years )<br>(N=2244 [4.7%]) | old adults (≥45 years)<br>(N=45897[95.3%])(REF) | Model | OR (95% CI)      | P value |
|----------------------------------------|---------------------------|--------------------------------------------------|-------------------------------------------------|-------|------------------|---------|
| sICH                                   | 414 (0.9)                 | 8 (0.4)                                          | 406 (0.9)                                       | 1     | 0.40 (0.20-0.81) | 0.0106  |
|                                        |                           |                                                  |                                                 | 2     | 0.54 (0.26-1.10) | 0.0877  |
|                                        |                           |                                                  |                                                 | 3     | 0.44 (0.19-0.99) | 0.048   |
| In-hospital mortality                  | 579 (1.2)                 | 8 (0.4)                                          | 571 (1.2)                                       | 1     | 0.28 (0.14-0.57) | 0.0004  |
|                                        |                           |                                                  |                                                 | 2     | 0.43 (0.21-0.87) | 0.0197  |
|                                        |                           |                                                  |                                                 | 3     | 0.52 (0.26-1.07) | 0.077   |
| Independent ambulation<br>at discharge | 26175 (54.4)              | 1356 (60.4)                                      | 24819 (54.1)                                    | 1     | 1.30 (1.19-1.41) | <0.0001 |
|                                        |                           |                                                  |                                                 | 2     | 1.08 (0.98-1.18) | 0.1082  |
|                                        |                           |                                                  |                                                 | 3     | 0.97 (0.88-1.08) | 0.6096  |

Abbreviations: CI, confidence interval; IV tPA, intravenous recombinant tissue plasminogen activator ; OR, odds ratio.

Model 1: Logistic regression model without adjustment.

Model 2: Adjusted for gender, insurance, BMI, previous stroke/TIA, previous CAD/prior MI, diabetes, hypertension, have smoking experience or behavior, atrial fibrillation/flutter, glycated hemoglobin, diastolic blood pressure, systolic blood pressure, hypoglycemic drugs, antihypertensive drugs, antiplatelet drugs, and lipid-lowering drugs.

Model 3: Adjusted for in-hospital NIHSS score, gender, insurance, BMI, previous stroke/TIA, previous CAD/prior MI, diabetes, hypertension, have smoking experience or behavior, atrial fibrillation/flutter, glycated hemoglobin, diastolic blood pressure, blood pressure, hypoglycemic drugs, antihypertensive drugs, antiplatelet drugs, and lipid-lowering drugs. Patients (N= 2503) with missing values on NIHSS score were not included in this analysis.



## STROBE Statement—checklist of items that should be included in reports of observational studies

| Section/item                 | Item No | Recommendation                                                                                                                                                                                                                                                                                                                                                                                                                                                         | Page No.  | Relevant text from manuscript |
|------------------------------|---------|------------------------------------------------------------------------------------------------------------------------------------------------------------------------------------------------------------------------------------------------------------------------------------------------------------------------------------------------------------------------------------------------------------------------------------------------------------------------|-----------|-------------------------------|
| Title and abstract           | 1       | (a) Indicate the study's design with a commonly used term in the title or the abstract                                                                                                                                                                                                                                                                                                                                                                                 | Page1,3,4 | Title,Abstract/Para1-2        |
|                              |         | (b) Provide in the abstract an informative and balanced summary of what was done and what was found                                                                                                                                                                                                                                                                                                                                                                    | Page3-4   | Abstract/Para2-4              |
| <b>Introduction</b>          |         |                                                                                                                                                                                                                                                                                                                                                                                                                                                                        |           |                               |
| Background/<br>rationale     | 2       | Explain the scientific background and rationale for the investigation being reported                                                                                                                                                                                                                                                                                                                                                                                   | Page7     | Introduction/Para1-2          |
| Objectives                   | 3       | State specific objectives, including any prespecified hypotheses                                                                                                                                                                                                                                                                                                                                                                                                       | Page7-8   | Introduction/Para3            |
| <b>Methods</b>               |         |                                                                                                                                                                                                                                                                                                                                                                                                                                                                        |           |                               |
| Study design                 | 4       | Present key elements of study design early in the paper                                                                                                                                                                                                                                                                                                                                                                                                                | Page8-9   | Methods/Para1                 |
| Setting                      | 5       | Describe the setting, locations, and relevant dates, including periods of recruitment, exposure, follow-up, and data collection                                                                                                                                                                                                                                                                                                                                        | Page9-10  | Methods/Para2-4               |
| Participants                 | 6       | (a) <b>Cohort study</b> —Give the eligibility criteria, and the sources and methods of selection of participants. Describe methods of follow-up<br><b>Case-control study</b> —Give the eligibility criteria, and the sources and methods of case ascertainment and control selection. Give the rationale for the choice of cases and controls<br><b>Cross-sectional study</b> —Give the eligibility criteria, and the sources and methods of selection of participants | Page8-10  | Methods/Para1-4               |
|                              |         | (b) <b>Cohort study</b> —For matched studies, give matching criteria and number of exposed and unexposed<br><b>Case-control study</b> —For matched studies, give matching criteria and the number of controls per case                                                                                                                                                                                                                                                 |           |                               |
| Variables                    | 7       | Clearly define all outcomes, exposures, predictors, potential confounders, and effect modifiers. Give diagnostic criteria, if applicable                                                                                                                                                                                                                                                                                                                               | Page9-10  | Methods/Para3-4               |
| Data sources/<br>measurement | 8*      | For each variable of interest, give sources of data and details of methods of assessment (measurement). Describe comparability of assessment methods if there is more than one group                                                                                                                                                                                                                                                                                   | Page8-11  | Methods/Para1-6               |
| Bias                         | 9       | Describe any efforts to address potential sources of bias                                                                                                                                                                                                                                                                                                                                                                                                              | Page10-12 | Methods/Para5-7               |
| Study size                   | 10      | Explain how the study size was arrived at                                                                                                                                                                                                                                                                                                                                                                                                                              | Page8-9   | Methods/Para1-2               |
| Quantitative variables       | 11      | Explain how quantitative variables were handled in the analyses. If applicable, describe which groupings were chosen and why                                                                                                                                                                                                                                                                                                                                           | Page10-11 | Methods/Para5                 |

|                     |     |                                                                                                                                                                                                                                                                                                           |           |                    |
|---------------------|-----|-----------------------------------------------------------------------------------------------------------------------------------------------------------------------------------------------------------------------------------------------------------------------------------------------------------|-----------|--------------------|
| Statistical methods | 12  | (a) Describe all statistical methods, including those used to control for confounding                                                                                                                                                                                                                     | Page10-12 | Methods/Para5-8    |
|                     |     | (b) Describe any methods used to examine subgroups and interactions                                                                                                                                                                                                                                       | Page10-11 | Methods/Para5      |
|                     |     | (c) Explain how missing data were addressed                                                                                                                                                                                                                                                               | Page11-12 | Methods/Para7      |
|                     |     | (d) <b>Cohort study</b> —If applicable, explain how loss to follow-up was addressed<br><b>Case-control study</b> —If applicable, explain how matching of cases and controls was addressed<br><b>Cross-sectional study</b> —If applicable, describe analytical methods taking account of sampling strategy | Page11-12 | Methods/Para7      |
|                     |     | (e) Describe any sensitivity analyses                                                                                                                                                                                                                                                                     | Page11-12 | Methods/Para7      |
| <b>Results</b>      |     |                                                                                                                                                                                                                                                                                                           |           |                    |
| Participants        | 13* | (a) Report numbers of individuals at each stage of study—eg numbers potentially eligible, examined for eligibility, confirmed eligible, included in the study, completing follow-up, and analysed                                                                                                         | Page12    | Results/Para1      |
|                     |     | (b) Give reasons for non-participation at each stage                                                                                                                                                                                                                                                      |           | Figure1            |
|                     |     | (c) Consider use of a flow diagram                                                                                                                                                                                                                                                                        |           | Figure1            |
| Descriptive data    | 14* | (a) Give characteristics of study participants (eg demographic, clinical, social) and information on exposures and potential confounders                                                                                                                                                                  | Page12-15 | Results/Para1-2    |
|                     |     | (b) Indicate number of participants with missing data for each variable of interest                                                                                                                                                                                                                       | Page15    | Results/table1     |
|                     |     | (c) <b>Cohort study</b> —Summarise follow-up time (eg, average and total amount)                                                                                                                                                                                                                          |           |                    |
| Outcome data        | 15* | <b>Cohort study</b> —Report numbers of outcome events or summary measures over time                                                                                                                                                                                                                       | Page15-19 | Results/Para3-6    |
|                     |     | <b>Case-control study</b> —Report numbers in each exposure category, or summary measures of exposure                                                                                                                                                                                                      |           |                    |
|                     |     | <b>Cross-sectional study</b> —Report numbers of outcome events or summary measures                                                                                                                                                                                                                        |           |                    |
| Main results        | 16  | (a) Give unadjusted estimates and, if applicable, confounder-adjusted estimates and their precision (eg, 95% confidence interval). Make clear which confounders were adjusted for and why they were included                                                                                              | Page15-19 | Results/Para3-6    |
|                     |     | (b) Report category boundaries when continuous variables were categorized                                                                                                                                                                                                                                 | Page15-17 | Results/Para3-6    |
|                     |     | (c) If relevant, consider translating estimates of relative risk into absolute risk for a meaningful time period                                                                                                                                                                                          |           |                    |
| Other analyses      | 17  | Report other analyses done—eg analyses of subgroups and interactions, and sensitivity analyses                                                                                                                                                                                                            | Page15-19 | Results/Para3-6    |
| <b>Discussion</b>   |     |                                                                                                                                                                                                                                                                                                           |           |                    |
| Key results         | 18  | Summarise key results with reference to study objectives                                                                                                                                                                                                                                                  | Page20-22 | Discussion/Para1-5 |
| Limitations         | 19  | Discuss limitations of the study, taking into account sources of potential bias or imprecision. Discuss both direction and magnitude of any potential bias                                                                                                                                                | Page22-23 | Discussion/Para6   |

|                          |    |                                                                                                                                                                            |           |                    |   |   |   |   |
|--------------------------|----|----------------------------------------------------------------------------------------------------------------------------------------------------------------------------|-----------|--------------------|---|---|---|---|
| 1                        | 2  | 3                                                                                                                                                                          | 4         | 5                  | 6 | 7 | 8 | 9 |
| Interpretation           | 20 | Give a cautious overall interpretation of results considering objectives, limitations, multiplicity of analyses, results from similar studies, and other relevant evidence | Page19-22 | Discussion/Para2-5 |   |   |   |   |
| Generalisability         | 21 | Discuss the generalisability (external validity) of the study results                                                                                                      | Page23    | Discussion/Para6   |   |   |   |   |
| <b>Other information</b> |    |                                                                                                                                                                            |           |                    |   |   |   |   |
| Funding                  | 22 | Give the source of funding and the role of the funders for the present study and, if applicable, for the original study on which the present article is based              | Page24    | Funding            |   |   |   |   |

\*Give information separately for cases and controls in case-control studies and, if applicable, for exposed and unexposed groups in cohort and cross-sectional studies.

**Note:** An Explanation and Elaboration article discusses each checklist item and gives methodological background and published examples of transparent reporting. The STROBE checklist is best used in conjunction with this article (freely available on the Web sites of PLoS Medicine at <http://www.plosmedicine.org/>, Annals of Internal Medicine at <http://www.annals.org/>, and Epidemiology at <http://www.epidem.com/>). Information on the STROBE Initiative is available at [www.strobe-statement.org](http://www.strobe-statement.org).

# BMJ Open

## Thrombolysis, Time-to-Treatment and In-Hospital Outcomes Among Young Adults with Ischemic Stroke in China: Findings from a Nationwide Registry Study in China

|                               |                                                                                                                                                                                                                                                                                                                                                                                                                                                                                                                                                                                                                                                                                                                                                                                                                                                                                                                                                                                                                                                                                                                                                                                                                                                                                                                                                                                                                                                                                                                                                                                                                                                                                                                                                                                                                                                                                                                                                                                                                                                                                                                                                                                                                                                                                                                                                                                                                                                                                                                                                                                                                |
|-------------------------------|----------------------------------------------------------------------------------------------------------------------------------------------------------------------------------------------------------------------------------------------------------------------------------------------------------------------------------------------------------------------------------------------------------------------------------------------------------------------------------------------------------------------------------------------------------------------------------------------------------------------------------------------------------------------------------------------------------------------------------------------------------------------------------------------------------------------------------------------------------------------------------------------------------------------------------------------------------------------------------------------------------------------------------------------------------------------------------------------------------------------------------------------------------------------------------------------------------------------------------------------------------------------------------------------------------------------------------------------------------------------------------------------------------------------------------------------------------------------------------------------------------------------------------------------------------------------------------------------------------------------------------------------------------------------------------------------------------------------------------------------------------------------------------------------------------------------------------------------------------------------------------------------------------------------------------------------------------------------------------------------------------------------------------------------------------------------------------------------------------------------------------------------------------------------------------------------------------------------------------------------------------------------------------------------------------------------------------------------------------------------------------------------------------------------------------------------------------------------------------------------------------------------------------------------------------------------------------------------------------------|
| Journal:                      | <i>BMJ Open</i>                                                                                                                                                                                                                                                                                                                                                                                                                                                                                                                                                                                                                                                                                                                                                                                                                                                                                                                                                                                                                                                                                                                                                                                                                                                                                                                                                                                                                                                                                                                                                                                                                                                                                                                                                                                                                                                                                                                                                                                                                                                                                                                                                                                                                                                                                                                                                                                                                                                                                                                                                                                                |
| Manuscript ID                 | bmjopen-2021-055055.R2                                                                                                                                                                                                                                                                                                                                                                                                                                                                                                                                                                                                                                                                                                                                                                                                                                                                                                                                                                                                                                                                                                                                                                                                                                                                                                                                                                                                                                                                                                                                                                                                                                                                                                                                                                                                                                                                                                                                                                                                                                                                                                                                                                                                                                                                                                                                                                                                                                                                                                                                                                                         |
| Article Type:                 | Original research                                                                                                                                                                                                                                                                                                                                                                                                                                                                                                                                                                                                                                                                                                                                                                                                                                                                                                                                                                                                                                                                                                                                                                                                                                                                                                                                                                                                                                                                                                                                                                                                                                                                                                                                                                                                                                                                                                                                                                                                                                                                                                                                                                                                                                                                                                                                                                                                                                                                                                                                                                                              |
| Date Submitted by the Author: | 15-Apr-2022                                                                                                                                                                                                                                                                                                                                                                                                                                                                                                                                                                                                                                                                                                                                                                                                                                                                                                                                                                                                                                                                                                                                                                                                                                                                                                                                                                                                                                                                                                                                                                                                                                                                                                                                                                                                                                                                                                                                                                                                                                                                                                                                                                                                                                                                                                                                                                                                                                                                                                                                                                                                    |
| Complete List of Authors:     | <p>Wang, HaiYan; Beijing Shijitan Hospital, Capital Medical University, Department of Neurology and Psychiatry</p> <p>Gu, Hongqiu; Beijing Tiantan Hospital, Capital Medical University, China National Clinical Research Center for Neurological Diseases; Beijing Tiantan Hospital, Capital Medical University, National Center for Healthcare Quality Management in Neurological Diseases</p> <p>Zhou, Qi; Beijing Tiantan Hospital, Capital Medical University, China National Clinical Research Center for Neurological Diseases; Beijing Tiantan Hospital, Capital Medical University, National Center for Healthcare Quality Management in Neurological Diseases</p> <p>Jiang, YingYu; Beijing Tiantan Hospital, Capital Medical University, China National Clinical Research Center for Neurological Diseases; Beijing Tiantan Hospital, Capital Medical University, National Center for Healthcare Quality Management in Neurological Diseases</p> <p>Yang, Xin; Beijing Tiantan Hospital, Capital Medical University, China National Clinical Research Center for Neurological Diseases; Beijing Tiantan Hospital, Capital Medical University, National Center for Healthcare Quality Management in Neurological Diseases</p> <p>Wang, Chunjuan; Beijing Tiantan Hospital, Capital Medical University, China National Clinical Research Center for Neurological Diseases; Beijing Tiantan Hospital, Capital Medical University, National Center for Healthcare Quality Management in Neurological Diseases</p> <p>Zhao, Xingquan; Beijing Tiantan Hospital, Capital Medical University, Vascular Neurology, Department of Neurology; Research Unit of Artificial Intelligence in Cerebrovascular Disease, Chinese Academy of Medical Sciences</p> <p>Wang, Yilong; Beijing Tiantan Hospital, Capital Medical University, China National Clinical Research Center for Neurological Diseases; Beijing Tiantan Hospital, Capital Medical University, Vascular Neurology, Department of Neurology</p> <p>Liu, Liping; Beijing Tiantan Hospital, Capital Medical University, Neuro-intensive Care Unit, Department of Neurology</p> <p>Meng, Xia; Beijing Tiantan Hospital, Capital Medical University, China National Clinical Research Center for Neurological Diseases</p> <p>Li, Hao; Beijing Tiantan Hospital, Capital Medical University, China National Clinical Research Center for Neurological Diseases</p> <p>Liu, Chelsea; Harvard University T H Chan School of Public Health, Department of Epidemiology</p> <p>Li, Zixiao; Beijing Tiantan Hospital, Capital Medical University, China</p> |

|                                 |                                                                                                                                                                                                                                                                                                                                                                                                                                                                                                                                                                                       |
|---------------------------------|---------------------------------------------------------------------------------------------------------------------------------------------------------------------------------------------------------------------------------------------------------------------------------------------------------------------------------------------------------------------------------------------------------------------------------------------------------------------------------------------------------------------------------------------------------------------------------------|
|                                 | National Clinical Research Center for Neurological Diseases; Beijing Tiantan Hospital, Capital Medical University, National Center for Healthcare Quality Management in Neurological Diseases<br>Wang, Yongjun; Beijing Tiantan Hospital, Capital Medical University, China National Clinical Research Center for Neurological Diseases; Beijing Tiantan Hospital, Capital Medical University, National Center for Healthcare Quality Management in Neurological Diseases<br>Jiang, Yong; Beijing Tiantan Hospital, China National Clinical Research Center for Neurological Diseases |
| <b>Primary Subject Heading</b>: | Neurology                                                                                                                                                                                                                                                                                                                                                                                                                                                                                                                                                                             |
| Secondary Subject Heading:      | Public health                                                                                                                                                                                                                                                                                                                                                                                                                                                                                                                                                                         |
| Keywords:                       | Adult neurology < NEUROLOGY, Stroke < NEUROLOGY, VASCULAR MEDICINE                                                                                                                                                                                                                                                                                                                                                                                                                                                                                                                    |
|                                 |                                                                                                                                                                                                                                                                                                                                                                                                                                                                                                                                                                                       |

SCHOLARONE™  
Manuscripts



I, the Submitting Author has the right to grant and does grant on behalf of all authors of the Work (as defined in the below author licence), an exclusive licence and/or a non-exclusive licence for contributions from authors who are: i) UK Crown employees; ii) where BMJ has agreed a CC-BY licence shall apply, and/or iii) in accordance with the terms applicable for US Federal Government officers or employees acting as part of their official duties; on a worldwide, perpetual, irrevocable, royalty-free basis to BMJ Publishing Group Ltd ("BMJ") its licensees and where the relevant Journal is co-owned by BMJ to the co-owners of the Journal, to publish the Work in this journal and any other BMJ products and to exploit all rights, as set out in our [licence](#).

The Submitting Author accepts and understands that any supply made under these terms is made by BMJ to the Submitting Author unless you are acting as an employee on behalf of your employer or a postgraduate student of an affiliated institution which is paying any applicable article publishing charge ("APC") for Open Access articles. Where the Submitting Author wishes to make the Work available on an Open Access basis (and intends to pay the relevant APC), the terms of reuse of such Open Access shall be governed by a Creative Commons licence – details of these licences and which [Creative Commons](#) licence will apply to this Work are set out in our licence referred to above.

Other than as permitted in any relevant BMJ Author's Self Archiving Policies, I confirm this Work has not been accepted for publication elsewhere, is not being considered for publication elsewhere and does not duplicate material already published. I confirm all authors consent to publication of this Work and authorise the granting of this licence.

## Title Page

# Thrombolysis, Time-to-Treatment and In-Hospital Outcomes Among Young Adults with Ischemic Stroke in China: Findings from a Nationwide Registry Study in China

Hai-Yan Wang<sup>1</sup> \*; Hong-Qiu Gu<sup>2,3</sup> \*; Qi Zhou<sup>2,3</sup>; Ying-Yu Jiang<sup>2,3</sup>; Xin Yang<sup>2,3</sup>; Chun-Juan Wang<sup>2,3</sup>; Xing-Quan Zhao<sup>4,5</sup>; Yi-Long Wang<sup>2,4</sup>; Li-Ping Liu<sup>6</sup>; Xia Meng<sup>2</sup>; Hao Li<sup>2</sup>; Chelsea Liu<sup>7</sup>; Zi-Xiao Li<sup>2,3</sup>; Yong-Jun Wang<sup>2,3</sup>; Yong Jiang<sup>2</sup> #;

<sup>1</sup>Department of Neurology, Beijing Shijitan Hospital, Capital Medical University, Beijing, China

<sup>2</sup>China National Clinical Research Center for Neurological Diseases, Beijing Tiantan Hospital, Capital Medical University, Beijing, China

<sup>3</sup>National Center for Healthcare Quality Management in Neurological Diseases, Beijing Tiantan Hospital, Capital Medical University, Beijing, China

<sup>4</sup>Vascular Neurology, Department of Neurology, Beijing Tiantan Hospital, Capital Medical University, Beijing, China

<sup>5</sup>Research Unit of Artificial Intelligence in Cerebrovascular Disease, Chinese Academy of Medical Sciences, Beijing, China

<sup>6</sup>Neuro-intensive Care Unit, Department of Neurology, Beijing Tiantan Hospital, Capital Medical University, Beijing, China

<sup>7</sup>Department of Epidemiology, Harvard T.H. Chan School of Public Health, Boston, MA, USA

<sup>8</sup>Beijing Key Laboratory of Translational Medicine for Cerebrovascular Disease, Beijing, China

<sup>9</sup>Center for Stroke, Beijing Institute for Brain Disorders, Beijing, China

\* Hai-Yan Wang and Hong-Qiu Gu contributed equally to this paper.

## #ADDRESS FOR CORRESPONDENCE

Yong Jiang

China National Clinical Research Center for Neurological Diseases, Beijing Tiantan Hospital, Capital Medical University

No.119 West Road, Southern Fourth Ring Road, Fengtai District, Beijing, China, 100070

1  
2  
3  
4 Tel: 86-10-59975806

5  
6 Email: [jiangyong@ncrcnd.org.cn](mailto:jiangyong@ncrcnd.org.cn)  
7  
8  
9

10  
11 **Key words:** ischemic stroke, young stroke, thrombolysis, door-to-needle time  
12  
13  
14  
15

16  
17 **Word Count:** 2612  
18  
19  
20  
21  
22  
23  
24  
25  
26  
27  
28  
29  
30  
31  
32  
33  
34  
35  
36  
37  
38  
39  
40  
41  
42  
43  
44  
45  
46  
47  
48  
49  
50  
51  
52  
53  
54  
55  
56  
57  
58  
59  
60

For peer review only



## ABSTRACT

**Background and purpose** We aimed to determine whether young adults (< 50 years) with acute ischemic stroke (AIS) are more likely to receive intravenous tissue plasminogen activator (IV tPA) and have shorter time to treatment than older stroke patients.

**Methods** We analyzed data from the Chinese Stroke Center Alliance (CSCA) registry for AIS patients hospitalized between August 2015 and July 2019. Patients were classified into two groups according to age: young adults (< 50 years of age) and older adults ( $\geq$  50 years of age).

**Results** Of 793 175 patients with AIS admitted to 1471 hospitals, 9.1% (71 860) were young adults. Compared to older adults, a higher proportion of young adults received IV tPA among patients without contraindications (7.2% vs. 6.1%, adjusted odds ratio [aOR] 1.13, 95% confidence interval [CI] 1.10-1.17) and among patients without contraindications and with onset-to-door time  $\leq$ 3.5h (23.6 % vs. 19.3%, aOR 1.20, 95% CI 1.15-1.24). We did not observe differences in onset-to-needle time (median hours 2.7h) or door-to-needle time (DNT) (median minutes 60m) between young and older adults. The proportion of DNT $\leq$ 30 minutes, DNT $\leq$ 45 minutes, and DNT $\leq$ 60 minutes in young and older IV tPA treated patients were 16.9% vs 18.8%, 30.2% vs 32.8% and 50.2% vs 54.2%, respectively. Compared to older adults, young adults treated with IV tPA had lower odds of in-hospital mortality (0.5% vs 1.3%,

1  
2  
3  
4 aOR 0.54, 95% CI 0.35-0.82) and higher odds of independent ambulation at discharge  
5  
6  
7 (61.0% vs 53.6%, aOR 1.15, 95% CI 1.08-1.22), and the associations may be partly  
8  
9 explained by stroke severity measured by NIHSS score.  
10  
11

12 **Conclusion** Young adults with AIS were more likely to receive IV tPA than older  
13  
14 adults, though there was no difference between the two groups in time to treatment.  
15  
16

17 Compared with older adults, young adults may had better in-hospital outcomes.  
18  
19

20  
21  
22  
23 **Key words:** ischemic stroke, young stroke, thrombolysis, door-to-needle time  
24  
25  
26  
27  
28  
29  
30  
31  
32  
33  
34  
35  
36  
37  
38  
39  
40  
41  
42  
43  
44  
45  
46  
47  
48  
49  
50  
51  
52  
53  
54  
55  
56  
57  
58  
59  
60

## Strengths and limitations of this study

- We used data from a large-scale, nationwide, hospital-based, multicenter quality improvement initiative.
- Multiple regression models adjusted for different levels of covariates were used to check the robustness of the results ;
- Data on intra-arterial therapies, puncture times, door-to-imaging, and follow-up outcomes after discharge were not collected and reported.

## ABBREVIATIONS

CSA: Chinese Stroke Association

CSCA: Chinese Stroke Center Alliance

QI: quality improvement

AIS: acute ischemic stroke

BMI: body mass index

mRS: modified Rankin Scale score

aOR: adjusted odds ratios

CI: confidence intervals

IV tPA: intravenous tissue plasminogen activator

IQR: interquartile range

NIHSS: National Institutes of Health Stroke Scale

DNT: door-to-needle time

sICH: symptomatic intracranial hemorrhage

## INTRODUCTION

Stroke incidence among adults under 50 years of age has risen in recent years.<sup>1-5</sup> This creates a significant socioeconomic burden due to high healthcare costs and loss of labor productivity.<sup>5,6</sup> According to the 2019 Chinese Stroke Statistics, 81.9% of stroke patients had ischemic strokes,<sup>7</sup> of which young adults constituted 15–18%.<sup>8</sup> Given this trend, researchers must carefully consider the clinical features and best practices of treatment for strokes in young adults.<sup>8</sup>

Ischemic stroke is a common, preventable, and treatable disease that typically results from thrombotic or thromboembolic blockage of a cerebral artery.<sup>9</sup> Revascularization therapy plays a major role in the process of saving penumbral tissue from infarction.<sup>10</sup> Tissue plasminogen activator (tPA) is the main intravenous drug approved for the treatment of acute ischemic stroke.<sup>11</sup> Treatment of acute occlusive stroke with IV tPA is considered the most regular and important method when given within 4.5 hours of occlusion.<sup>12,13</sup> While epidemiological studies have been done in other countries regarding IV tPA treatment in young AIS patients, there is limited research on this topic in China.<sup>13-17</sup>

The purpose of this study was to compare the characteristics, IV tPA treatment rates, onset-to-needle time, door-to-needle time (DNT) and in-hospital outcomes of young (<50 years of age) and older ( $\geq 50$  years of age) AIS patients in the Chinese Stroke

1  
2  
3  
4 Center Alliance (CSCA). We hypothesized that young AIS patients would be treated  
5  
6 more frequently with IV tPA, have shorter treatment time and better in-hospital  
7  
8 outcomes compared to older adults.  
9  
10

## 11 12 13 14 15 **METHODS**

### 16 17 18 **Data source**

19  
20  
21  
22 CSCA is a national, hospital-based, multicentre, voluntary, multifaceted intervention  
23  
24 and continuous quality improvement initiative. The data coordinating center of CSCA  
25  
26 resides at the China National Clinical Research Center for Neurological Diseases  
27  
28 (NCRCND), Beijing Tiantan Hospital.<sup>18</sup> Trained personnel collected patient  
29  
30 demographics, medical history, medications, DNT, and in-hospital outcomes, then  
31  
32 entered this information into a database using a web-based Patient Management Tool  
33  
34 (Medicine Innovation Research Center, Beijing, China). The tool is characterized by  
35  
36 predefined logic features, range checks, and user alerts to identify a potentially invalid  
37  
38 format or value entries and to optimize data quality at the time of entry. Training in  
39  
40 the use of the tool was provided online and onsite for all users. However, data  
41  
42 collected by hospitals were not independently audited by external chart review. In  
43  
44 addition, The China National Clinical Research Center for Neurological Diseases  
45  
46 serves as the data analysis center and has an agreement to analyze the aggregate  
47  
48 deidentified data for care quality feedback and research purposes. We abstracted 838  
49  
50  
51  
52  
53  
54  
55  
56  
57  
58  
59  
60

1  
2  
3  
4 229 cases and identified 793 175 patients admitted with ischemic strokes from 2015 to  
5  
6  
7 2019.

## 10 **Study population**

13 In the first stage, our analyses included patients admitted with AIS within 7 days of  
14  
15 the onset of symptoms between August 1, 2015 and July 31, 2019 from 1473 hospitals.  
16  
17 (supplemental material table I )We excluded patients who had in-hospital strokes  
18  
19 (n=7941, 0.95%), were missing IV tPA information (n=17461, 2.08%), had imprecise  
20  
21 or undocumented arrival times (n=12), transferred in from an acute care hospital  
22  
23 (n=1777, 0.212%), or had contraindications to venous thrombolysis within the time  
24  
25 window (n=17863, 2.13%). This yielded a population of patients with ischemic  
26  
27 strokes with indications for thrombolysis (n=793175). To analyze DNT and  
28  
29 in-hospital outcomes of ischemic stroke, we excluded patients treated with IV tPA  
30  
31 more than 4.5 hours after stroke onset (n=1315, 0.17%) and patients who were not  
32  
33 treated with IV tPA (n=743719, 93.76%). This yielded a subset of the study  
34  
35 population that consisted of 48141 AIS patients from 1290 hospitals (Figure 1).  
36  
37  
38  
39  
40  
41  
42  
43  
44  
45  
46

## 47 **Outcomes**

48  
49  
50 The IV tPA treatment rate was assessed among two populations. First, IV tPA rate  
51  
52 among patients without contraindications to thrombolytic therapy was calculated as  
53  
54 the number of IV tPA cases divided by the total number of ischemic stroke cases  
55  
56 without any contraindications to thrombolytic therapy. Then IV tPA rate among  
57  
58  
59  
60

1  
2  
3  
4 patients without contraindication to thrombolytic therapy and with onset-to-door time  
5  
6  $\leq 3.5$ h was calculated as the number of IV tPA cases divided by the total number of  
7  
8 ischemic stroke cases without any contraindications to thrombolytic therapy and  
9  
10 arrived at a hospital within 3.5 hours after stroke onset. The contraindications were  
11  
12 defined according to guidelines for the early management of patients with acute  
13  
14 ischemic stroke from the Heart Association/American Stroke Association and Chinese  
15  
16 Society of Neurology. DNT was defined as the time between arrival at the emergency  
17  
18 department (ED) and time of intravenous (IV) thrombolysis, and is an important  
19  
20 metric in AIS treatment.<sup>19,20</sup> We analyzed DNT as a binary outcome three times with a  
21  
22 different cut-off point each time ( $\leq 30$ ,  $\leq 45$ , or  $\leq 60$  minutes, respectively).  
23  
24  
25  
26  
27  
28  
29  
30  
31  
32  
33

34 In-hospital outcomes included symptomatic intracranial hemorrhage (sICH),  
35  
36 in-hospital mortality, and independent ambulation at discharge. sICH was defined as  
37  
38 intracranial hemorrhage (ICH) within 36 hours of admission, documented by CT or  
39  
40 MRI, with the treating physician's notes indicating clinical deterioration attributable  
41  
42 to hemorrhage. Patients who were able to walk < 48 hours after hospital admission  
43  
44 were considered to have independent ambulation at discharge.  
45  
46  
47  
48  
49

## 50 51 **Statistical analysis**

52  
53  
54 Continuous variables with normal distribution were expressed as mean and SD, and  
55  
56 those with skewed/non-normal distribution as medians and interquartile ranges (IQR).  
57  
58  
59 Categorical variables were summarised as frequencies and percentages. Because of  
60



1  
2  
3  
4 the large sample size, some statistically significant differences may not be clinically  
5  
6 meaningful. We used absolute standardized differences (ASD) or Hodges–Lehmann  
7  
8 estimator to compare differences in baseline characteristics between young and older  
9  
10 adults independent of sample size. An ASD larger than 10% was considered  
11  
12  
13  
14  
15 meaningful imbalance.<sup>21</sup>

16  
17 For outcomes such as IV tPA treatment and in-hospital outcomes, logistic regression  
18  
19 models were performed to determine adjusted odds ratios (aORs) and 95% confidence  
20  
21 intervals (CIs). Multivariable models with different level of adjustment were used to  
22  
23 check the robustness of the results. Covariates in multivariable models including  
24  
25 gender, insurance status, body mass index (BMI), medical history of prior stroke or  
26  
27 transient ischemic attack (TIA), coronary artery disease (CAD) or prior myocardial  
28  
29 infarction (MI), diabetes mellitus, hypertension, smoking status, atrial  
30  
31 fibrillation/flutter, glycated hemoglobin, diastolic blood pressure, systolic blood  
32  
33 pressure, medication history (hypoglycemic drugs, antihypertensive drugs, antiplatelet  
34  
35 drugs, and lipid lowering drugs), and hospital grade.

36  
37  
38  
39  
40  
41  
42  
43  
44  
45  
46  
47 There were few missing data for most variables, with the exceptions of the in-hospital  
48  
49 NIHSS score (missing 19.4%), DNT (6.3%), glycated hemoglobin (10.6%) and BMI  
50  
51 (1.6%). For continuous variables missing less than 15%, the median was used for  
52  
53 imputation. Since the NIHSS score is a widely used tool for assessing stroke  
54  
55 severity<sup>22</sup> and contributes important information to AIS prognosis,<sup>23</sup> sensitivity  
56  
57  
58  
59  
60

1  
2  
3  
4 analyses adjusting for the NIHSS score were conducted. In addition, results from  
5  
6 multiple imputation were also provided.  
7  
8  
9

10  
11 All statistical analyses were performed using SAS Version 9.4 (SAS Institute, Cary,  
12  
13 NC, USA) and the %ggBaseline SAS macro.<sup>24</sup> Two-sided p-values of <0.05 were  
14  
15 considered statistically significant.  
16  
17  
18  
19

## 20 21 **Patient and public involvement**

22  
23  
24  
25 Patients or the public were not involved in the design, or conduct, or reporting, or  
26  
27 dissemination plans of our research.  
28  
29

## 30 31 **RESULTS**

32  
33  
34 Of 838 229 patients with AIS in the CSCA, 793 175 patients enrolled from 1471  
35  
36 hospitals were eligible for inclusion in this study. The median age was 67.0 years  
37  
38 (range: 58.0-75.0) and 62.7% were men. A total of 261 760 (33.0%) patients had  
39  
40 previous stroke/TIA, 69 810 (8.8%) had coronary artery disease or myocardial  
41  
42 infarction (CAD/prior MI), 170 638 (21.5%) had diabetes, 510 928 (64.4%) had  
43  
44 hypertension, 294 708 (37.2%) were smokers, and 40 231 (5.1%) had atrial  
45  
46 fibrillation/flutter.  
47  
48  
49  
50  
51  
52  
53

## 54 55 **Clinical characteristics**

56  
57  
58 A total of 71 860 (9.1%) patients were young adults (<50 years) and 721 315 (90.9%)  
59  
60

1  
2  
3  
4 were older adults ( $\geq 50$  years). The mean age among young adults was  $43.8 \pm 5.3$  years  
5  
6 and  $68.3 \pm 10.0$  years among older adults. A larger proportion of the young adults were  
7  
8 men (76.3% vs 61.3%) and did not have health insurance coverage (12.9% vs 5.7%),  
9  
10 compared to older adults. Young adults had a lower prevalence of cardiovascular risk  
11  
12 factors compared to older adults, including history of stroke or TIA (22.5% vs 34.0%),  
13  
14 CAD/prior MI (4.0% vs 9.3%), diabetes mellitus (15.3% vs 22.1%), hypertension  
15  
16 (53.9% vs 65.5%), and atrial fibrillation (1.2% vs 5.5%). Young adults had a lower  
17  
18 rate of medication use than older adults, including hypoglycemic drugs (10.9% vs  
19  
20 17.4%), antihypertensive drugs (33.5% vs 48%), antiplatelet drugs (14.6% vs 21.5%),  
21  
22 and lipid lowering drugs (11.4% vs 15.3%). However, diastolic blood pressure in  
23  
24 young adults was significantly higher than that of older adults ( mean $\pm$ SD  $92.3 \pm 16.1$   
25  
26 vs mean $\pm$ SD  $86.5 \pm 13.5$ ), and young adults had a statistically higher mean BMI than  
27  
28 older adults (mean $\pm$ SD  $24.9 \pm 4.8$  vs mean $\pm$ SD  $23.9 \pm 4.2$ ). The proportion of young  
29  
30 adults who smoked was also higher than that of older adults (49.9% vs 35.9%) (Table  
31  
32  
33  
34  
35  
36  
37  
38  
39  
40  
41  
42  
43  
44  
45  
46  
47  
48  
49  
50  
51  
52  
53  
54  
55  
56  
57  
58  
59  
60  
1).

**Table 1. Baseline characteristics of young and old ischemic stroke patients**

| Baseline characteristics       | Total<br>(N=793175 [100%]) | Young adults<br>( $< 50$ years)<br>(N=71860 [9.1%]) | Old adults<br>( $\geq 50$ years)<br>(N=721315 [90.9%]) | ASD (%) / H-L<br>Estimator* |
|--------------------------------|----------------------------|-----------------------------------------------------|--------------------------------------------------------|-----------------------------|
| <b>Patient characteristics</b> |                            |                                                     |                                                        |                             |
| Age, years                     | 66.1 $\pm$ 12.0            | 43.8 $\pm$ 5.3                                      | 68.3 $\pm$ 10.0                                        | 306.1                       |
| Male, n (%)                    | 496960 (62.7)              | 54850 (76.3)                                        | 442110 (61.3)                                          | 32.8                        |
| <b>Insurance status, n (%)</b> |                            |                                                     |                                                        |                             |
| UEBMI                          | 225940 (28.5)              | 19160 (26.7)                                        | 206780 (28.7)                                          | 4.5                         |
| URBMI                          | 149839 (18.9)              | 12393 (17.2)                                        | 137446 (19.1)                                          | 4.9                         |

1  
2  
3  
4  
5  
6  
7  
8  
9  
10  
11  
12  
13  
14  
15  
16  
17  
18  
19  
20  
21  
22  
23  
24  
25  
26  
27  
28  
29  
30  
31  
32  
33  
34  
35  
36  
37  
38  
39  
40  
41  
42  
43  
44  
45  
46  
47  
48  
49  
50  
51  
52  
53  
54  
55  
56  
57  
58  
59  
60

|                                               |                  |                  |                  |      |
|-----------------------------------------------|------------------|------------------|------------------|------|
| NRCMS                                         | 333979 (42.1)    | 27587 (38.4)     | 306392 (42.5)    | 8.4  |
| Self-pa                                       | 50727 (6.4)      | 9263 (12.9)      | 41464 (5.7)      | 25.0 |
| Other                                         | 32690 (4.1)      | 3457 (4.8)       | 29233 (4.1)      | 3.4  |
| Arrive mode, n (%)                            |                  |                  |                  |      |
| Ambulance                                     | 89484 (11.3)     | 7170 (10.0)      | 82314 (11.4)     | 4.5  |
| Private car                                   | 372727 (47.0)    | 33340 (46.4)     | 339387 (47.1)    | 1.4  |
| Taxi                                          | 68801 (8.7)      | 6743 (9.4)       | 62058 (8.6)      | 2.8  |
| Bicycle or tricycle                           | 7237 (0.9)       | 577 (0.8)        | 6660 (0.9)       | 1.1  |
| Helicopter                                    | 338 (0.0)        | 27 (0.0)         | 311 (0.0)        |      |
| Mobile stroke unit                            | 246 (0.0)        | 24 (0.0)         | 222 (0.0)        |      |
| Other                                         | 254342 (32.1)    | 23979 (33.4)     | 230363 (31.9)    | 3.2  |
| Medical history, n (%)                        |                  |                  |                  |      |
| Previous stroke/TIA                           | 261760 (33.0)    | 16197 (22.5)     | 245563 (34.0)    | 25.8 |
| CAD/prior MI                                  | 69810 (8.8)      | 2906 (4.0)       | 66904 (9.3)      | 21.4 |
| Diabetes                                      | 170638 (21.5)    | 10985 (15.3)     | 159653 (22.1)    | 17.5 |
| Peripheral vascular disease                   | 13512 (1.7)      | 718 (1.0)        | 12794 (1.8)      | 6.8  |
| Hypertension                                  | 510928 (64.4)    | 38722 (53.9)     | 472206 (65.5)    | 23.8 |
| Smoking <sup>†</sup>                          | 294708 (37.2)    | 35848 (49.9)     | 258860 (35.9)    | 28.6 |
| Atrial fibrillation/flutter                   | 40231 (5.1)      | 886 (1.2)        | 39345 (5.5)      | 24.1 |
| Dyslipidemia                                  | 60605 (7.6)      | 5861 (8.2)       | 54744 (7.6)      | 2.2  |
| Carotid stenosis                              | 10161 (1.3)      | 509 (0.7)        | 9652 (1.3)       | 6.0  |
| Medication history, n (%)                     |                  |                  |                  |      |
| Anticoagulants                                | 31326 (3.9)      | 2394 (3.3)       | 28932 (4.0)      | 3.7  |
| Hypoglycemic drugs                            | 133244 (16.8)    | 7802 (10.9)      | 125442 (17.4)    | 18.7 |
| Antihypertensive drugs                        | 370017 (46.7)    | 24065 (33.5)     | 345952 (48.0)    | 29.8 |
| Antiplatelet drugs                            | 165771 (20.9)    | 10482 (14.6)     | 155289 (21.5)    | 18.0 |
| Lipid lowering drugs                          | 118827 (15.0)    | 8171 (11.4)      | 110656 (15.3)    | 11.5 |
| NIHSS score in hospital <sup>‡</sup>          | 3.0 (2.0–6.0)    | 3.0 (1.0–5.0)    | 3.0 (2.0–6.0)    |      |
| Biochemical Indicators                        |                  |                  |                  |      |
| Glycated hemoglobin <sup>§</sup> , %          | 5.8 (5.3–6.5)    | 5.7 (5.2–6.1)    | 5.8 (5.3–6.5)    |      |
| BMI <sup>  </sup>                             | 24.0±4.3         | 24.9±4.8         | 23.9±4.2         | 22.2 |
| Homocysteine <sup>#</sup> , μmol/L            | 13.9 (10.4–19.1) | 13.4 (10.0–19.0) | 13.9 (10.5–19.1) |      |
| Systolic blood pressure <sup>* *</sup> , mmHg | 150.0±23.0       | 147.9±24.4       | 150.2±22.8       | 9.7  |
| Diastolic blood pressure <sup>††</sup> , mmHg | 87.0±13.9        | 92.3±16.1        | 86.5±13.5        | 39.0 |
| Hospital characteristics, n (%)               |                  |                  |                  |      |
| Hospital level                                |                  |                  |                  |      |
| Secondary hospital                            | 303790 (38.3)    | 23993 (33.4)     | 279797 (38.8)    | 11.3 |
| Tertiary hospital                             | 489385 (61.7)    | 47867 (66.6)     | 441518 (61.2)    | 11.3 |
| Hospital region                               |                  |                  |                  |      |
| Eastern China                                 | 365579 (46.1)    | 32744 (45.6)     | 332835 (46.1)    | 1.0  |

|               |               |              |               |     |
|---------------|---------------|--------------|---------------|-----|
| Central China | 262618 (33.1) | 24477 (34.1) | 238141 (33.0) | 2.3 |
| Western China | 164978 (20.8) | 14639 (20.4) | 150339 (20.8) | 1.0 |

Abbreviations: UEBMI, urban employee basic medical insurance; URBMI, urban resident basic medical insurance; NRCMS, new rural cooperative medical scheme; TIA, transient ischemic attack; CAD, coronary artery disease; MI, myocardial infarction; SD: standard deviation; IQR, interquartile range; NIHSS, National Institutes of Health Stroke Scale; ASD, absolute standardized difference.

\*HL estimator, Hodges–Lehmann estimator; an absolute standardized difference (%) >10% indicates meaningful imbalance between 2 groups.

†Smoking: having smoking experience or behaviors.

‡Information was missing for N=154052 patients (19.4%).

§Information was missing for N=84393 patients (10.6%); median was used for imputation.

|| Information was missing for N=12698 patients (1.6%); median was used for imputation.

#Information was missing for N= 35781 patients (4.5%).

\*\* Information was missing for N=245 patients (≈0.0%); median was used for imputation.

††Information was missing for N=251 patients (≈0.0%); median was used for imputation.

## IV tPA treatment rates

Young adults were treated more frequently with IV tPA than older adults among patients without contraindications to thrombolysis (7.2% vs 6.1%, aOR 1.13, 95% CI 1.10-1.17) and among patients without contraindication and with onset-to-door time  $\leq$  3.5h (23.6 % vs. 19.3%, aOR 1.20, 95% CI 1.15-1.24). Data from sensitivity analyses showed consistent results.(Table 2)

**Table 2. Multivariable analysis of IV tPA treatment by age group**

| Treatment                                                                              | Rate of IV-tPA      | aOR (95% CI)<br>from model 1 | aOR (95% CI)<br>from model 2 | aOR (95% CI)<br>from model 3 | aOR (95% CI)<br>from model 4 |
|----------------------------------------------------------------------------------------|---------------------|------------------------------|------------------------------|------------------------------|------------------------------|
| IV tPA among patients without contraindications                                        | 49456/793175 (6.2)  |                              |                              |                              |                              |
| Young adults                                                                           | 5181/71860 (7.2)    | 1.19 (1.15-1.22)             | 1.13 (1.10-1.17)             | 1.20 (1.16-1.24)             | 1.19(1.15-1.22)              |
| Old adults                                                                             | 44275/721315 (6.1)  | 1.00                         | 1.00                         | 1.00                         | 1.00                         |
| IV tPA among patients without contraindication and with onset-to-door time $\leq$ 3.5h | 45842/232905(19.7)  |                              |                              |                              |                              |
| Young adults                                                                           | 4768/20191 (23.6)   | 1.29 (1.25-1.34)             | 1.20 (1.15-1.24)             | 1.24 (1.20-1.29)             | 1.23(1.19-1.28)              |
| Old adults                                                                             | 41074/212714 (19.3) | 1.00                         | 1.00                         | 1.00                         | 1.00                         |

Abbreviations: CI, confidence interval; IV tPA, intravenous recombinant tissue plasminogen activator; OR, odds ratio.

Model 1: Logistic regression model without adjustment.

Model 2: adjusted for gender, insurance, BMI, previous stroke/TIA, previous CAD/prior MI, diabetes, hypertension, have smoking experience or behavior, atrial fibrillation/flutter, glyated, hemoglobin, diastolic blood pressure, hypoglycemic drugs, antihypertensive drugs, antiplatelet drugs, lipid-lowering drugs, and hospital level.

Model 3: adjusted for were in-hospital NIHSS score, gender, insurance, BMI, previous stroke/TIA, previous CAD/prior MI, diabetes, hypertension, have smoking experience or behavior, atrial fibrillation/flutter, glyated hemoglobin, diastolic blood pressure, hypoglycemic drugs, antihypertensive drugs, antiplatelet drugs, lipid-lowering drugs, and hospital level. Patients (N= 154052) with missing values on NIHSS score were not included in this analysis.

model 4: results from multiple imputation.

## Treatment time

While young adults were more likely to receive IV tPA, there was no significant difference in onset-to-needle time (median 2.7 hours, IQR 2.0–3.5 for both groups) and DNT (median 60.0 minutes, IQR 42.0–90.0 vs median 60.0 minutes, IQR 36.0–84.0) among young and older adults. DNT was also analyzed as a binary outcome at three levels: DNT  $\leq$ 30, DNT  $\leq$ 45, and DNT  $\leq$ 60 minutes. There were no significant differences between the two groups on any DNT level (16.9% vs 18.8%; 30.2% vs 32.8%; 50.2% vs 54.2%) (Table 3).

**Table 3. Treatment time in young and old ischemic stroke patients treated with IV tPA**

| Measures                             | Total<br>(N=48141 [100%]) | Young adults<br>(< 50 years)<br>(N=5044 [10.5%]) | Old adults<br>( $\geq$ 50 years)<br>(N=43097 [89.5%]) | ASD<br>(%)/H-L<br>Estimator<br>* |
|--------------------------------------|---------------------------|--------------------------------------------------|-------------------------------------------------------|----------------------------------|
| Onset-to-needle time <sup>†</sup> ,h | 2.7 (2.0–3.5)             | 2.7 (2.0–3.5)                                    | 2.7 (2.0–3.5)                                         |                                  |
| DNT <sup>‡</sup> ,min                | 60.0 (36.0–84.0)          | 60.0 (42.0–90.0)                                 | 60.0 (36.0–84.0)                                      |                                  |
| Treatment time                       |                           |                                                  |                                                       |                                  |
| DNT $\leq$ 30 minutes                | 8938 (18.6)               | 850 (16.9)                                       | 8088 (18.8)                                           | 5.0                              |
| DNT $\leq$ 45 minutes                | 15637 (32.5)              | 1521 (30.2)                                      | 14116 (32.8)                                          | 5.6                              |

|                |              |             |              |     |
|----------------|--------------|-------------|--------------|-----|
| DNT≤60 minutes | 25884 (53.8) | 2531 (50.2) | 23353 (54.2) | 8.0 |
|----------------|--------------|-------------|--------------|-----|

Abbreviations: CI=confidence interval; IV tPA, intravenous recombinant tissue plasminogen activator; DNT, door-to-needle time; ASD, absolute standardized difference.

\*HL estimator, Hodges–Lehmann estimator; an absolute standardized difference (%) >10% indicates meaningful imbalance between 2 groups.

†Onset-to-needle time was missing for 3818 (7.9%) patients, with 431(8.5%) in age <50 and 3387(7.9%) in ≥ 50 groups.

‡DNT was missing for 3027(6.3%) patients, with 342 (6.8%) in age <50 and 2685(6.2%) in ≥ 50 groups.

## In-hospital outcomes

In-hospital outcomes including sICH, in-hospital mortality, and independent ambulation at discharge were summarized in Table 4. Multiple logistic regression with adjustments of unbalanced covariates (ASD% >10% in Supplemental Table II) showed that young adults had non-significantly lower rates of sICH (0.5% vs 0.9%, aOR=0.74, 95% CI 0.49-1.11) than older adults. However, young adults had significantly lower rates of in-hospital mortality (0.5% vs 1.3%, aOR=0.54, 95% CI 0.35-0.82) and were more likely to be independently ambulating at discharge (61.0% vs 53.6%, aOR=1.15, 95% CI 1.08-1.22).

In sensitivity analyses adjusted for NIHSS scores, young adults had non-significantly lower odds of sICH (aOR=0.77, 95%CI 0.5-1.18), in-hospital mortality (aOR=0.70, 95%CI 0.46-1.09), and a neutral association with independent ambulation at discharge (aOR=1.00, 95% CI 0.93-1.08). Sensitivity analysis using different age cut-off point (<35 years and ≥ 35 years) showed consistent results with primary analysis

1  
2  
3  
4 (supplemental material table III). But when we used another age cut of point (<45  
5  
6 years and  $\geq 45$  years ), we had a lower sICH rate (aOR=0.44, 95% CI 0.19-0.99) in  
7  
8  
9 the young group (supplemental material table IV).  
10  
11  
12  
13  
14  
15  
16  
17  
18  
19  
20  
21  
22  
23  
24  
25  
26  
27  
28  
29  
30  
31  
32  
33  
34  
35  
36  
37  
38  
39  
40  
41  
42  
43  
44  
45  
46  
47  
48  
49  
50  
51  
52  
53  
54  
55  
56  
57  
58  
59  
60

For peer review only



**Table 4. In-hospital outcomes in young and old ischemic stroke patients treated with IV tPA**

| Outcome                             | Rate of outcomes   | aOR (95% CI) from model 1 | aOR (95% CI) from model 2 | aOR (95% CI) from model 3 | aOR (95% CI) from model 4 |
|-------------------------------------|--------------------|---------------------------|---------------------------|---------------------------|---------------------------|
| sICH                                | 414/48141 (0.9)    |                           |                           |                           |                           |
| Young adults                        | 26/5044(0.5)       | 0.57 (0.38-0.85)          | 0.74 (0.49-1.11)          | 0.77 (0.5-1.18)           | 0.79(0.52-1.20)           |
| Old adults                          | 388/43097(0.9)     | 1.00                      | 1.00                      | 1.00                      | 1.00                      |
| In-hospital mortality               | 579/48141 (1.2)    |                           |                           |                           |                           |
| Young adults                        | 24/5044(0.5)       | 0.37 (0.24-0.55)          | 0.54 (0.35-0.82)          | 0.70 (0.46-1.09)          | 0.65(0.43-1.00)           |
| Old adults                          | 555/43097(1.3)     | 1.00                      | 1.00                      | 1.00                      | 1.00                      |
| Independent ambulation at discharge | 26175/48141 (54.4) |                           |                           |                           |                           |
| Young adults                        | 3079/5044(61.0)    | 1.36 (1.28-1.44)          | 1.15 (1.08-1.22)          | 1.00 (0.93-1.08)          | 1.02(0.96-1.10)           |
| Old adults                          | 23096/43097(53.6)  | 1.00                      | 1.00                      | 1.00                      | 1.00                      |

Abbreviations: CI, confidence interval; IV tPA, intravenous recombinant tissue plasminogen activator; OR, odds ratio.

Model 1: Logistic regression model without adjustment.

Model 2: Adjusted for gender, insurance, BMI, previous stroke/TIA, previous CAD/prior MI, diabetes, hypertension, have smoking experience or behavior, atrial fibrillation/flutter, glycated hemoglobin, diastolic blood pressure, systolic blood pressure, hypoglycemic drugs, antihypertensive drugs, antiplatelet drugs, and lipid-lowering drugs.

Model 3: Adjusted for in-hospital NIHSS score, gender, insurance, BMI, previous stroke/TIA, previous CAD/prior MI, diabetes, hypertension, have smoking experience or behavior, atrial fibrillation/flutter, glycated hemoglobin, diastolic blood pressure, blood pressure, hypoglycemic drugs, antihypertensive drugs, antiplatelet drugs, and lipid-lowering drugs. Patients (N= 2503) with missing values on NIHSS score were not included in this analysis.

model 4: results from multiple imputation.

## DISCUSSION

In this hospital-based observational study of 793 175 AIS patients, we found that young adults (<50 years of age) were more likely to be treated with IV tPA than older adults (7.2% vs 6.1%), which was consistent with our hypothesis. Our study demonstrated that young stroke patients had fewer comorbidities (previous stroke/TIA, previous CAD/prior MI, diabetes, hypertension, and atrial fibrillation/flutter) at baseline, which may compel providers to feel more secure in administering IV tPA to this group of patients. Even though we did not observe a difference in DNT between age groups, we found that young adults had more favorable in-hospital outcomes than older adults, including lower odds of sICH, in-hospital mortality and higher odds of independent ambulation at discharge. However, after adjusting for NIHSS scores, the differences were not significant. Therefore, the benefit among young adults may be explained by stroke severity measured by NIHSS score.

We chose 50 as the cut-off age because several important international studies on thrombolytic therapy in young people also set the cut-off age at 50.<sup>15,16</sup> Using the same cut-off age value would benefit the comparison with other studies and also have advantages for potential systematic review and meta-analysis.

IV tPA thrombolytic therapy is considered to be the standard therapy in patients with acute ischemic stroke. However, its use has been studied primarily in adults over age

1  
2  
3  
4 50.<sup>16</sup> Given increasing evidence in the literature that thrombolytic therapy rarely  
5  
6 causes hemorrhages in patients with stroke-mimicking conditions, providers may also  
7  
8 feel more comfortable administering IV tPA to young adults when it is uncertain  
9  
10 whether a stroke or a stroke mimic had occurred.<sup>25</sup> Our research also supports this  
11  
12 conclusion. Young adults had similar time to treatment and were more likely to be  
13  
14 treated than older adults, which may reflect increased awareness among patients and  
15  
16 clinicians that stroke is a potentially fatal disease affecting people of all ages.  
17  
18  
19  
20  
21  
22  
23  
24  
25

26 The relationship between time to treatment and mortality was first recognized in  
27  
28 clinical studies.<sup>26,27</sup> The importance of this metric was reemphasized in the 2004  
29  
30 American College of Cardiology/American Heart Association practice guidelines,  
31  
32 which stated that DNT targets “should not be perceived as an average performance  
33  
34 standard but as a goal that an early treatment system in every hospital should seek for  
35  
36 every appropriate patient”.<sup>28</sup> Consistent with a prior analysis of SITS-ISTR showing  
37  
38 no difference in median door-to-needle times between patients 18 to 50 and >50 years  
39  
40 of age, there was also not an obvious differentiation in treatment among young or  
41  
42 older adults in our study.<sup>15</sup> However, a prior study by Dodds and colleagues found  
43  
44 that young adults (18-40 years) with AIS were more likely to experience a delay in  
45  
46 evaluation and treatment.<sup>13</sup> Our definition of young adults (age <50 years) differs  
47  
48 from theirs (age 18–40 years) and is more applicable in China, which may also  
49  
50 explain why we did not find differences in treatment times between the two groups.<sup>29</sup>  
51  
52  
53  
54  
55  
56  
57  
58  
59  
60

1  
2  
3  
4 Another explanation for the lack of differences in treatment times between the two  
5  
6 groups may be that DNT mainly depends on hospital level and treatment process  
7  
8 rather than age.  
9  
10

11  
12  
13  
14  
15 In our study, we observed a higher rate of sICH and in-hospital mortality among older  
16  
17 adults treated with IV tPA, though the difference was not significant adjusted for  
18  
19 NIHSS scores. We cannot entirely separate young age from lower NIHSS score, as  
20  
21 young patients are highly correlated with lower NIHSS scores in clinical practise  
22  
23 (4.0±4.5 vs. 4.9±5.3, the Rank Biserial correlation coefficient in this study is 0.10,  
24  
25 p<0.001). Therefore, the associations may be partly explained by stroke severity  
26  
27 measured by NIHSS score. Although we do not find significant differences between  
28  
29 these two groups, we do see a trend towards better outcomes in young people. One  
30  
31 possible explanation is that younger stroke patients have fewer comorbidities in their  
32  
33 medical history, such as previous stroke or TIA, CAD/MI, diabetes mellitus,  
34  
35 hypertension, and atrial fibrillation, as well as milder strokes, all of which are  
36  
37 associated with better outcomes.<sup>30</sup> Other factors favoring recovery in young stroke  
38  
39 patients include greater brain plasticity and more robust family and social support.<sup>31</sup>  
40  
41  
42  
43  
44  
45  
46  
47  
48  
49  
50

51  
52  
53 There are several limitations in our study. Since hospital participation in the CSCA is  
54  
55 voluntary, participating hospitals are more likely to be larger, tertiary centers with a  
56  
57 myriad of resources that smaller hospitals do not have access to. We recognize that  
58  
59  
60

1  
2  
3  
4 findings from CSCA may not be generalizable to AIS patients admitted to hospitals  
5  
6 outside of the CSCA. Second, we did not report data on intra-arterial (IA) therapies  
7  
8 and puncture times because only a very small number of patients in our study received  
9  
10 thrombectomy. We also did not have door-to-imaging data to support the study and  
11  
12 there was a relatively high proportion of missing DNT values (6.3% overall, 6.8% in  
13  
14 young and 6.2% in older patients). However, we did not observe a significant  
15  
16 difference in DNTs between young and older AIS patients. Lastly, although we  
17  
18 provided some possible explanation for the differences between young and old adults  
19  
20 group, further researches are needed to explore the detailed mechanism.  
21  
22  
23  
24  
25  
26  
27  
28  
29  
30

## 31 **CONCLUSION**

32  
33  
34  
35 In summary, young adults with AIS are more likely to receive IV tPA than older  
36  
37 adults, but there is no difference between the two groups in time to treatment. Young  
38  
39 adults may have better in-hospital outcomes compared with older adults, suggesting  
40  
41 favorable effects of treatment with IV tPA.  
42  
43  
44  
45  
46  
47  
48

## 49 **ACKNOWLEDGEMENTS**

50  
51  
52 We thank the staff and participants of the CSCA (Chinese Stroke Center Alliance)  
53  
54 studies for their contribution.  
55  
56  
57  
58  
59  
60

## CONTRIBUTORS

Conceived and led the project: XZ, YW, ZL, YW and YJ. Conception and design:

HW, HG, YW and YJ. Data collection and analysis: HW, XY, CW, HG and QZ.

Interpret the data: LL, XM and HL. Drafting the article and revising the content: HW,

HG, CL, JY and ZL. All authors approved the final version of the manuscript.

## FUNDING

The Chinese Stroke Center Alliance program was supported by grants from the

Ministry of Science and Technology and the Ministry of Health of the People's

Republic of China (National Key R&D Program of China, Code: 2016YFC0901001,

2017YFC1310901, 2016YFC0901002, 2017YFC1307905, 2015BAI12B00), Beijing

Talents Project (2018A13, 2018000021223ZK03), CAMS Innovation Fund for

Medical Sciences (2019-I2M-5-029), Beijing Municipal Committee of Science and

Technology (Z201100005620010), Beijing Natural Science Foundation (Z200016).

## COMPETING INTERESTS

None declared.

## PATIENT CONSENT FOR PUBLICATION

Not required.

## ETHICS APPROVAL

This study received approval from the Institutional Review Board/Ethics Committee of Beijing Tiantan Hospital, Capital Medical University with approval number KY 2018-061-02. Participating hospitals received research approval to collect data in CSCA without requiring individual patient informed consent under the common rule or a waiver of authorisation and exemption from their Institutional Review Board.

## DATA AVAILABILITY STATEMENT

Data are available upon reasonable request. The data that support the findings of this study are available from the corresponding author upon reasonable request and after clearance by the local ethics committee.

## REFERENCES

1. Béjot Y, Bailly H, Durier J, et al. Epidemiology of stroke in Europe and trends for the 21st century. *Presse Med* 2016;45:e391-8. doi: 10.1016/j.lpm.2016.10.003 [published Online First: 2016/11/07]
2. Hathidara MY, Saini V, Malik AM. Stroke in the young: A global update. *Current neurology and neuroscience reports* 2019;19:91. doi: 10.1007/s11910-019-1004-1 [published Online First: 2019/11/27]
3. Rutten-Jacobs LC, Maaijwee NA, Arntz RM, et al. Risk factors and prognosis of

- 1  
2  
3  
4 young stroke. The FUTURE study: a prospective cohort study. Study rationale and  
5  
6 protocol. *BMC Neurol* 2011;11:109. doi: 10.1186/1471-2377-11-109 [published  
7  
8 Online First: 2011/09/22]  
9  
10  
11  
12 4. George MG. Risk Factors for Ischemic Stroke in Younger Adults: A Focused  
13  
14 Update. *Stroke* 2020;51:729-35. doi: 10.1161/strokeaha.119.024156 [published  
15  
16 Online First: 2020/02/23]  
17  
18  
19  
20 5. Maaijwee NA, Rutten-Jacobs LC, Schaapsmeeders P, et al. Ischaemic stroke in  
21  
22 young adults: risk factors and long-term consequences. *Nat Rev Neurol*  
23  
24 2014;10:315-25. doi: 10.1038/nrneurol.2014.72 [published Online First: 2014/04/30]  
25  
26  
27  
28 6. Feigin VL, Roth GA, Naghavi M, et al. Global burden of stroke and risk factors in  
29  
30 188 countries, during 1990–2013: a systematic analysis for the Global Burden of  
31  
32 Disease Study 2013. *The Lancet Neurology* 2016;15:913-24. doi:  
33  
34 10.1016/s1474-4422(16)30073-4  
35  
36  
37  
38  
39 7. Wang Y-J, Li Z-X, Gu H-Q, et al. China Stroke Statistics 2019: A Report From the  
40  
41 National Center for Healthcare Quality Management in Neurological Diseases, China  
42  
43 National Clinical Research Center for Neurological Diseases, the Chinese Stroke  
44  
45 Association, National Center for Chronic and Non-communicable Disease Control  
46  
47 and Prevention, Chinese Center for Disease Control and Prevention and Institute for  
48  
49 Global Neuroscience and Stroke Collaborations. *Stroke and Vascular Neurology*  
50  
51 2020;5:211-39. doi: 10.1136/svn-2020-000457  
52  
53  
54  
55  
56  
57  
58 8. Singhal AB, Biller J, Elkind MS, et al. Recognition and management of stroke in  
59  
60



- 1  
2  
3  
4 young adults and adolescents. *Neurology* 2013;81:1089-97. doi:  
5  
6 10.1212/WNL.0b013e3182a4a451 [published Online First: 2013/08/16]  
7  
8  
9 9. Peña-Martínez C, Durán-Laforet V, García-Culebras A, et al. Pharmacological  
10  
11 Modulation of Neutrophil Extracellular Traps Reverses Thrombotic Stroke tPA  
12  
13 (Tissue-Type Plasminogen Activator) Resistance. *Stroke* 2019;50:3228-37. doi:  
14  
15 10.1161/strokeaha.119.026848 [published Online First: 2019/09/19]  
16  
17  
18 10. Martínez-Sánchez P, Díez-Tejedor E, Fuentes B, et al. Systemic Reperfusion  
19  
20  
21  
22  
23  
24  
25  
26  
27  
28  
29  
30  
31  
32  
33  
34  
35  
36  
37  
38  
39  
40  
41  
42  
43  
44  
45  
46  
47  
48  
49  
50  
51  
52  
53  
54  
55  
56  
57  
58  
59  
60
11. Powers WJ, Rabinstein AA, Ackerson T, et al. Guidelines for the Early Management of Patients With Acute Ischemic Stroke: 2019 Update to the 2018 Guidelines for the Early Management of Acute Ischemic Stroke: A Guideline for Healthcare Professionals From the American Heart Association/American Stroke Association. *Stroke* 2019;50:e344-e418. doi:10.1161/STR.0000000000000211
12. Berge E, Whiteley W, Audebert H, et al. European Stroke Organisation (ESO) guidelines on intravenous thrombolysis for acute ischaemic stroke. *Eur Stroke J* 2021;6:I-LXII. doi: 10.1177/2396987321989865
13. Dodds JA, Xian Y, Sheng S, et al. Thrombolysis in young adults with stroke: Findings from Get With The Guidelines-Stroke. *Neurology* 2019;92:e2784-92. doi: 10.1212/wnl.0000000000007653 [published Online First: 2019/05/17]
14. Papavasileiou V, Goldstein LB. Thrombolysis in young adults with acute ischemic

1  
2  
3  
4 stroke. *Neurology* 2019;92:1129-30. doi: 10.1212/wnl.0000000000007651  
5

6  
7 15. Toni D, Ahmed N, Anzini A, et al. Intravenous thrombolysis in young stroke  
8  
9 patients: results from the SITS-ISTR. *Neurology* 2012;78:880-7. doi:  
10  
11 10.1212/WNL.0b013e31824d966b [published Online First: 2012/03/10]  
12  
13

14  
15 16. Poppe AY, Buchan AM, Hill MD. Intravenous thrombolysis for acute ischaemic  
16  
17 stroke in young adult patients. *Can J Neurol Sci* 2009;36:161-7. doi:  
18  
19 10.1017/s031716710012027x [published Online First: 2009/04/22]  
20  
21  
22

23  
24 17. Shi J, Cao Y, You S, et al. Young Stroke Patients Treated with Intravenous  
25  
26 Thrombolysis have a More Favorable Outcome and Mortality Compared with Older  
27  
28 Patients. *Curr Neurovasc Res* 2017;14:141-48. doi:  
29  
30 10.2174/1567202614666170328095431 [published Online First: 2017/03/31]  
31  
32  
33

34  
35 18. Wang Y, Li Z, Wang Y, et al. Chinese Stroke Center Alliance: a national effort to  
36  
37 improve healthcare quality for acute stroke and transient ischaemic attack: rationale,  
38  
39 design and preliminary findings. *Stroke Vasc Neurol* 2018;3:256-62. doi:  
40  
41 10.1136/svn-2018-000154 [published Online First: 2019/01/15]  
42  
43  
44

45  
46 19. Hsieh CY, Chen WF, Chen CH, et al. Efforts to reduce the door-to-needle time of  
47  
48 thrombolysis in acute ischemic stroke: video-assisted therapeutic risk communication.  
49  
50 *J Formos Med Assoc* 2014;113:929-33. doi: 10.1016/j.jfma.2013.11.012 [published  
51  
52 Online First: 2014/01/15]  
53  
54

55  
56 20. van Tuijn CF, Luitse JS, van der Valk M, et al. Reduction of the door-to-needle  
57  
58 time for administration of antibiotics in patients with a severe infection: a tailored  
59  
60

1  
2  
3  
4 intervention project. *Neth J Med* 2010;68:123-7.  
5

6  
7 21. Austin PC. Balance diagnostics for comparing the distribution of baseline  
8  
9 covariates between treatment groups in propensity-score matched samples. *Stat Med*  
10  
11 2009;28:3083-107. doi: 10.1002/sim.3697 [published Online First: 2009/09/17]  
12  
13

14  
15 22. Habib M, Karim ASMR, Hossain MM, et al. Assessment of Initial Stroke Severity  
16  
17 by National Institute Health Stroke Scale (NIHSS) Score at Admission. *Journal of*  
18  
19 *Dhaka Medical College* 2018;26:90-93. doi: 10.3329/jdmc.v26i2.38765  
20  
21

22  
23 23. Chen X, Zhan X, Chen M, et al. The prognostic value of combined NT-pro-BNP  
24  
25 levels and NIHSS scores in patients with acute ischemic stroke. *Intern Med*  
26  
27 2012;51:2887-92. doi: 10.2169/internalmedicine.51.8027 [published Online First:  
28  
29 2012/10/16]  
30  
31

32  
33 24. Gu HQ, Li DJ, Liu C, et al. %ggBaseline: a SAS macro for analyzing and  
34  
35 reporting baseline characteristics automatically in medical research. *Ann Transl Med*  
36  
37 2018;6:326. doi: 10.21037/atm.2018.08.13 [published Online First: 2018/10/27]  
38  
39

40  
41 25. Zinkstok SM, Engelter ST, Gensicke H, et al. Safety of thrombolysis in stroke  
42  
43 mimics: results from a multicenter cohort study. *Stroke* 2013;44:1080-4. doi:  
44  
45 10.1161/STROKEAHA.111.000126  
46  
47

48  
49 26. Cannon CP, Gibson CM, Lambrew CT, et al. Relationship of  
50  
51 symptom-onset-to-balloon time and door-to-balloon time with mortality in patients  
52  
53 undergoing angioplasty for acute myocardial infarction. *Jama* 2000;283:2941-7. doi:  
54  
55 10.1001/jama.283.22.2941 [published Online First: 2000/06/24]  
56  
57  
58  
59  
60

- 1  
2  
3  
4 27. Schull MJ, Vermeulen M, Donovan L, et al. Can the wrong statistic be bad for  
5  
6 health? Improving the reporting of door-to-needle time performance in acute  
7  
8 myocardial infarction. *Am Heart J* 2005;150:583-7. doi: 10.1016/j.ahj.2005.03.061  
9  
10 [published Online First: 2005/09/20]  
11  
12  
13  
14  
15 28. Antman EM, Anbe DT, Armstrong PW, et al. ACC/AHA guidelines for the  
16  
17 management of patients with ST-elevation myocardial infarction--executive summary:  
18  
19 a report of the American College of Cardiology/American Heart Association Task  
20  
21 Force on Practice Guidelines (Writing Committee to Revise the 1999 Guidelines for  
22  
23 the Management of Patients With Acute Myocardial Infarction). *Circulation*  
24  
25 2004;110:588-636. doi: 10.1161/01.Cir.0000134791.68010.Fa [published Online First:  
26  
27 2004/08/04]  
28  
29  
30  
31  
32  
33  
34 29. Xiaobing Z SH, Li'an H. Clinical investigation of stroke in young and  
35  
36 middle-aged adults. *Cerebrovascular Diseases Foreign Medical Sciences*  
37  
38 2004;012:354-7.  
39  
40  
41  
42 30. Arnold M, Halpern M, Meier N, et al. Age-dependent differences in demographics,  
43  
44 risk factors, co-morbidity, etiology, management, and clinical outcome of acute  
45  
46 ischemic stroke. *Journal of Neurology* 2008;255:1503-07. doi:  
47  
48 10.1007/s00415-008-0949-9  
49  
50  
51  
52  
53 31. Popa-Wagner A, Carmichael ST, Kokaia Z, et al. The response of the aged brain  
54  
55 to stroke: too much, too soon? *Curr Neurovasc Res* 2007;4:216-27. doi:  
56  
57 10.2174/156720207781387213 [published Online First: 2007/08/19]  
58  
59  
60

1  
2  
3  
4  
5 **Figure legend**  
6

7 Figure 1. Study flowchart for patients identification.

8 Abbreviations: IV tPA, intravenous tissue plasminogen activator.  
9  
10  
11  
12  
13  
14  
15  
16  
17  
18  
19  
20  
21  
22  
23  
24  
25  
26  
27  
28  
29  
30  
31  
32  
33  
34  
35  
36  
37  
38  
39  
40  
41  
42  
43  
44  
45  
46  
47  
48  
49  
50  
51  
52  
53  
54  
55  
56  
57  
58  
59  
60

For peer review only

**Source population**

Admission (N=838229)  
Hospital (N=1473)  
August 1, 2015 to July 31, 2019

Excluded (n=45054)

- In-hospital stroke (7941)
- Missing IV tPA information (17461)
- Missing arrival time (12)
- Transferred in from acute care hospital (1777)
- Contraindications to venous thrombolysis within a time window (17863)

**Analysis of outcomes in all ischemic stroke**

Admission (N=793175)  
Hospital (N=1471)

Excluding (n=745034)

- Treated with tPA but >4.5h (1315) Not
- treated with tPA (743719)

**Analysis of treatment times, and outcomes in patients treated with tPA within 4.5 hours**

Admission (N=48141)  
Hospital (N=1290)

## Supplemental Material

1  
2 Table I . Distribution of hospitals in our study

| Hospital region | Province or Municipality | Number of hospitals (N=676) | Hospital region | Province or Municipality | Number of hospitals (N=401) | Hospital region | Province or Municipality | Number of hospitals (N=394) |
|-----------------|--------------------------|-----------------------------|-----------------|--------------------------|-----------------------------|-----------------|--------------------------|-----------------------------|
| Eastern China   | Beijing                  | 16                          | Central China   | Jilin                    | 32                          | Western China   | Inner Mongolia           | 23                          |
|                 | Tianjin                  | 13                          |                 | Heilongjiang             | 41                          |                 | Guangxi                  | 49                          |
|                 | Hebei                    | 143                         |                 | Shanxi                   | 44                          |                 | Chongqing                | 16                          |
|                 | Liaoning                 | 53                          |                 | Anhui                    | 29                          |                 | Sichuan                  | 125                         |
|                 | Shanghai                 | 16                          |                 | Jiangxi                  | 25                          |                 | Guizhou                  | 23                          |
|                 | Jiangsu                  | 93                          |                 | Henan                    | 157                         |                 | Yunnan                   | 52                          |
|                 | Zhejiang                 | 86                          |                 | Hubei                    | 39                          |                 | Tibet                    | 1                           |
|                 | Fujian                   | 52                          |                 | Hunan                    | 34                          |                 | Shaanxi                  | 41                          |
|                 | Shandong                 | 81                          |                 |                          |                             |                 | Gansu                    | 33                          |
| Guangdong       | 113                      |                             |                 | Qinghai                  | 9                           |                 |                          |                             |
| Hainan          | 10                       |                             |                 | Ningxia                  | 5                           |                 |                          |                             |
|                 |                          |                             |                 | Xinjiang                 | 17                          |                 |                          |                             |

Table II. Baseline characteristics of young and old ischemic stroke patients with IV tPA treatment

| Baseline characteristics                      | Total<br>(N=48141 [100%]) | Young adults<br>(< 50 years)<br>(N=5044 [10.5%]) | Old adults (≥50 years)<br>(N=43097 [89.5%]) | ASD*  |
|-----------------------------------------------|---------------------------|--------------------------------------------------|---------------------------------------------|-------|
| <b>Patient characteristics</b>                |                           |                                                  |                                             |       |
| Age, years                                    | 65.2±12.1                 | 43.4±5.6                                         | 67.8±9.8                                    | 305.7 |
| Male, n (%)                                   | 31456 (65.3)              | 3961 (78.5)                                      | 27495 (63.8)                                | 32.9  |
| <b>Insurance status, n (%)</b>                |                           |                                                  |                                             |       |
| UEBMI                                         | 15948 (33.1)              | 1609 (31.9)                                      | 14339 (33.3)                                | 3.0   |
| URBMI                                         | 9813 (20.4)               | 913 (18.1)                                       | 8900 (20.7)                                 | 6.6   |
| NRCMS                                         | 16442 (34.2)              | 1495 (29.6)                                      | 14947 (34.7)                                | 10.9  |
| Self-pa                                       | 4083 (8.5)                | 813 (16.1)                                       | 3270 (7.6)                                  | 26.5  |
| Other                                         | 1855 (3.9)                | 214 (4.2)                                        | 1641 (3.8)                                  | 2.0   |
| <b>Arrive mode, n (%)</b>                     |                           |                                                  |                                             |       |
| Ambulance                                     | 14364 (29.8)              | 1352 (26.8)                                      | 13012 (30.2)                                | 7.5   |
| Private car                                   | 21213 (44.1)              | 2240 (44.4)                                      | 18973 (44.0)                                | 0.8   |
| Taxi                                          | 2539 (5.3)                | 357 (7.1)                                        | 2182 (5.1)                                  | 8.4   |
| Bicycle or tricycle                           | 118 (0.2)                 | 7 (0.1)                                          | 111 (0.3)                                   | 4.5   |
| Helicopter                                    | 14 (0.0)                  | 1 (0.0)                                          | 13 (0.0)                                    |       |
| Mobile stroke unit                            | 31 (0.1)                  | 4 (0.1)                                          | 27 (0.1)                                    | 0.0   |
| Other                                         | 9862 (20.5)               | 1083 (21.5)                                      | 8779 (20.4)                                 | 2.7   |
| <b>Medical history, n (%)</b>                 |                           |                                                  |                                             |       |
| Previous stroke/TIA                           | 12339 (25.6)              | 830 (16.5)                                       | 11509 (26.7)                                | 25.0  |
| CAD/prior MI                                  | 4737 (9.8)                | 240 (4.8)                                        | 4497 (10.4)                                 | 21.3  |
| Diabetes                                      | 8477 (17.6)               | 516 (10.2)                                       | 7961 (18.5)                                 | 23.8  |
| Peripheral vascular disease                   | 628 (1.3)                 | 31 (0.6)                                         | 597 (1.4)                                   | 8.0   |
| Hypertension                                  | 28815 (59.9)              | 2283 (45.3)                                      | 26532 (61.6)                                | 33.1  |
| Smoking <sup>†</sup>                          | 18835 (39.1)              | 2567 (50.9)                                      | 16268 (37.7)                                | 26.8  |
| Atrial fibrillation/flutter                   | 5692 (11.8)               | 138 (2.7)                                        | 5554 (12.9)                                 | 38.7  |
| Dyslipidemia                                  | 3195 (6.6)                | 351 (7.0)                                        | 2844 (6.6)                                  | 1.6   |
| Carotid stenosis                              | 454 (0.9)                 | 22 (0.4)                                         | 432 (1.0)                                   | 7.2   |
| <b>Medication history, n (%)</b>              |                           |                                                  |                                             |       |
| Anticoagulants                                | 1779 (3.7)                | 150 (3.0)                                        | 1629 (3.8)                                  | 4.4   |
| Hypoglycemic drugs                            | 6404 (13.3)               | 330 (6.5)                                        | 6074 (14.1)                                 | 25.2  |
| Antihypertensive drugs                        | 20099 (41.8)              | 1302 (25.8)                                      | 18797 (43.6)                                | 38.1  |
| Antiplatelet drugs                            | 7882 (16.4)               | 467 (9.3)                                        | 7415 (17.2)                                 | 23.5  |
| Lipid lowering drugs                          | 5614 (11.7)               | 382 (7.6)                                        | 5232 (12.1)                                 | 15.1  |
| NIHSS score in hospital <sup>‡</sup>          | 7.9±6.5                   | 6.4±5.3                                          | 8.0±6.6                                     | 26.7  |
| <b>Biochemical Indicators</b>                 |                           |                                                  |                                             |       |
| Glycated hemoglobin <sup>§</sup> , %          |                           | 5.6 (5.1–6.0)                                    | 5.8 (5.3–6.5)                               |       |
| BMI <sup>  </sup>                             | 23.6±4.2                  | 24.9±5.5                                         | 23.4±4.0                                    | 31.2  |
| Homocysteine <sup>#</sup> , μmol/L            | 13.3 (10.0–18.5)          | 12.7 (9.6–18.9)                                  | 13.3 (10.1–18.5)                            |       |
| Systolic blood pressure <sup>**</sup> , mmHg  | 152.5±23.8                | 148.3±24.6                                       | 153.0±23.7                                  | 19.5  |
| Diastolic blood pressure <sup>††</sup> , mmHg | 87.6±14.5                 | 92.1±16.1                                        | 87.1±14.2                                   | 32.9  |

(Continued)



Table 2. Baseline characteristics of young and old ischemic stroke patients with IV tPA treatment

| Baseline characteristics        | Total<br>(N=48141 [100%]) | Young adults<br>(< 50 years)<br>(N=5044 [10.5%]) | Old adults (≥50 years)<br>(N=43097 [89.5%]) | ASD* |
|---------------------------------|---------------------------|--------------------------------------------------|---------------------------------------------|------|
| Hospital characteristics, n (%) |                           |                                                  |                                             |      |
| Hospital level                  |                           |                                                  |                                             |      |
| Secondary hospital              | 16479 (34.2)              | 1735 (34.4)                                      | 14744 (34.2)                                | 0.4  |
| Tertiary hospital               | 31662 (65.8)              | 3309 (65.6)                                      | 28353 (65.8)                                | 0.4  |
| Hospital region                 |                           |                                                  |                                             |      |
| Eastern China                   | 26410 (54.9)              | 2792 (55.4)                                      | 23618 (54.8)                                | 1.2  |
| Central China                   | 15024 (31.2)              | 1630 (32.3)                                      | 13394 (31.1)                                | 2.6  |
| Western China                   | 6707 (13.9)               | 622 (12.3)                                       | 6085 (14.1)                                 | 5.3  |

Abbreviations: IV tPA, intravenous recombinant tissue plasminogen activator; UEBMI, urban employee basic medical insurance; URBMI, urban resident basic medical insurance; NRCMS, new rural cooperative medical scheme; TIA, transient ischemic attack; CAD, coronary artery disease; MI, myocardial infarction; SD, standard deviation; IQR, interquartile range; NIHSS, National Institutes of Health Stroke Scale; ASD, absolute standardized difference.

\*: An absolute standardized difference >10% indicates meaningful imbalance between 2 groups.

†: Smoking: having smoking experience or behaviors.

‡: Information was missing for N = 2503 patients (5.2%).

§: Information was missing for N = 4749 patients (9.9%), using the median for imputation.

||: Information was missing for N = 743 patients (1.5%), using the median for imputation.

#: Information was missing for N = 2682 patients (5.6%).

\*: Information was missing for N = 28 patients (0.1%), using the median for imputation.

††: Information was missing for N = 28 patients (0.1%), using the median for imputation.

Table III. In-hospital outcomes in young (&lt; 35 years ) and old (≥35 years) ischemic stroke patients treated with IV tPA

| Outcome                                | Total<br>(N=48141 [100%]) | young adults<br>(< 35 years )<br>(N=456 [0.9%]) | old adults (≥35 years)<br>(N=47685[99.1%])(REF) | Model | OR (95% CI)      | P value |
|----------------------------------------|---------------------------|-------------------------------------------------|-------------------------------------------------|-------|------------------|---------|
| sICH                                   | 414 (0.9)                 | 4 (0.9)                                         | 410 (0.9)                                       | 1     | 1.02 (0.38-2.74) | 0.9678  |
|                                        |                           |                                                 |                                                 | 2     | 1.45 (0.54-3.94) | 0.4612  |
|                                        |                           |                                                 |                                                 | 3     | 1.52 (0.56-4.13) | 0.4136  |
| In-hospital mortality                  | 579 (1.2)                 | 1 (0.2)                                         | 578 (1.2)                                       | 1     | 0.18 (0.03-1.28) | 0.0861  |
|                                        |                           |                                                 |                                                 | 2     | 0.28 (0.04-2.01) | 0.2066  |
|                                        |                           |                                                 |                                                 | 3     | 0.27 (0.04-1.97) | 0.1953  |
| Independent ambulation<br>at discharge | 26175 (54.4)              | 279 (61.2)                                      | 25896 (54.3)                                    | 1     | 1.33 (1.10-1.60) | 0.0034  |
|                                        |                           |                                                 |                                                 | 2     | 1.09 (0.90-1.32) | 0.384   |
|                                        |                           |                                                 |                                                 | 3     | 1.15 (0.92-1.42) | 0.2173  |

Abbreviations: CI, confidence interval; IV tPA, intravenous recombinant tissue plasminogen activator ; OR, odds ratio.

Model 1: Logistic regression model without adjustment.

Model 2: Adjusted for gender, insurance, BMI, previous stroke/TIA, previous CAD/prior MI, diabetes, hypertension, have smoking experience or behavior, atrial fibrillation/flutter, glyated hemoglobin, diastolic blood pressure, systolic blood pressure, hypoglycemic drugs, antihypertensive drugs, antiplatelet drugs, and lipid-lowering drugs.

Model 3: Adjusted for in-hospital NIHSS score, gender, insurance, BMI, previous stroke/TIA, previous CAD/prior MI, diabetes, hypertension, have smoking experience or behavior, atrial fibrillation/flutter, glyated hemoglobin, diastolic blood pressure, blood pressure, hypoglycemic drugs, antihypertensive drugs, antiplatelet drugs, and lipid-lowering drugs. Patients (N= 2503) with missing values on NIHSS score were not included in this analysis.

Table IV. In-hospital outcomes in young(< 45 years ) and old (≥45 years) ischemic stroke patients treated with IV tPA

| Outcome                                | Total<br>(N=48141 [100%]) | young adults<br>(< 45 years )<br>(N=2244 [4.7%]) | old adults (≥45 years)<br>(N=45897[95.3%])(REF) | Model | OR (95% CI)      | P value |
|----------------------------------------|---------------------------|--------------------------------------------------|-------------------------------------------------|-------|------------------|---------|
| sICH                                   | 414 (0.9)                 | 8 (0.4)                                          | 406 (0.9)                                       | 1     | 0.40 (0.20-0.81) | 0.0106  |
|                                        |                           |                                                  |                                                 | 2     | 0.54 (0.26-1.10) | 0.0877  |
|                                        |                           |                                                  |                                                 | 3     | 0.44 (0.19-0.99) | 0.048   |
| In-hospital mortality                  | 579 (1.2)                 | 8 (0.4)                                          | 571 (1.2)                                       | 1     | 0.28 (0.14-0.57) | 0.0004  |
|                                        |                           |                                                  |                                                 | 2     | 0.43 (0.21-0.87) | 0.0197  |
|                                        |                           |                                                  |                                                 | 3     | 0.52 (0.26-1.07) | 0.077   |
| Independent ambulation<br>at discharge | 26175 (54.4)              | 1356 (60.4)                                      | 24819 (54.1)                                    | 1     | 1.30 (1.19-1.41) | <0.0001 |
|                                        |                           |                                                  |                                                 | 2     | 1.08 (0.98-1.18) | 0.1082  |
|                                        |                           |                                                  |                                                 | 3     | 0.97 (0.88-1.08) | 0.6096  |

Abbreviations: CI, confidence interval; IV tPA, intravenous recombinant tissue plasminogen activator ; OR, odds ratio.

Model 1: Logistic regression model without adjustment.

Model 2: Adjusted for gender, insurance, BMI, previous stroke/TIA, previous CAD/prior MI, diabetes, hypertension, have smoking experience or behavior, atrial fibrillation/flutter, glyated hemoglobin, diastolic blood pressure, systolic blood pressure, hypoglycemic drugs, antihypertensive drugs, antiplatelet drugs,and lipid-lowering drugs.

Model 3: Adjusted for in-hospital NIHSS score, gender, insurance, BMI, previous stroke/TIA, previous CAD/prior MI, diabetes, hypertension, have smoking experience or behavior, atrial fibrillation/flutter, glyated hemoglobin, diastolic blood pressure, blood pressure, hypoglycemic drugs, antihypertensive drugs, antiplatelet drugs, and lipid-lowering drugs. Patients (N= 2503) with missing values on NIHSS score were not included in this analysis.

## STROBE Statement—checklist of items that should be included in reports of observational studies

| Section/item                 | Item No | Recommendation                                                                                                                                                                                                                                                                                                                                                                                                                                                         | Page No.  | Relevant text from manuscript |
|------------------------------|---------|------------------------------------------------------------------------------------------------------------------------------------------------------------------------------------------------------------------------------------------------------------------------------------------------------------------------------------------------------------------------------------------------------------------------------------------------------------------------|-----------|-------------------------------|
| Title and abstract           | 1       | (a) Indicate the study's design with a commonly used term in the title or the abstract                                                                                                                                                                                                                                                                                                                                                                                 | Page1,3,4 | Title,Abstract/Para1-2        |
|                              |         | (b) Provide in the abstract an informative and balanced summary of what was done and what was found                                                                                                                                                                                                                                                                                                                                                                    | Page3-4   | Abstract/Para2-4              |
| <b>Introduction</b>          |         |                                                                                                                                                                                                                                                                                                                                                                                                                                                                        |           |                               |
| Background/<br>rationale     | 2       | Explain the scientific background and rationale for the investigation being reported                                                                                                                                                                                                                                                                                                                                                                                   | Page7     | Introduction/Para1-2          |
| Objectives                   | 3       | State specific objectives, including any prespecified hypotheses                                                                                                                                                                                                                                                                                                                                                                                                       | Page7-8   | Introduction/Para3            |
| <b>Methods</b>               |         |                                                                                                                                                                                                                                                                                                                                                                                                                                                                        |           |                               |
| Study design                 | 4       | Present key elements of study design early in the paper                                                                                                                                                                                                                                                                                                                                                                                                                | Page8-9   | Methods/Para1                 |
| Setting                      | 5       | Describe the setting, locations, and relevant dates, including periods of recruitment, exposure, follow-up, and data collection                                                                                                                                                                                                                                                                                                                                        | Page9-10  | Methods/Para2-4               |
| Participants                 | 6       | (a) <b>Cohort study</b> —Give the eligibility criteria, and the sources and methods of selection of participants. Describe methods of follow-up<br><b>Case-control study</b> —Give the eligibility criteria, and the sources and methods of case ascertainment and control selection. Give the rationale for the choice of cases and controls<br><b>Cross-sectional study</b> —Give the eligibility criteria, and the sources and methods of selection of participants | Page8-10  | Methods/Para1-4               |
|                              |         | (b) <b>Cohort study</b> —For matched studies, give matching criteria and number of exposed and unexposed<br><b>Case-control study</b> —For matched studies, give matching criteria and the number of controls per case                                                                                                                                                                                                                                                 |           |                               |
| Variables                    | 7       | Clearly define all outcomes, exposures, predictors, potential confounders, and effect modifiers. Give diagnostic criteria, if applicable                                                                                                                                                                                                                                                                                                                               | Page9-10  | Methods/Para3-4               |
| Data sources/<br>measurement | 8*      | For each variable of interest, give sources of data and details of methods of assessment (measurement). Describe comparability of assessment methods if there is more than one group                                                                                                                                                                                                                                                                                   | Page8-11  | Methods/Para1-6               |
| Bias                         | 9       | Describe any efforts to address potential sources of bias                                                                                                                                                                                                                                                                                                                                                                                                              | Page10-12 | Methods/Para5-7               |
| Study size                   | 10      | Explain how the study size was arrived at                                                                                                                                                                                                                                                                                                                                                                                                                              | Page8-9   | Methods/Para1-2               |
| Quantitative<br>variables    | 11      | Explain how quantitative variables were handled in the analyses. If applicable, describe which groupings were chosen and why                                                                                                                                                                                                                                                                                                                                           | Page10-11 | Methods/Para5                 |

|                     |     |                                                                                                                                                                                                                                                                                                           |           |                    |
|---------------------|-----|-----------------------------------------------------------------------------------------------------------------------------------------------------------------------------------------------------------------------------------------------------------------------------------------------------------|-----------|--------------------|
| Statistical methods | 12  | (a) Describe all statistical methods, including those used to control for confounding                                                                                                                                                                                                                     | Page10-12 | Methods/Para5-8    |
|                     |     | (b) Describe any methods used to examine subgroups and interactions                                                                                                                                                                                                                                       | Page10-11 | Methods/Para5      |
|                     |     | (c) Explain how missing data were addressed                                                                                                                                                                                                                                                               | Page11-12 | Methods/Para7      |
|                     |     | (d) <b>Cohort study</b> —If applicable, explain how loss to follow-up was addressed<br><b>Case-control study</b> —If applicable, explain how matching of cases and controls was addressed<br><b>Cross-sectional study</b> —If applicable, describe analytical methods taking account of sampling strategy | Page11-12 | Methods/Para7      |
|                     |     | (e) Describe any sensitivity analyses                                                                                                                                                                                                                                                                     | Page11-12 | Methods/Para7      |
| <b>Results</b>      |     |                                                                                                                                                                                                                                                                                                           |           |                    |
| Participants        | 13* | (a) Report numbers of individuals at each stage of study—eg numbers potentially eligible, examined for eligibility, confirmed eligible, included in the study, completing follow-up, and analysed                                                                                                         | Page12    | Results/Para1      |
|                     |     | (b) Give reasons for non-participation at each stage                                                                                                                                                                                                                                                      |           | Figure1            |
|                     |     | (c) Consider use of a flow diagram                                                                                                                                                                                                                                                                        |           | Figure1            |
| Descriptive data    | 14* | (a) Give characteristics of study participants (eg demographic, clinical, social) and information on exposures and potential confounders                                                                                                                                                                  | Page12-15 | Results/Para1-2    |
|                     |     | (b) Indicate number of participants with missing data for each variable of interest                                                                                                                                                                                                                       | Page15    | Results/table1     |
|                     |     | (c) <b>Cohort study</b> —Summarise follow-up time (eg, average and total amount)                                                                                                                                                                                                                          |           |                    |
| Outcome data        | 15* | <b>Cohort study</b> —Report numbers of outcome events or summary measures over time                                                                                                                                                                                                                       | Page15-18 | Results/Para3-6    |
|                     |     | <b>Case-control study</b> —Report numbers in each exposure category, or summary measures of exposure                                                                                                                                                                                                      |           |                    |
|                     |     | <b>Cross-sectional study</b> —Report numbers of outcome events or summary measures                                                                                                                                                                                                                        |           |                    |
| Main results        | 16  | (a) Give unadjusted estimates and, if applicable, confounder-adjusted estimates and their precision (eg, 95% confidence interval). Make clear which confounders were adjusted for and why they were included                                                                                              | Page15-18 | Results/Para3-6    |
|                     |     | (b) Report category boundaries when continuous variables were categorized                                                                                                                                                                                                                                 | Page15-17 | Results/Para3-6    |
|                     |     | (c) If relevant, consider translating estimates of relative risk into absolute risk for a meaningful time period                                                                                                                                                                                          |           |                    |
| Other analyses      | 17  | Report other analyses done—eg analyses of subgroups and interactions, and sensitivity analyses                                                                                                                                                                                                            | Page15-18 | Results/Para3-6    |
| <b>Discussion</b>   |     |                                                                                                                                                                                                                                                                                                           |           |                    |
| Key results         | 18  | Summarise key results with reference to study objectives                                                                                                                                                                                                                                                  | Page19-21 | Discussion/Para1-5 |
| Limitations         | 19  | Discuss limitations of the study, taking into account sources of potential bias or imprecision. Discuss both direction and magnitude of any potential bias                                                                                                                                                | Page21-22 | Discussion/Para6   |

|                          |    |                                                                                                                                                                            |           |                    |
|--------------------------|----|----------------------------------------------------------------------------------------------------------------------------------------------------------------------------|-----------|--------------------|
| Interpretation           | 20 | Give a cautious overall interpretation of results considering objectives, limitations, multiplicity of analyses, results from similar studies, and other relevant evidence | Page19-22 | Discussion/Para2-6 |
| Generalisability         | 21 | Discuss the generalisability (external validity) of the study results                                                                                                      | Page21-22 | Discussion/Para6   |
| <b>Other information</b> |    |                                                                                                                                                                            |           |                    |
| Funding                  | 22 | Give the source of funding and the role of the funders for the present study and, if applicable, for the original study on which the present article is based              | Page23    | Funding            |

\*Give information separately for cases and controls in case-control studies and, if applicable, for exposed and unexposed groups in cohort and cross-sectional studies.

**Note:** An Explanation and Elaboration article discusses each checklist item and gives methodological background and published examples of transparent reporting. The STROBE checklist is best used in conjunction with this article (freely available on the Web sites of PLoS Medicine at <http://www.plosmedicine.org/>, Annals of Internal Medicine at <http://www.annals.org/>, and Epidemiology at <http://www.epidem.com/>). Information on the STROBE Initiative is available at [www.strobe-statement.org](http://www.strobe-statement.org).
