# Supplementary material for: Thrombolysis, time-to-treatment and in-hospital outcomes among young adults with ischaemic stroke in China: findings from a nationwide registry study in China
Source: PubMed Central journal article supplement — BMJ Open. 2022 Jun 23;12(6):e055055. doi: 10.1136/bmjopen-2021-055055 (PMC9234794; doi:10.1136/bmjopen-2021-055055), 2022-06-23
Supplement: bmjopen-2021-055055supp001.pdf [file bmjopen-2021-055055supp001.pdf]

## Supplemental Material

Table 1 . Distribution of hospitals in our study

| Hospital region | Province or Municipality | Number of hospitals (N=676) | Hospital region | Province or Municipality | Number of hospitals (N=401) | Hospital region | Province or Municipality | Number of hospitals (N=394) |
|-----------------|--------------------------|-----------------------------|-----------------|--------------------------|-----------------------------|-----------------|--------------------------|-----------------------------|
| Eastern China   | Beijing                  | 16                          | Central China   | Jilin                    | 32                          | Western China   | Inner Mongolia           | 23                          |
|                 | Tianjin                  | 13                          |                 | Heilongjiang             | 41                          |                 | Guangxi                  | 49                          |
|                 | Hebei                    | 143                         |                 | Shanxi                   | 44                          |                 | Chongqing                | 16                          |
|                 | Liaoning                 | 53                          |                 | Anhui                    | 29                          |                 | Sichuan                  | 125                         |
|                 | Shanghai                 | 16                          |                 | Jiangxi                  | 25                          |                 | Guizhou                  | 23                          |
|                 | Jiangsu                  | 93                          |                 | Henan                    | 157                         |                 | Yunnan                   | 52                          |
|                 | Zhejiang                 | 86                          |                 | Hubei                    | 39                          |                 | Tibet                    | 1                           |
|                 | Fujian                   | 52                          |                 | Hunan                    | 34                          |                 | Shaanxi                  | 41                          |
|                 | Shandong                 | 81                          |                 |                          |                             |                 | Gansu                    | 33                          |
|                 | Guangdong                | 113                         |                 |                          |                             |                 | Qinghai                  | 9                           |
| Hainan          | 10                       |                             |                 | Ningxia                  | 5                           |                 |                          |                             |
|                 |                          |                             |                 |                          |                             | Xinjiang        | 17                       |                             |

Table 1. Baseline characteristics of young and old ischemic stroke patients with IV tPA treatment

| Baseline characteristics         | Total<br>(N=48141 [100%]) | Young adults<br>(< 50 years)<br>(N=5044 [10.5%]) | Old adults (≥50 years)<br>(N=43097 [89.5%]) | ASD*  |
|----------------------------------|---------------------------|--------------------------------------------------|---------------------------------------------|-------|
| <b>Patient characteristics</b>   |                           |                                                  |                                             |       |
| Age, years                       | 65.2±12.1                 | 43.4±5.6                                         | 67.8±9.8                                    | 305.7 |
| Male, n (%)                      | 31456 (65.3)              | 3961 (78.5)                                      | 27495 (63.8)                                | 32.9  |
| <b>Insurance status, n (%)</b>   |                           |                                                  |                                             |       |
| UEBMI                            | 15948 (33.1)              | 1609 (31.9)                                      | 14339 (33.3)                                | 3.0   |
| URBMI                            | 9813 (20.4)               | 913 (18.1)                                       | 8900 (20.7)                                 | 6.6   |
| NRCMS                            | 16442 (34.2)              | 1495 (29.6)                                      | 14947 (34.7)                                | 10.9  |
| Self-pa                          | 4083 (8.5)                | 813 (16.1)                                       | 3270 (7.6)                                  | 26.5  |
| Other                            | 1855 (3.9)                | 214 (4.2)                                        | 1641 (3.8)                                  | 2.0   |
| <b>Arrive mode, n (%)</b>        |                           |                                                  |                                             |       |
| Ambulance                        | 14364 (29.8)              | 1352 (26.8)                                      | 13012 (30.2)                                | 7.5   |
| Private car                      | 21213 (44.1)              | 2240 (44.4)                                      | 18973 (44.0)                                | 0.8   |
| Taxi                             | 2539 (5.3)                | 357 (7.1)                                        | 2182 (5.1)                                  | 8.4   |
| Bicycle or tricycle              | 118 (0.2)                 | 7 (0.1)                                          | 111 (0.3)                                   | 4.5   |
| Helicopter                       | 14 (0.0)                  | 1 (0.0)                                          | 13 (0.0)                                    |       |
| Mobile stroke unit               | 31 (0.1)                  | 4 (0.1)                                          | 27 (0.1)                                    | 0.0   |
| Other                            | 9862 (20.5)               | 1083 (21.5)                                      | 8779 (20.4)                                 | 2.7   |
| <b>Medical history, n (%)</b>    |                           |                                                  |                                             |       |
| Previous stroke/TIA              | 12339 (25.6)              | 830 (16.5)                                       | 11509 (26.7)                                | 25.0  |
| CAD/prior MI                     | 4737 (9.8)                | 240 (4.8)                                        | 4497 (10.4)                                 | 21.3  |
| Diabetes                         | 8477 (17.6)               | 516 (10.2)                                       | 7961 (18.5)                                 | 23.8  |
| Peripheral vascular disease      | 628 (1.3)                 | 31 (0.6)                                         | 597 (1.4)                                   | 8.0   |
| Hypertension                     | 28815 (59.9)              | 2283 (45.3)                                      | 26532 (61.6)                                | 33.1  |
| Smoking†                         | 18835 (39.1)              | 2567 (50.9)                                      | 16268 (37.7)                                | 26.8  |
| Atrial fibrillation/flutter      | 5692 (11.8)               | 138 (2.7)                                        | 5554 (12.9)                                 | 38.7  |
| Dyslipidemia                     | 3195 (6.6)                | 351 (7.0)                                        | 2844 (6.6)                                  | 1.6   |
| Carotid stenosis                 | 454 (0.9)                 | 22 (0.4)                                         | 432 (1.0)                                   | 7.2   |
| <b>Medication history, n (%)</b> |                           |                                                  |                                             |       |
| Anticoagulants                   | 1779 (3.7)                | 150 (3.0)                                        | 1629 (3.8)                                  | 4.4   |
| Hypoglycemic drugs               | 6404 (13.3)               | 330 (6.5)                                        | 6074 (14.1)                                 | 25.2  |
| Antihypertensive drugs           | 20099 (41.8)              | 1302 (25.8)                                      | 18797 (43.6)                                | 38.1  |
| Antiplatelet drugs               | 7882 (16.4)               | 467 (9.3)                                        | 7415 (17.2)                                 | 23.5  |
| Lipid lowering drugs             | 5614 (11.7)               | 382 (7.6)                                        | 5232 (12.1)                                 | 15.1  |
| NIHSS score in hospital‡         | 7.9±6.5                   | 6.4±5.3                                          | 8.0±6.6                                     | 26.7  |
| <b>Biochemical Indicators</b>    |                           |                                                  |                                             |       |
| Glycated hemoglobin§,%           |                           | 5.6 (5.1–6.0)                                    | 5.8 (5.3–6.5)                               |       |
| BMI                              | 23.6±4.2                  | 24.9±5.5                                         | 23.4±4.0                                    | 31.2  |
| Homocysteine*, μmol/L            | 13.3 (10.0–18.5)          | 12.7 (9.6–18.9)                                  | 13.3 (10.1–18.5)                            |       |
| Systolic blood pressure**, mmHg  | 152.5±23.8                | 148.3±24.6                                       | 153.0±23.7                                  | 19.5  |
| Diastolic blood pressure††, mmHg | 87.6±14.5                 | 92.1±16.1                                        | 87.1±14.2                                   | 32.9  |

(Continued)

Table 1. Baseline characteristics of young and old ischemic stroke patients with IV tPA treatment

| Baseline characteristics        | Total<br>(N=48141 [100%]) | Young adults<br>( $< 50$ years)<br>(N=5044 [10.5%]) | Old adults ( $\geq 50$ years)<br>(N=43097 [89.5%]) | ASD* |
|---------------------------------|---------------------------|-----------------------------------------------------|----------------------------------------------------|------|
| Hospital characteristics, n (%) |                           |                                                     |                                                    |      |
| Hospital level                  |                           |                                                     |                                                    |      |
| Secondary hospital              | 16479 (34.2)              | 1735 (34.4)                                         | 14744 (34.2)                                       | 0.4  |
| Tertiary hospital               | 31662 (65.8)              | 3309 (65.6)                                         | 28353 (65.8)                                       | 0.4  |
| Hospital region                 |                           |                                                     |                                                    |      |
| Eastern China                   | 26410 (54.9)              | 2792 (55.4)                                         | 23618 (54.8)                                       | 1.2  |
| Central China                   | 15024 (31.2)              | 1630 (32.3)                                         | 13394 (31.1)                                       | 2.6  |
| Western China                   | 6707 (13.9)               | 622 (12.3)                                          | 6085 (14.1)                                        | 5.3  |

Abbreviations: IV tPA, intravenous recombinant tissue plasminogen activator; UEBMI, urban employee basic medical insurance; URBMI, urban resident basic medical insurance; NRCMS, new rural cooperative medical scheme; TIA, transient ischemic attack; CAD, coronary artery disease; MI, myocardial infarction; SD, standard deviation; IQR, interquartile range; NIHSS, National Institutes of Health Stroke Scale; ASD, absolute standardized difference.

\*: An absolute standardized difference%  $>10\%$  indicates meaningful imbalance between 2 groups.

†: Smoking: having smoking experience or behaviors.

‡: Information was missing for N = 2503 patients (5.2%).

§: Information was missing for N = 4749 patients (9.9%), using the median for imputation.

||: Information was missing for N = 743 patients (1.5%), using the median for imputation.

#: Information was missing for N = 2682 patients (5.6%).

\*\*: Information was missing for N = 28 patients (0.1%), using the median for imputation.

††: Information was missing for N = 28 patients (0.1%), using the median for imputation.

Table III. In-hospital outcomes in young (< 35 years ) and old ( $\geq 35$  years) ischemic stroke patients treated with IV tPA

| Outcome                                | Total<br>(N=48141 [100%]) | young adults<br>(< 35 years )<br>(N=456 [0.9%]) | old adults ( $\geq 35$ years)<br>(N=47685[99.1%])(REF) | Model | OR (95% CI)      | P value |
|----------------------------------------|---------------------------|-------------------------------------------------|--------------------------------------------------------|-------|------------------|---------|
| sICH                                   | 414 (0.9)                 | 4 (0.9)                                         | 410 (0.9)                                              | 1     | 1.02 (0.38-2.74) | 0.9678  |
|                                        |                           |                                                 |                                                        | 2     | 1.45 (0.54-3.94) | 0.4612  |
|                                        |                           |                                                 |                                                        | 3     | 1.52 (0.56-4.13) | 0.4136  |
| In-hospital mortality                  | 579 (1.2)                 | 1 (0.2)                                         | 578 (1.2)                                              | 1     | 0.18 (0.03-1.28) | 0.0861  |
|                                        |                           |                                                 |                                                        | 2     | 0.28 (0.04-2.01) | 0.2066  |
|                                        |                           |                                                 |                                                        | 3     | 0.27 (0.04-1.97) | 0.1953  |
| Independent ambulation<br>at discharge | 26175 (54.4)              | 279 (61.2)                                      | 25896 (54.3)                                           | 1     | 1.33 (1.10-1.60) | 0.0034  |
|                                        |                           |                                                 |                                                        | 2     | 1.09 (0.90-1.32) | 0.384   |
|                                        |                           |                                                 |                                                        | 3     | 1.15 (0.92-1.42) | 0.2173  |

Abbreviations: CI, confidence interval; IV tPA, intravenous recombinant tissue plasminogen activator ; OR, odds ratio.

Model 1: Logistic regression model without adjustment.

Model 2: Adjusted for gender, insurance, BMI, previous stroke/TIA, previous CAD/prior MI, diabetes, hypertension, have smoking experience or behavior, atrial fibrillation/flutter, glycated hemoglobin, diastolic blood pressure, systolic blood pressure, hypoglycemic drugs, antihypertensive drugs, antiplatelet drugs, and lipid-lowering drugs.

Model 3: Adjusted for in-hospital NIHSS score, gender, insurance, BMI, previous stroke/TIA, previous CAD/prior MI, diabetes, hypertension, have smoking experience or behavior, atrial fibrillation/flutter, glycated hemoglobin, diastolic blood pressure, blood pressure, hypoglycemic drugs, antihypertensive drugs, antiplatelet drugs, and lipid-lowering drugs. Patients (N= 2503) with missing values on NIHSS score were not included in this analysis.

Table IV. In-hospital outcomes in young (&lt; 45 years ) and old (≥45 years) ischemic stroke patients treated with IV tPA

| Outcome                                | Total<br>(N=48141 [100%]) | young adults<br>(< 45 years )<br>(N=2244 [4.7%]) | old adults (≥45 years)<br>(N=45897[95.3%])(REF) | Model | OR (95% CI)      | P value |
|----------------------------------------|---------------------------|--------------------------------------------------|-------------------------------------------------|-------|------------------|---------|
| sICH                                   | 414 (0.9)                 | 8 (0.4)                                          | 406 (0.9)                                       | 1     | 0.40 (0.20-0.81) | 0.0106  |
|                                        |                           |                                                  |                                                 | 2     | 0.54 (0.26-1.10) | 0.0877  |
|                                        |                           |                                                  |                                                 | 3     | 0.44 (0.19-0.99) | 0.048   |
| In-hospital mortality                  | 579 (1.2)                 | 8 (0.4)                                          | 571 (1.2)                                       | 1     | 0.28 (0.14-0.57) | 0.0004  |
|                                        |                           |                                                  |                                                 | 2     | 0.43 (0.21-0.87) | 0.0197  |
|                                        |                           |                                                  |                                                 | 3     | 0.52 (0.26-1.07) | 0.077   |
| Independent ambulation<br>at discharge | 26175 (54.4)              | 1356 (60.4)                                      | 24819 (54.1)                                    | 1     | 1.30 (1.19-1.41) | <0.0001 |
|                                        |                           |                                                  |                                                 | 2     | 1.08 (0.98-1.18) | 0.1082  |
|                                        |                           |                                                  |                                                 | 3     | 0.97 (0.88-1.08) | 0.6096  |

Abbreviations: CI, confidence interval; IV tPA, intravenous recombinant tissue plasminogen activator ; OR, odds ratio.

Model 1: Logistic regression model without adjustment.

Model 2: Adjusted for gender, insurance, BMI, previous stroke/TIA, previous CAD/prior MI, diabetes, hypertension, have smoking experience or behavior, atrial fibrillation/flutter, glycated hemoglobin, diastolic blood pressure, systolic blood pressure, hypoglycemic drugs, antihypertensive drugs, antiplatelet drugs, and lipid-lowering drugs.

Model 3: Adjusted for in-hospital NIHSS score, gender, insurance, BMI, previous stroke/TIA, previous CAD/prior MI, diabetes, hypertension, have smoking experience or behavior, atrial fibrillation/flutter, glycated hemoglobin, diastolic blood pressure, blood pressure, hypoglycemic drugs, antihypertensive drugs, antiplatelet drugs, and lipid-lowering drugs. Patients (N= 2503) with missing values on NIHSS score were not included in this analysis.
